# Supplementary material for: Pharmaceutical Residual Solvent Analysis: A Comparison of GC-FID and SIFT-MS Performance
Source: MDPI journal article supplement (doi:10.3390/appliedchem3020018), 2023-06-01

## SUPPLEMENTARY MATERIALS

# Pharmaceutical Residual Solvent Analysis: A Comparison of GC-FID and SIFT-MS Performance

Mark J. Perkins <sup>1</sup>, Colin Hastie <sup>1</sup>, Sophia E. Whitlock <sup>2</sup>, and Vaughan S. Langford <sup>2,\*</sup>

<sup>1</sup> Element Materials Technology, Giron, Cambridge CB3 0NA, UK

<sup>2</sup> Syft Technologies Limited, Christchurch 8011, New Zealand

\* Correspondence: vaughan.langford@syft.com; Tel.: +64-3-3386701

## Contents

### Tables

#### A. Materials and Methods

Table S1. Target solvents and the SIFT-MS reagent ion – primary product ion pairs used to quantify them. 3

Table S2. Comparison of method validation parameters, sample preparation, and sample scheduling for Runs 1 and 2. 4

#### B. Linearity

Table S3. SIFT-MS linearity data for Class 2A solvents. 5

Table S4. SIFT-MS linearity data for Class 2B solvents. 6

Table S5. GC-FID linearity data for Class 2A solvents. 7

Table S6. GC-FID linearity data for Class 2B solvents. 8

#### C. Repeatability

Table S7a. SIFT-MS repeatability data for Class 2A solvents (Run 1). 9

Table S7b. SIFT-MS repeatability data for Class 2A solvents (Run 2). 10

Table S8a. SIFT-MS repeatability data for Class 2B solvents (Run 1). 11

Table S8b. SIFT-MS repeatability data for Class 2B solvents (Run 2). 12

Table S9a. GC-FID repeatability data for Class 2A solvents (Run 1). 13

Table S9b. GC-FID repeatability data for Class 2A solvents (Run 2). 14

Table S10a. GC-FID repeatability data for Class 2B solvents (Run 1). 15

Table S10b. GC-FID repeatability data for Class 2B solvents (Run 2). 16

#### D. Accuracy

##### *C.1. Tablet*

Table S11a. SIFT-MS accuracy data for Class 2A solvents (Run 1). 17

Table S11b. SIFT-MS accuracy data for Class 2A solvents (Run 2). 18

Table S12a. SIFT-MS accuracy data for Class 2B solvents (Run 1). 19

Table S12b. SIFT-MS accuracy data for Class 2B solvents (Run 2). 20

Table S13a. GC-FID accuracy data for Class 2A solvents (Run 1). 21

Table S13b. GC-FID accuracy data for Class 2A solvents (Run 2). 22

Table S14a. GC-FID accuracy data for Class 2B solvents (Run 1). 23

Table S14b. GC-FID accuracy data for Class 2B solvents (Run 2). 24

##### *C.2. Oral suspension*

Table S15a. SIFT-MS accuracy data for Class 2A solvents (Run 1). 25

Table S15b. SIFT-MS accuracy data for Class 2A solvents (Run 2). 26

Table S16a. SIFT-MS accuracy data for Class 2B solvents (Run 1). 27

## Contents (continued)

|                                                                                               |    |
|-----------------------------------------------------------------------------------------------|----|
| Table S16b. SIFT-MS accuracy data for Class 2B solvents (Run 2).                              | 28 |
| Table S17a. GC-FID accuracy data for Class 2A solvents (Run 1).                               | 29 |
| Table S17b. GC-FID accuracy data for Class 2A solvents (Run 2).                               | 30 |
| Table S18a. GC-FID accuracy data for Class 2B solvents (Run 1).                               | 31 |
| Table S18b. GC-FID accuracy data for Class 2B solvents (Run 2).                               | 32 |
| E. Recovery                                                                                   |    |
| <i>D.1. Tablet</i>                                                                            |    |
| Table S19a. SIFT-MS recovery data for Class 2A solvents (Run 1).                              | 33 |
| Table S19b. SIFT-MS recovery data for Class 2A solvents (Run 2).                              | 34 |
| Table S20a. SIFT-MS recovery data for Class 2B solvents (Run 1).                              | 35 |
| Table S20b. SIFT-MS recovery data for Class 2B solvents (Run 2).                              | 36 |
| Table S21a. GC-FID recovery data for Class 2A solvents (Run 1).                               | 37 |
| Table S21b. GC-FID recovery data for Class 2A solvents (Run 2).                               | 38 |
| Table S22a. GC-FID recovery data for Class 2B solvents (Run 1).                               | 39 |
| Table S22b. GC-FID recovery data for Class 2B solvents (Run 2).                               | 40 |
| <i>D.2. Oral suspension</i>                                                                   |    |
| Table S23a. SIFT-MS recovery data for Class 2A solvents (Run 1).                              | 41 |
| Table S23b. SIFT-MS recovery data for Class 2A solvents (Run 2).                              | 42 |
| Table S24a. SIFT-MS recovery data for Class 2B solvents (Run 1).                              | 43 |
| Table S24b. SIFT-MS recovery data for Class 2B solvents (Run 2).                              | 44 |
| Table S25a. GC-FID recovery data for Class 2A solvents (Run 1).                               | 45 |
| Table S25b. GC-FID recovery data for Class 2A solvents (Run 2).                               | 46 |
| Table S26a. GC-FID recovery data for Class 2B solvents (Run 1).                               | 47 |
| Table S26b. GC-FID recovery data for Class 2B solvents (Run 2).                               | 48 |
| Figures                                                                                       |    |
| A. Linearity                                                                                  |    |
| Figure S1. SIFT-MS linearity plots for Class 2A solvents.                                     | 49 |
| Figure S2. SIFT-MS linearity plots for Class 2B solvents.                                     | 51 |
| Figure S3. GC-FID linearity plots for Class 2A solvents.                                      | 52 |
| Figure S4. GC-FID linearity plots for Class 2B solvents.                                      | 54 |
| B. Accuracy                                                                                   |    |
| Figure S5. GC-FID and SIFT-MS accuracy data for Run 1 ( <i>cf.</i> Figure 6 in main article). | 56 |
| C. Recovery                                                                                   |    |
| Figure S6. GC-FID and SIFT-MS recovery data for Run 1 ( <i>cf.</i> Figure 7 in main article). | 57 |

## Tables

### A. Materials and Methods

**Table S1.** Target solvents and the SIFT-MS reagent ion - primary product ion pairs used to quantify them (to avoid unnecessary complications, only the product ions used in the method are shown). Product ion formulae, mass-to charge ratios, and ion signal ratios are also shown.

| Compound, Molecular Formula                                        | Reagent Ion                   | Product Ion Formula                                                            | Product Ion m/z | Ion Signal Ratios | Reference* |
|--------------------------------------------------------------------|-------------------------------|--------------------------------------------------------------------------------|-----------------|-------------------|------------|
| Acetonitrile, C <sub>2</sub> H <sub>3</sub> N                      | H <sub>3</sub> O <sup>+</sup> | C <sub>2</sub> H <sub>3</sub> N.H <sup>+</sup>                                 | 78              | 100%              | [18]       |
| Chlorobenzene, C <sub>6</sub> H <sub>5</sub> Cl                    | O <sub>2</sub> <sup>++</sup>  | C <sub>6</sub> H <sub>5</sub> <sup>35</sup> Cl <sup>++</sup>                   | 112             | 75%               | [19]       |
|                                                                    | O <sub>2</sub> <sup>++</sup>  | C <sub>6</sub> H <sub>5</sub> <sup>37</sup> Cl <sup>++</sup>                   | 114             | 25%               |            |
| Chloroform, CHCl <sub>3</sub>                                      | O <sub>2</sub> <sup>++</sup>  | CH <sup>35</sup> Cl <sub>2</sub> <sup>+</sup>                                  | 83              | 56%               | [20]       |
|                                                                    | O <sub>2</sub> <sup>++</sup>  | CH <sup>35</sup> Cl <sup>37</sup> Cl <sup>+</sup>                              | 85              | 38%               |            |
| Cumene, C <sub>9</sub> H <sub>12</sub>                             | NO <sup>+</sup>               | C <sub>9</sub> H <sub>12</sub> <sup>++</sup>                                   | 120             | 60%               | [21]       |
| Cyclohexane, C <sub>6</sub> H <sub>12</sub>                        | NO <sup>+</sup>               | C <sub>6</sub> H <sub>11</sub> <sup>+</sup>                                    | 83              | 64%               | [22]       |
|                                                                    | O <sub>2</sub> <sup>++</sup>  | C <sub>6</sub> H <sub>12</sub> <sup>++</sup>                                   | 84              | 74%               |            |
| 1,2-Dichloroethene, C <sub>2</sub> H <sub>2</sub> Cl <sub>2</sub>  | H <sub>3</sub> O <sup>+</sup> | C <sub>2</sub> H <sub>2</sub> <sup>35</sup> Cl <sup>37</sup> Cl.H <sup>+</sup> | 99              | 20%               | [21]       |
|                                                                    | O <sub>2</sub> <sup>++</sup>  | C <sub>2</sub> H <sub>2</sub> <sup>35</sup> Cl <sub>2</sub> <sup>++</sup>      | 96              | 60%               |            |
|                                                                    | O <sub>2</sub> <sup>++</sup>  | C <sub>2</sub> H <sub>2</sub> <sup>35</sup> Cl <sup>37</sup> Cl <sup>++</sup>  | 98              | 35%               |            |
| 1,2-Dimethoxyethane, C <sub>4</sub> H <sub>10</sub> O <sub>2</sub> | H <sub>3</sub> O <sup>+</sup> | C <sub>4</sub> H <sub>10</sub> O <sub>2</sub> .H <sup>+</sup>                  | 91              | 40%               | [23]       |
|                                                                    | NO <sup>+</sup>               | C <sub>4</sub> H <sub>9</sub> O <sub>2</sub> <sup>+</sup>                      | 89              | 80%               |            |
| 1,4-Dioxane, C <sub>4</sub> H <sub>8</sub> O <sub>2</sub>          | H <sub>3</sub> O <sup>+</sup> | C <sub>4</sub> H <sub>8</sub> O <sub>2</sub> .H <sup>+</sup>                   | 89              | 100%              | [24]       |
|                                                                    | NO <sup>+</sup>               | C <sub>4</sub> H <sub>7</sub> O <sub>2</sub> <sup>+</sup>                      | 87              | 55%               |            |
|                                                                    | NO <sup>+</sup>               | C <sub>4</sub> H <sub>8</sub> O <sub>2</sub> <sup>++</sup>                     | 88              | 45%               |            |
| Hexane, C <sub>6</sub> H <sub>14</sub>                             | NO <sup>+</sup>               | C <sub>6</sub> H <sub>13</sub> <sup>+</sup>                                    | 85              | 100%              | [25]       |
| Methanol, CH <sub>4</sub> O                                        | H <sub>3</sub> O <sup>+</sup> | CH <sub>4</sub> O.H <sup>+</sup>                                               | 33              | 100%              | [26]       |
| Methylbutylketone, C <sub>6</sub> H <sub>12</sub> O                | NO <sup>+</sup>               | C <sub>6</sub> H <sub>12</sub> O.NO <sup>+</sup>                               | 130             | 100%              | [27]       |
| Methylcyclohexane, C <sub>7</sub> H <sub>14</sub>                  | NO <sup>+</sup>               | C <sub>7</sub> H <sub>13</sub> <sup>+</sup>                                    | 97              | 100%              | [28]       |
| Methylene chloride, CH <sub>2</sub> Cl <sub>2</sub>                | O <sub>2</sub> <sup>++</sup>  | CH <sub>2</sub> <sup>35</sup> Cl <sub>2</sub> <sup>++</sup>                    | 84              | 56%               | [20]       |
|                                                                    | O <sub>2</sub> <sup>++</sup>  | CH <sub>2</sub> <sup>35</sup> Cl <sup>37</sup> Cl <sup>++</sup>                | 86              | 38%               |            |
| Nitromethane, CH <sub>3</sub> NO <sub>2</sub>                      | H <sub>3</sub> O <sup>+</sup> | CH <sub>3</sub> NO <sub>2</sub> .H <sup>+</sup>                                | 62              | 100%              | [29]       |
| Pyridine, C <sub>5</sub> H <sub>5</sub> N                          | H <sub>3</sub> O <sup>+</sup> | C <sub>5</sub> H <sub>5</sub> N.H <sup>+</sup>                                 | 80              | 100%              | [18]       |
| Tetrahydrofuran, C <sub>4</sub> H <sub>8</sub> O                   | NO <sup>+</sup>               | C <sub>4</sub> H <sub>7</sub> O <sup>+</sup>                                   | 71              | 100%              | [23]       |
| Tetralin, C <sub>8</sub> H <sub>10</sub>                           | NO <sup>+</sup>               | C <sub>10</sub> H <sub>12</sub> <sup>++</sup>                                  | 132             | 100%              | [30]       |
|                                                                    | O <sub>2</sub> <sup>++</sup>  | C <sub>8</sub> H <sub>8</sub> <sup>++</sup>                                    | 104             | 35%               |            |
| Toluene, C <sub>7</sub> H <sub>8</sub>                             | NO <sup>+</sup>               | C <sub>7</sub> H <sub>8</sub> <sup>++</sup>                                    | 92              | 100%              | [31]       |
|                                                                    | O <sub>2</sub> <sup>++</sup>  | C <sub>7</sub> H <sub>8</sub> <sup>++</sup>                                    | 92              | 100%              |            |

| Compound, Molecular Formula                                        | Reagent Ion                  | Product Ion Formula                                                           | Product Ion m/z | Ion Signal Ratios | Reference* |
|--------------------------------------------------------------------|------------------------------|-------------------------------------------------------------------------------|-----------------|-------------------|------------|
| Trichloroethylene, C <sub>2</sub> HCl <sub>3</sub>                 | O <sub>2</sub> <sup>++</sup> | C <sub>2</sub> H <sup>35</sup> Cl <sub>3</sub> <sup>++</sup>                  | 130             | 42%               | [20]       |
|                                                                    | O <sub>2</sub> <sup>++</sup> | C <sub>2</sub> H <sup>35</sup> Cl <sub>2</sub> <sup>37</sup> Cl <sup>++</sup> | 132             | 42%               |            |
| Xylene (all isomers; ethylbenzene), C <sub>8</sub> H <sub>10</sub> | NO <sup>+</sup>              | C <sub>8</sub> H <sub>10</sub> <sup>++</sup>                                  | 106             | 100%              | [31]       |

\* These reference numbers correspond to citations in the article itself.

**Table S2.** Comparison of method validation parameters, sample preparation and sample scheduling for Runs 1 and 2 in the present study.

| Parameter / Activity     |                                                                                                                                                                                                                                                                                                  | Run 1                                                                                                                                                                                                                                                                                                                                                                        | Run 2                                                       |
|--------------------------|--------------------------------------------------------------------------------------------------------------------------------------------------------------------------------------------------------------------------------------------------------------------------------------------------|------------------------------------------------------------------------------------------------------------------------------------------------------------------------------------------------------------------------------------------------------------------------------------------------------------------------------------------------------------------------------|-------------------------------------------------------------|
| Linearity                |                                                                                                                                                                                                                                                                                                  | Yes                                                                                                                                                                                                                                                                                                                                                                          | No                                                          |
| Precision: Repeatability |                                                                                                                                                                                                                                                                                                  | Yes (six replicates)                                                                                                                                                                                                                                                                                                                                                         | Yes (non-standard: triplicate measurement at start and end) |
| Accuracy                 |                                                                                                                                                                                                                                                                                                  | Yes                                                                                                                                                                                                                                                                                                                                                                          | Yes                                                         |
| Recovery                 |                                                                                                                                                                                                                                                                                                  | Yes                                                                                                                                                                                                                                                                                                                                                                          | Yes                                                         |
| Sample preparation order | Batch-wise preparation (standard stock solution re-capped after addition to vials in each step 2 to 4):                                                                                                                                                                                          | Batch-wise preparation (standard stock solution re-capped after addition to vials in each step 2 to 5):                                                                                                                                                                                                                                                                      |                                                             |
|                          | 1. Addition of all test solutions (sample solutions) and water to appropriate vials<br>2. Calibrations (6x pre-calibration)<br>3. Tablet – 50 and 100% spikes<br>4. Oral suspension – 50 and 100% spikes                                                                                         | 1. Addition of all test solutions (sample solutions) and water to appropriate vials<br>2. Calibrations (triplicate pre-calibration)<br>3. Tablet and oral suspension – 100% spikes<br>4. Tablet and oral suspension – 50% spike<br>5. Calibrations (triplicate post-calibration).                                                                                            |                                                             |
| Sample run order         | 1. Blank<br>2. Calibrations x6<br>3. Tablet (triplicate)<br>4. Tablet plus 50% spike (triplicate)<br>5. Tablet plus 100% spike (triplicate)<br>6. Oral suspension (triplicate)<br>7. Oral suspension plus 50% spike (triplicate)<br>8. Oral suspension plus 100% spike (triplicate)<br>9. Blank. | 1. Blank<br>2. Calibrations (triplicate pre-calibration)<br>3. Tablet (triplicate)<br>4. Tablet plus 50% spike (triplicate)<br>5. Tablet plus 100% spike (triplicate)<br>6. Oral suspension (triplicate)<br>7. Oral suspension plus 50% spike (triplicate)<br>8. Oral suspension plus 100% spike (triplicate)<br>9. Calibrations (triplicate post-calibration)<br>10. Blank. |                                                             |

## B. Linearity

**Table S3.** SIFT-MS linearity data for Class 2A solvents across the concentration levels 0.2 to 1.0. SIFT-MS response is the headspace concentration in ppmV.

| Concentration Level   | Acetonitrile<br>(H <sub>3</sub> O <sup>+</sup> 42) | Chlorobenzene<br>(O <sub>2</sub> <sup>+</sup> 112) | Chlorobenzene<br>(O <sub>2</sub> <sup>+</sup> 114) | Cumene<br>(NO <sup>+</sup> 120) | Cyclohexane<br>(NO <sup>+</sup> 83) | Cyclohexane<br>(O <sub>2</sub> <sup>+</sup> 84) | 1,2-Dichloroethene<br>(H <sub>3</sub> O <sup>+</sup> 99) | 1,2-Dichloroethene<br>(O <sub>2</sub> <sup>+</sup> 96) | 1,2-Dichloroethene<br>(O <sub>2</sub> <sup>+</sup> 98) | 1,4-Dioxane<br>(H <sub>3</sub> O <sup>+</sup> 89) | 1,4-Dioxane<br>(NO <sup>+</sup> 87) | 1,4-Dioxane<br>(NO <sup>+</sup> 88) | Methanol<br>(H <sub>3</sub> O <sup>+</sup> 33) | Methylcyclohexane<br>(NO <sup>+</sup> 97) | Methylene chloride<br>(O <sub>2</sub> <sup>+</sup> 84) | Methylene chloride<br>(O <sub>2</sub> <sup>+</sup> 86) | Tetrahydrofuran<br>(NO <sup>+</sup> 71) | Toluene<br>(NO <sup>+</sup> 92) | Toluene<br>(O <sub>2</sub> <sup>+</sup> 92) | Xylene<br>(NO <sup>+</sup> 106) |
|-----------------------|----------------------------------------------------|----------------------------------------------------|----------------------------------------------------|---------------------------------|-------------------------------------|-------------------------------------------------|----------------------------------------------------------|--------------------------------------------------------|--------------------------------------------------------|---------------------------------------------------|-------------------------------------|-------------------------------------|------------------------------------------------|-------------------------------------------|--------------------------------------------------------|--------------------------------------------------------|-----------------------------------------|---------------------------------|---------------------------------------------|---------------------------------|
| 0.2                   | 0.050                                              | 0.585                                              | 0.567                                              | 0.335                           | 7.36                                | 7.40                                            | 2.23                                                     | 4.99                                                   | 7.28                                                   | 0.010                                             | 0.010                               | 0.009                               | 0.138                                          | 1.85                                      | 8.05                                                   | 1.05                                                   | 0.218                                   | 2.979                           | 2.780                                       | 5.00                            |
| 0.4                   | 0.091                                              | 1.15                                               | 1.09                                               | 0.576                           | 13.2                                | 12.6                                            | 3.63                                                     | 9.60                                                   | 13.5                                                   | 0.019                                             | 0.019                               | 0.018                               | 0.251                                          | 3.41                                      | 13.6                                                   | 1.88                                                   | 0.444                                   | 5.69                            | 5.38                                        | 9.48                            |
| 0.6                   | 0.140                                              | 1.95                                               | 1.82                                               | 0.982                           | 22.6                                | 20.7                                            | 6.12                                                     | 16.2                                                   | 23.4                                                   | 0.031                                             | 0.029                               | 0.035                               | 0.402                                          | 5.62                                      | 22.7                                                   | 3.06                                                   | 0.695                                   | 9.51                            | 9.32                                        | 15.7                            |
| 0.8                   | 0.204                                              | 2.81                                               | 2.62                                               | 1.36                            | 32.4                                | 28.3                                            | 9.06                                                     | 23.1                                                   | 32.5                                                   | 0.047                                             | 0.043                               | 0.051                               | 0.590                                          | 7.72                                      | 31.4                                                   | 4.31                                                   | 1.04                                    | 13.1                            | 13.9                                        | 22.4                            |
| 1                     | 0.251                                              | 3.60                                               | 3.39                                               | 1.73                            | 42.5                                | 36.0                                            | 12.6                                                     | 28.5                                                   | 40.4                                                   | 0.060                                             | 0.051                               | 0.056                               | 0.688                                          | 10.4                                      | 40.3                                                   | 5.65                                                   | 1.28                                    | 16.0                            | 17.3                                        | 28.4                            |
| <i>R</i> <sup>2</sup> | <b>0.995</b>                                       | <b>0.995</b>                                       | <b>0.994</b>                                       | <b>0.994</b>                    | <b>0.991</b>                        | <b>0.995</b>                                    | <b>0.976</b>                                             | <b>0.996</b>                                           | <b>0.996</b>                                           | <b>0.993</b>                                      | <b>0.993</b>                        | <b>0.972</b>                        | <b>0.991</b>                                   | <b>0.992</b>                              | <b>0.994</b>                                           | <b>0.993</b>                                           | <b>0.995</b>                            | <b>0.997</b>                    | <b>0.993</b>                                | <b>0.996</b>                    |

**Table S4.** SIFT-MS linearity data for Class 2B solvents across the concentration levels 0.2 to 1.0. SIFT-MS response is the headspace concentration in ppmV.

| Concentration Level  | Chloroform<br>(O <sub>2</sub> <sup>+</sup> 83) | Chloroform<br>(O <sub>2</sub> <sup>+</sup> 85) | 1,2-Dimethoxyethane<br>(H <sub>3</sub> O <sup>+</sup> 91) | 1,2-Dimethoxyethane<br>(NO <sup>+</sup> 89) | Hexane<br>(NO <sup>+</sup> 85) | Methylbutylketone<br>(NO <sup>+</sup> 130) | Nitromethane<br>(H <sub>3</sub> O <sup>+</sup> 62) | Pyridine<br>(H <sub>3</sub> O <sup>+</sup> 80) | Tetralin<br>(NO <sup>+</sup> 132) | Tetralin<br>(O <sub>2</sub> <sup>+</sup> 104) | Trichloroethylene<br>(O <sub>2</sub> <sup>+</sup> 130) | Trichloroethylene<br>(O <sub>2</sub> <sup>+</sup> 132) |
|----------------------|------------------------------------------------|------------------------------------------------|-----------------------------------------------------------|---------------------------------------------|--------------------------------|--------------------------------------------|----------------------------------------------------|------------------------------------------------|-----------------------------------|-----------------------------------------------|--------------------------------------------------------|--------------------------------------------------------|
| 0.2                  | 1.87                                           | 0.88                                           | 0.124                                                     | 0.005                                       | 0.205                          | 0.017                                      | 0.005                                              | 0.006                                          | 0.137                             | 0.147                                         | 0.164                                                  | 0.399                                                  |
| 0.4                  | 3.03                                           | 1.57                                           | 0.218                                                     | 0.011                                       | 0.312                          | 0.032                                      | 0.010                                              | 0.014                                          | 0.254                             | 0.270                                         | 0.295                                                  | 0.765                                                  |
| 0.6                  | 5.46                                           | 2.56                                           | 0.376                                                     | 0.018                                       | 0.598                          | 0.050                                      | 0.015                                              | 0.025                                          | 0.440                             | 0.485                                         | 0.541                                                  | 1.41                                                   |
| 0.8                  | 7.79                                           | 3.56                                           | 0.503                                                     | 0.025                                       | 0.794                          | 0.071                                      | 0.023                                              | 0.039                                          | 0.645                             | 0.688                                         | 0.757                                                  | 2.13                                                   |
| 1                    | 10.4                                           | 4.64                                           | 0.627                                                     | 0.032                                       | 1.02                           | 0.090                                      | 0.029                                              | 0.051                                          | 0.810                             | 0.866                                         | 0.967                                                  | 2.82                                                   |
| <b>R<sup>2</sup></b> | <b>0.986</b>                                   | <b>0.994</b>                                   | <b>0.996</b>                                              | <b>0.999</b>                                | <b>0.987</b>                   | <b>0.996</b>                               | <b>0.993</b>                                       | <b>0.992</b>                                   | <b>0.993</b>                      | <b>0.994</b>                                  | <b>0.993</b>                                           | <b>0.988</b>                                           |

**Table S5.** GC-FID linearity data for Class 2A solvents across the concentration levels 0.2 to 1.0. GC-FID response is peak area. Gray values are not included in calculation of the linear regression coefficient,  $R^2$ .

| Concentration Level | Acetonitrile | Chlorobenzene | Cumene       | Cyclohexane  | 1,2-Dichloroethene | 1,4-Dioxane  | Methanol     | Methylcyclohexane | Methylene chloride | Tetrahydrofuran | Toluene      | Xylene       |
|---------------------|--------------|---------------|--------------|--------------|--------------------|--------------|--------------|-------------------|--------------------|-----------------|--------------|--------------|
| 0.2                 | 26352        | 1398280       | 386063       | 12264657     | 2007969            | 8324         | 62394        | 3684143           | 502816             | 1620569         | 5718237      | 6685712      |
| 0.4                 | 46001        | 2264558       | 516951       | 18427392     | 3480099            | 17038        | 122188       | 5053745           | 852648             | 2901097         | 9542764      | 10146391     |
| 0.6                 | 72255        | 3540812       | 813707       | 27743840     | 5166345            | 26725        | 194393       | 7698166           | 1315194            | 4370155         | 14621950     | 15824366     |
| 0.8                 | 95148        | 4921204       | 1160739      | 37788433     | 6931718            | 37925        | 264046       | 11149814          | 1785599            | 5899704         | 19814090     | 21887560     |
| 1                   | 86494        | 5640296       | 1204886      | 41735663     | 8289759            | 30686        | 203853       | 11159772          | 2069340            | 6960050         | 22944892     | 24404144     |
| $R^2$               | <b>0.997</b> | <b>0.990</b>  | <b>0.956</b> | <b>0.984</b> | <b>0.998</b>       | <b>0.997</b> | <b>0.998</b> | <b>0.943</b>      | <b>0.994</b>       | <b>0.997</b>    | <b>0.994</b> | <b>0.984</b> |

**Table S6.** GC-FID linearity data for Class 2B solvents across the concentration levels 0.2 to 1.0. GC-FID response is peak area. Gray values are not included in calculation of the linear regression coefficient,  $R^2$ .

| Concentration Level | Chloroform   | 1,2-Dimethoxyethane | Hexane       | Methylbutylketone | Nitromethane | Pyridine     | Tetralin     | Trichloroethylene |
|---------------------|--------------|---------------------|--------------|-------------------|--------------|--------------|--------------|-------------------|
| 0.2                 | 366116       | 18965               | 595394       | 44537             | 4587         | 4084         | 561991       | 126248            |
| 0.4                 | 600573       | 26759               | 993657       | 70460             | 8073         | 13874        | 960476       | 204932            |
| 0.6                 | 971247       | 36331               | 1442340      | 114791            | 10560        | 25599        | 1480855      | 306953            |
| 0.8                 | 1358627      | 39338               | 1952682      | 162888            | 14707        | 40171        | 2045261      | 423603            |
| 1                   | 1453777      | 37075               | 2374673      | 180496            | 16826        | 31369        | 2311282      | 506267            |
| $R^2$               | <b>0.973</b> | <b>0.964</b>        | <b>0.998</b> | <b>0.981</b>      | <b>0.992</b> | <b>0.992</b> | <b>0.990</b> | <b>0.996</b>      |



## C. Repeatability

**Table S7a.** SIFT-MS repeatability data for Class 2A solvents (Run 1) at concentration level 1.0. SIFT-MS response is the headspace concentration in ppmV.

| Replicate Number and Statistical Parameters | Acetonitrile<br>(H <sub>3</sub> O <sup>+</sup> 42) | Chlorobenzene<br>(O <sub>2</sub> <sup>+</sup> 112) | Chlorobenzene<br>(O <sub>2</sub> <sup>+</sup> 114) | Cumene<br>(NO <sup>+</sup> 120) | Cyclohexane<br>(NO <sup>+</sup> 83) | Cyclohexane<br>(O <sub>2</sub> <sup>+</sup> 84) | 1,2-Dichloroethene<br>(H <sub>3</sub> O <sup>+</sup> 99) | 1,2-Dichloroethene<br>(O <sub>2</sub> <sup>+</sup> 96) | 1,2-Dichloroethene<br>(O <sub>2</sub> <sup>+</sup> 98) | 1,4-Dioxane<br>(H <sub>3</sub> O <sup>+</sup> 89) | 1,4-Dioxane<br>(NO <sup>+</sup> 87) | 1,4-Dioxane<br>(NO <sup>+</sup> 88) | Methanol<br>(H <sub>3</sub> O <sup>+</sup> 33) | Methylcyclohexane<br>(NO <sup>+</sup> 97) | Methylene chloride<br>(O <sub>2</sub> <sup>+</sup> 84) | Methylene chloride<br>(O <sub>2</sub> <sup>+</sup> 86) | Tetrahydrofuran<br>(NO <sup>+</sup> 71) | Toluene<br>(NO <sup>+</sup> 92) | Toluene<br>(O <sub>2</sub> <sup>+</sup> 92) | Xylene<br>(NO <sup>+</sup> 106) |
|---------------------------------------------|----------------------------------------------------|----------------------------------------------------|----------------------------------------------------|---------------------------------|-------------------------------------|-------------------------------------------------|----------------------------------------------------------|--------------------------------------------------------|--------------------------------------------------------|---------------------------------------------------|-------------------------------------|-------------------------------------|------------------------------------------------|-------------------------------------------|--------------------------------------------------------|--------------------------------------------------------|-----------------------------------------|---------------------------------|---------------------------------------------|---------------------------------|
| Repl. 1                                     | 0.265                                              | 3.75                                               | 3.62                                               | 2.06                            | 50.5                                | 42.5                                            | 13.6                                                     | 28.0                                                   | 43.8                                                   | 0.061                                             | 0.052                               | 0.055                               | 0.741                                          | 13.3                                      | 48.4                                                   | 6.15                                                   | 1.35                                    | 16.1                            | 17.5                                        | 31.4                            |
| Repl. 2                                     | 0.249                                              | 3.50                                               | 3.38                                               | 1.82                            | 45.4                                | 37.8                                            | 13.0                                                     | 27.3                                                   | 41.0                                                   | 0.055                                             | 0.054                               | 0.054                               | 0.694                                          | 11.5                                      | 42.9                                                   | 5.87                                                   | 1.30                                    | 15.6                            | 17.1                                        | 28.7                            |
| Repl. 3                                     | 0.276                                              | 3.72                                               | 3.53                                               | 1.85                            | 43.5                                | 37.6                                            | 11.6                                                     | 28.3                                                   | 42.1                                                   | 0.069                                             | 0.056                               | 0.063                               | 0.796                                          | 11.4                                      | 42.6                                                   | 5.69                                                   | 1.39                                    | 16.2                            | 17.7                                        | 29.6                            |
| Repl. 4                                     | 0.247                                              | 3.44                                               | 3.32                                               | 1.79                            | 43.9                                | 38.4                                            | 12.2                                                     | 27.4                                                   | 40.5                                                   | 0.052                                             | 0.049                               | 0.058                               | 0.683                                          | 11.2                                      | 43.0                                                   | 5.81                                                   | 1.24                                    | 15.5                            | 16.9                                        | 28.1                            |
| Repl. 5                                     | 0.242                                              | 3.54                                               | 3.29                                               | 1.81                            | 43.4                                | 37.8                                            | 11.4                                                     | 27.3                                                   | 40.1                                                   | 0.055                                             | 0.053                               | 0.064                               | 0.711                                          | 11.4                                      | 42.6                                                   | 5.60                                                   | 1.25                                    | 15.3                            | 16.9                                        | 28.3                            |
| Repl. 6                                     | 0.267                                              | 3.67                                               | 3.47                                               | 1.95                            | 44.2                                | 38.7                                            | 11.6                                                     | 27.6                                                   | 42.3                                                   | 0.061                                             | 0.058                               | 0.063                               | 0.783                                          | 12.0                                      | 43.9                                                   | 5.72                                                   | 1.36                                    | 16.0                            | 17.3                                        | 29.6                            |
| <b>Mean</b>                                 | <b>0.258</b>                                       | <b>3.60</b>                                        | <b>3.43</b>                                        | <b>1.88</b>                     | <b>45.1</b>                         | <b>38.8</b>                                     | <b>12.3</b>                                              | <b>27.6</b>                                            | <b>41.6</b>                                            | <b>0.059</b>                                      | <b>0.054</b>                        | <b>0.060</b>                        | <b>0.734</b>                                   | <b>11.8</b>                               | <b>43.9</b>                                            | <b>5.81</b>                                            | <b>1.31</b>                             | <b>15.8</b>                     | <b>17.2</b>                                 | <b>29.3</b>                     |
| <b>SD</b>                                   | <b>0.012</b>                                       | <b>0.116</b>                                       | <b>0.117</b>                                       | <b>0.096</b>                    | <b>2.481</b>                        | <b>1.698</b>                                    | <b>0.812</b>                                             | <b>0.377</b>                                           | <b>1.251</b>                                           | <b>0.006</b>                                      | <b>0.003</b>                        | <b>0.004</b>                        | <b>0.043</b>                                   | <b>0.714</b>                              | <b>2.059</b>                                           | <b>0.176</b>                                           | <b>0.056</b>                            | <b>0.334</b>                    | <b>0.298</b>                                | <b>1.112</b>                    |
| <b>%RSD</b>                                 | <b>4.8</b>                                         | <b>3.2</b>                                         | <b>3.4</b>                                         | <b>5.1</b>                      | <b>5.5</b>                          | <b>4.4</b>                                      | <b>6.6</b>                                               | <b>1.4</b>                                             | <b>3.0</b>                                             | <b>9.5</b>                                        | <b>5.3</b>                          | <b>7.1</b>                          | <b>5.8</b>                                     | <b>6.1</b>                                | <b>4.7</b>                                             | <b>3.0</b>                                             | <b>4.3</b>                              | <b>2.1</b>                      | <b>1.7</b>                                  | <b>3.8</b>                      |

**Table S7b.** SIFT-MS repeatability data for Class 2A solvents (Run 2) at concentration level 1.0 made in triplicate before and after the Run 2 accuracy and recovery exercise. SIFT-MS response is the headspace concentration in ppmV. Additional calculations on pre- and post-run triplicate measurements (compared to Run 1; Table S5a) illustrate the challenge of this method (loss of volatiles causing drift).

| Replicate Number and Statistical Parameters | Acetonitrile<br>(H <sub>3</sub> O <sup>+</sup> 42) | Chlorobenzene<br>(O <sub>2</sub> <sup>+</sup> 112) | Chlorobenzene<br>(O <sub>2</sub> <sup>+</sup> 114) | Cumene<br>(NO <sup>+</sup> 120) | Cyclohexane<br>(NO <sup>+</sup> 83) | Cyclohexane<br>(O <sub>2</sub> <sup>+</sup> 84) | 1,2-Dichloroethene<br>(H <sub>3</sub> O <sup>+</sup> 99) | 1,2-Dichloroethene<br>(O <sub>2</sub> <sup>+</sup> 96) | 1,2-Dichloroethene<br>(O <sub>2</sub> <sup>+</sup> 98) | 1,4-Dioxane<br>(H <sub>3</sub> O <sup>+</sup> 89) | 1,4-Dioxane<br>(NO <sup>+</sup> 87) | 1,4-Dioxane<br>(NO <sup>+</sup> 88) | Methanol<br>(H <sub>3</sub> O <sup>+</sup> 33) | Methylcyclohexane<br>(NO <sup>+</sup> 97) | Methylene chloride<br>(O <sub>2</sub> <sup>+</sup> 84) | Methylene chloride<br>(O <sub>2</sub> <sup>+</sup> 86) | Tetrahydrofuran<br>(NO <sup>+</sup> 71) | Toluene<br>(NO <sup>+</sup> 92) | Toluene<br>(O <sub>2</sub> <sup>+</sup> 92) | Xylene<br>(NO <sup>+</sup> 106) |
|---------------------------------------------|----------------------------------------------------|----------------------------------------------------|----------------------------------------------------|---------------------------------|-------------------------------------|-------------------------------------------------|----------------------------------------------------------|--------------------------------------------------------|--------------------------------------------------------|---------------------------------------------------|-------------------------------------|-------------------------------------|------------------------------------------------|-------------------------------------------|--------------------------------------------------------|--------------------------------------------------------|-----------------------------------------|---------------------------------|---------------------------------------------|---------------------------------|
| Repl. 1 (Pre)                               | 0.287                                              | 3.53                                               | 3.31                                               | 1.73                            | 25.5                                | 22.7                                            | 9.12                                                     | 26.8                                                   | 35.1                                                   | 0.064                                             | 0.061                               | 0.210                               | 0.773                                          | 7.05                                      | 26.4                                                   | 19.9                                                   | 1.50                                    | 16.4                            | 17.2                                        | 29.4                            |
| Repl. 2 (Pre)                               | 0.262                                              | 3.47                                               | 3.32                                               | 1.75                            | 28.5                                | 23.7                                            | 11.3                                                     | 26.7                                                   | 34.5                                                   | 0.064                                             | 0.060                               | 0.188                               | 0.700                                          | 7.24                                      | 27.6                                                   | 19.5                                                   | 1.38                                    | 16.9                            | 17.4                                        | 29.5                            |
| Repl. 3 (Pre)                               | 0.259                                              | 3.33                                               | 3.16                                               | 1.77                            | 26.9                                | 23.2                                            | 8.97                                                     | 25.6                                                   | 34.5                                                   | 0.057                                             | 0.054                               | 0.178                               | 0.703                                          | 7.55                                      | 26.9                                                   | 18.2                                                   | 1.28                                    | 16.1                            | 16.5                                        | 29.1                            |
| Repl. 4 (Post)                              | 0.253                                              | 3.12                                               | 2.98                                               | 1.42                            | 22.1                                | 19.5                                            | 8.61                                                     | 24.2                                                   | 30.7                                                   | 0.057                                             | 0.058                               | 0.184                               | 0.697                                          | 5.39                                      | 22.3                                                   | 17.8                                                   | 1.32                                    | 15.0                            | 15.2                                        | 25.6                            |
| Repl. 5 (Post)                              | 0.278                                              | 3.16                                               | 3.01                                               | 1.44                            | 20.7                                | 18.7                                            | 7.25                                                     | 24.1                                                   | 30.8                                                   | 0.063                                             | 0.055                               | 0.209                               | 0.758                                          | 5.20                                      | 21.4                                                   | 18.5                                                   | 1.44                                    | 14.9                            | 15.3                                        | 26.1                            |
| Repl. 6 (Post)                              | 0.251                                              | 3.08                                               | 2.92                                               | 1.41                            | 22.3                                | 19.3                                            | 9.76                                                     | 24.0                                                   | 30.2                                                   | 0.059                                             | 0.052                               | 0.191                               | 0.681                                          | 5.23                                      | 22.2                                                   | 17.9                                                   | 1.32                                    | 14.8                            | 15.1                                        | 25.2                            |
| <b>Mean (All)</b>                           | <b>0.265</b>                                       | <b>3.28</b>                                        | <b>3.11</b>                                        | <b>1.59</b>                     | <b>24.3</b>                         | <b>21.2</b>                                     | <b>9.18</b>                                              | <b>25.2</b>                                            | <b>32.6</b>                                            | <b>0.061</b>                                      | <b>0.057</b>                        | <b>0.194</b>                        | <b>0.718</b>                                   | <b>6.28</b>                               | <b>24.5</b>                                            | <b>18.6</b>                                            | <b>1.37</b>                             | <b>15.7</b>                     | <b>16.1</b>                                 | <b>27.5</b>                     |
| <b>SD (All)</b>                             | <b>0.013</b>                                       | <b>0.174</b>                                       | <b>0.158</b>                                       | <b>0.164</b>                    | <b>2.82</b>                         | <b>2.05</b>                                     | <b>1.23</b>                                              | <b>1.20</b>                                            | <b>2.08</b>                                            | <b>0.003</b>                                      | <b>0.003</b>                        | <b>0.012</b>                        | <b>0.034</b>                                   | <b>1.02</b>                               | <b>2.54</b>                                            | <b>0.80</b>                                            | <b>0.076</b>                            | <b>0.819</b>                    | <b>0.958</b>                                | <b>1.87</b>                     |
| <b>%RSD (All)</b>                           | <b>5.0</b>                                         | <b>5.3</b>                                         | <b>5.1</b>                                         | <b>10.3</b>                     | <b>11.6</b>                         | <b>9.7</b>                                      | <b>13.4</b>                                              | <b>4.7</b>                                             | <b>6.4</b>                                             | <b>5.0</b>                                        | <b>5.6</b>                          | <b>6.3</b>                          | <b>4.7</b>                                     | <b>16.2</b>                               | <b>10.4</b>                                            | <b>4.3</b>                                             | <b>5.6</b>                              | <b>5.2</b>                      | <b>5.9</b>                                  | <b>6.8</b>                      |
| <b>Mean (Pre)</b>                           | <b>0.270</b>                                       | <b>3.44</b>                                        | <b>3.26</b>                                        | <b>1.75</b>                     | <b>27.0</b>                         | <b>23.2</b>                                     | <b>9.81</b>                                              | <b>26.4</b>                                            | <b>34.7</b>                                            | <b>0.062</b>                                      | <b>0.059</b>                        | <b>0.192</b>                        | <b>0.725</b>                                   | <b>7.28</b>                               | <b>27.0</b>                                            | <b>19.2</b>                                            | <b>1.39</b>                             | <b>16.5</b>                     | <b>17.0</b>                                 | <b>29.4</b>                     |
| <b>SD (Pre)</b>                             | <b>0.013</b>                                       | <b>0.084</b>                                       | <b>0.073</b>                                       | <b>0.016</b>                    | <b>1.23</b>                         | <b>0.41</b>                                     | <b>1.08</b>                                              | <b>0.54</b>                                            | <b>0.28</b>                                            | <b>0.003</b>                                      | <b>0.003</b>                        | <b>0.013</b>                        | <b>0.034</b>                                   | <b>0.21</b>                               | <b>0.49</b>                                            | <b>0.73</b>                                            | <b>0.090</b>                            | <b>0.330</b>                    | <b>0.386</b>                                | <b>0.17</b>                     |
| <b>%RSD (Pre)</b>                           | <b>4.7</b>                                         | <b>2.4</b>                                         | <b>2.2</b>                                         | <b>0.93</b>                     | <b>4.5</b>                          | <b>1.8</b>                                      | <b>11.0</b>                                              | <b>2.1</b>                                             | <b>0.82</b>                                            | <b>5.4</b>                                        | <b>5.2</b>                          | <b>7.0</b>                          | <b>4.7</b>                                     | <b>2.8</b>                                | <b>1.8</b>                                             | <b>3.8</b>                                             | <b>6.5</b>                              | <b>2.0</b>                      | <b>2.3</b>                                  | <b>0.58</b>                     |
| <b>Mean (Post)</b>                          | <b>0.261</b>                                       | <b>3.12</b>                                        | <b>2.97</b>                                        | <b>1.42</b>                     | <b>21.7</b>                         | <b>19.2</b>                                     | <b>8.54</b>                                              | <b>24.1</b>                                            | <b>30.6</b>                                            | <b>0.060</b>                                      | <b>0.055</b>                        | <b>0.195</b>                        | <b>0.712</b>                                   | <b>5.27</b>                               | <b>22.0</b>                                            | <b>18.1</b>                                            | <b>1.36</b>                             | <b>14.9</b>                     | <b>15.2</b>                                 | <b>25.7</b>                     |
| <b>SD (Post)</b>                            | <b>0.012</b>                                       | <b>0.033</b>                                       | <b>0.037</b>                                       | <b>0.012</b>                    | <b>0.71</b>                         | <b>0.34</b>                                     | <b>1.03</b>                                              | <b>0.08</b>                                            | <b>0.26</b>                                            | <b>0.002</b>                                      | <b>0.002</b>                        | <b>0.011</b>                        | <b>0.033</b>                                   | <b>0.08</b>                               | <b>0.40</b>                                            | <b>0.31</b>                                            | <b>0.057</b>                            | <b>0.082</b>                    | <b>0.082</b>                                | <b>0.37</b>                     |
| <b>%RSD (Post)</b>                          | <b>4.7</b>                                         | <b>1.0</b>                                         | <b>1.3</b>                                         | <b>0.88</b>                     | <b>3.3</b>                          | <b>1.8</b>                                      | <b>12.0</b>                                              | <b>0.34</b>                                            | <b>0.86</b>                                            | <b>3.9</b>                                        | <b>3.9</b>                          | <b>5.4</b>                          | <b>4.7</b>                                     | <b>1.6</b>                                | <b>1.8</b>                                             | <b>1.7</b>                                             | <b>4.2</b>                              | <b>0.55</b>                     | <b>0.54</b>                                 | <b>1.4</b>                      |
| <b>%Drift*</b>                              | <b>96.8</b>                                        | <b>90.6</b>                                        | <b>91.0</b>                                        | <b>81.3</b>                     | <b>80.5</b>                         | <b>82.6</b>                                     | <b>87.1</b>                                              | <b>91.4</b>                                            | <b>88.1</b>                                            | <b>96.8</b>                                       | <b>94.1</b>                         | <b>101.4</b>                        | <b>98.2</b>                                    | <b>72.4</b>                               | <b>81.4</b>                                            | <b>94.1</b>                                            | <b>98.1</b>                             | <b>90.5</b>                     | <b>89.2</b>                                 | <b>87.4</b>                     |

\* Drift of post-run calibration replicates compared to pre-run calibration replicates.

**Table S8a.** SIFT-MS repeatability data for Class 2B solvents (Run 1) at concentration level 1.0. SIFT-MS response is the headspace concentration in ppmV.

| Replicate Number and Statistical Parameters | Chloroform (O <sub>2</sub> <sup>+</sup> 83) | Chloroform (O <sub>2</sub> <sup>+</sup> 85) | 1,2-Dimethoxyethane (H <sub>3</sub> O <sup>+</sup> 91) | 1,2-Dimethoxyethane (NO <sup>+</sup> 89) | Hexane (NO <sup>+</sup> 85) | Methylbutylketone (NO <sup>+</sup> 130) | Nitromethane (H <sub>3</sub> O <sup>+</sup> 62) | Pyridine (H <sub>3</sub> O <sup>+</sup> 80) | Tetralin (NO <sup>+</sup> 132) | Tetralin (O <sub>2</sub> <sup>+</sup> 104) | Trichloroethylene (O <sub>2</sub> <sup>+</sup> 130) | Trichloroethylene (O <sub>2</sub> <sup>+</sup> 132) |
|---------------------------------------------|---------------------------------------------|---------------------------------------------|--------------------------------------------------------|------------------------------------------|-----------------------------|-----------------------------------------|-------------------------------------------------|---------------------------------------------|--------------------------------|--------------------------------------------|-----------------------------------------------------|-----------------------------------------------------|
| Repl. 1                                     | 13.2                                        | 5.22                                        | 0.714                                                  | 0.034                                    | 1.12                        | 0.093                                   | 0.028                                           | 0.058                                       | 0.861                          | 0.925                                      | 1.02                                                | 3.04                                                |
| Repl. 2                                     | 11.5                                        | 4.80                                        | 0.619                                                  | 0.033                                    | 1.16                        | 0.091                                   | 0.030                                           | 0.053                                       | 0.862                          | 0.914                                      | 1.05                                                | 2.97                                                |
| Repl. 3                                     | 11.4                                        | 4.74                                        | 0.749                                                  | 0.035                                    | 0.983                       | 0.102                                   | 0.031                                           | 0.063                                       | 0.908                          | 0.967                                      | 1.06                                                | 3.19                                                |
| Repl. 4                                     | 11.1                                        | 4.83                                        | 0.618                                                  | 0.034                                    | 1.05                        | 0.091                                   | 0.029                                           | 0.052                                       | 0.822                          | 0.904                                      | 1.05                                                | 2.95                                                |
| Repl. 5                                     | 11.2                                        | 4.70                                        | 0.646                                                  | 0.034                                    | 1.04                        | 0.094                                   | 0.029                                           | 0.057                                       | 0.849                          | 0.887                                      | 1.04                                                | 2.96                                                |
| Repl. 6                                     | 11.8                                        | 4.90                                        | 0.693                                                  | 0.038                                    | 1.01                        | 0.095                                   | 0.029                                           | 0.061                                       | 0.886                          | 0.928                                      | 1.07                                                | 3.05                                                |
| <b>Mean</b>                                 | <b>11.7</b>                                 | <b>4.87</b>                                 | <b>0.674</b>                                           | <b>0.035</b>                             | <b>1.06</b>                 | <b>0.094</b>                            | <b>0.029</b>                                    | <b>0.057</b>                                | <b>0.864</b>                   | <b>0.921</b>                               | <b>1.05</b>                                         | <b>3.03</b>                                         |
| <b>SD</b>                                   | <b>0.707</b>                                | <b>0.171</b>                                | <b>0.049</b>                                           | <b>0.002</b>                             | <b>0.062</b>                | <b>0.004</b>                            | <b>0.001</b>                                    | <b>0.004</b>                                | <b>0.027</b>                   | <b>0.025</b>                               | <b>0.016</b>                                        | <b>0.083</b>                                        |
| <b>%RSD</b>                                 | <b>6.0</b>                                  | <b>3.5</b>                                  | <b>7.3</b>                                             | <b>5.3</b>                               | <b>5.8</b>                  | <b>3.9</b>                              | <b>3.8</b>                                      | <b>6.8</b>                                  | <b>3.1</b>                     | <b>2.7</b>                                 | <b>1.5</b>                                          | <b>2.7</b>                                          |

**Table S8b.** SIFT-MS repeatability data for Class 2B solvents (Run 2) at concentration level 1.0 made in triplicate before and after the Run 2 accuracy and recovery exercise. SIFT-MS response is the headspace concentration in ppmV. Additional calculations on pre- and post-run triplicate measurements (compared to Run 1; Table S6a) illustrate the challenge of this method (loss of volatiles causing drift).

| Replicate Number and Statistical Parameters | Chloroform (O <sub>2</sub> <sup>+</sup> 83) | Chloroform (O <sub>2</sub> <sup>+</sup> 85) | 1,2-Dimethoxyethane (H <sub>3</sub> O <sup>+</sup> 91) | 1,2-Dimethoxyethane (NO <sup>+</sup> 89) | Hexane (NO <sup>+</sup> 85) | Methylbutylketone (NO <sup>+</sup> 130) | Nitromethane (H <sub>3</sub> O <sup>+</sup> 62) | Pyridine (H <sub>3</sub> O <sup>+</sup> 80) | Tetralin (NO <sup>+</sup> 132) | Tetralin (O <sub>2</sub> <sup>+</sup> 104) | Trichloroethylene (O <sub>2</sub> <sup>+</sup> 130) | Trichloroethylene (O <sub>2</sub> <sup>+</sup> 132) |
|---------------------------------------------|---------------------------------------------|---------------------------------------------|--------------------------------------------------------|------------------------------------------|-----------------------------|-----------------------------------------|-------------------------------------------------|---------------------------------------------|--------------------------------|--------------------------------------------|-----------------------------------------------------|-----------------------------------------------------|
| Repl. 1 (Pre)                               | 7.62                                        | 19.0                                        | 0.637                                                  | 0.043                                    | 5.39                        | 10.4                                    | 0.032                                           | 0.052                                       | 1.05                           | 0.970                                      | 1.28                                                | 3.57                                                |
| Repl. 2 (Pre)                               | 7.96                                        | 18.1                                        | 0.621                                                  | 0.037                                    | 5.79                        | 9.90                                    | 0.030                                           | 0.056                                       | 1.03                           | 0.906                                      | 1.25                                                | 3.41                                                |
| Repl. 3 (Pre)                               | 7.84                                        | 17.2                                        | 0.609                                                  | 0.036                                    | 4.99                        | 9.51                                    | 0.029                                           | 0.058                                       | 0.976                          | 0.886                                      | 1.20                                                | 3.24                                                |
| Repl. 4 (Post)                              | 6.17                                        | 16.8                                        | 0.559                                                  | 0.038                                    | 5.21                        | 9.51                                    | 0.029                                           | 0.058                                       | 0.957                          | 0.858                                      | 1.07                                                | 3.08                                                |
| Repl. 5 (Post)                              | 5.90                                        | 17.8                                        | 0.594                                                  | 0.040                                    | 5.05                        | 10.2                                    | 0.033                                           | 0.064                                       | 0.945                          | 0.862                                      | 1.09                                                | 3.09                                                |
| Repl. 6 (Post)                              | 6.13                                        | 16.8                                        | 0.547                                                  | 0.035                                    | 5.35                        | 9.38                                    | 0.031                                           | 0.057                                       | 0.915                          | 0.842                                      | 1.09                                                | 3.00                                                |
| <b>Mean (All)</b>                           | <b>6.94</b>                                 | <b>17.6</b>                                 | <b>0.595</b>                                           | <b>0.038</b>                             | <b>5.30</b>                 | <b>9.82</b>                             | <b>0.031</b>                                    | <b>0.057</b>                                | <b>0.979</b>                   | <b>0.887</b>                               | <b>1.16</b>                                         | <b>3.23</b>                                         |
| <b>SD (All)</b>                             | <b>0.88</b>                                 | <b>0.784</b>                                | <b>0.032</b>                                           | <b>0.003</b>                             | <b>0.264</b>                | <b>0.381</b>                            | <b>0.001</b>                                    | <b>0.004</b>                                | <b>0.047</b>                   | <b>0.042</b>                               | <b>0.084</b>                                        | <b>0.201</b>                                        |
| <b>%RSD (All)</b>                           | <b>12.7</b>                                 | <b>4.5</b>                                  | <b>5.4</b>                                             | <b>6.9</b>                               | <b>5.0</b>                  | <b>3.9</b>                              | <b>4.8</b>                                      | <b>6.3</b>                                  | <b>4.8</b>                     | <b>4.8</b>                                 | <b>7.2</b>                                          | <b>6.2</b>                                          |
| <b>Mean (Pre)</b>                           | <b>7.81</b>                                 | <b>18.1</b>                                 | <b>0.623</b>                                           | <b>0.039</b>                             | <b>5.39</b>                 | <b>9.94</b>                             | <b>0.030</b>                                    | <b>0.055</b>                                | <b>1.02</b>                    | <b>0.921</b>                               | <b>1.24</b>                                         | <b>3.41</b>                                         |
| <b>SD (Pre)</b>                             | <b>0.14</b>                                 | <b>0.735</b>                                | <b>0.011</b>                                           | <b>0.003</b>                             | <b>0.327</b>                | <b>0.364</b>                            | <b>0.001</b>                                    | <b>0.003</b>                                | <b>0.031</b>                   | <b>0.036</b>                               | <b>0.033</b>                                        | <b>0.135</b>                                        |
| <b>%RSD (Pre)</b>                           | <b>1.8</b>                                  | <b>4.1</b>                                  | <b>1.8</b>                                             | <b>7.3</b>                               | <b>6.1</b>                  | <b>3.7</b>                              | <b>4.2</b>                                      | <b>4.8</b>                                  | <b>3.0</b>                     | <b>3.9</b>                                 | <b>2.7</b>                                          | <b>4.0</b>                                          |
| <b>Mean (Post)</b>                          | <b>6.07</b>                                 | <b>17.1</b>                                 | <b>0.567</b>                                           | <b>0.038</b>                             | <b>5.20</b>                 | <b>9.70</b>                             | <b>0.031</b>                                    | <b>0.059</b>                                | <b>0.939</b>                   | <b>0.854</b>                               | <b>1.08</b>                                         | <b>3.06</b>                                         |
| <b>SD (Post)</b>                            | <b>0.12</b>                                 | <b>0.471</b>                                | <b>0.020</b>                                           | <b>0.002</b>                             | <b>0.123</b>                | <b>0.360</b>                            | <b>0.002</b>                                    | <b>0.003</b>                                | <b>0.018</b>                   | <b>0.009</b>                               | <b>0.009</b>                                        | <b>0.040</b>                                        |
| <b>%RSD (Post)</b>                          | <b>2.0</b>                                  | <b>2.8</b>                                  | <b>3.5</b>                                             | <b>6.1</b>                               | <b>2.4</b>                  | <b>3.7</b>                              | <b>5.3</b>                                      | <b>5.5</b>                                  | <b>1.9</b>                     | <b>1.0</b>                                 | <b>0.87</b>                                         | <b>1.3</b>                                          |
| <b>%Drift*</b>                              | <b>77.7</b>                                 | <b>94.7</b>                                 | <b>91.1</b>                                            | <b>97.2</b>                              | <b>96.5</b>                 | <b>97.6</b>                             | <b>101.2</b>                                    | <b>107.3</b>                                | <b>92.2</b>                    | <b>92.8</b>                                | <b>87.1</b>                                         | <b>89.7</b>                                         |

\* Drift of post-run calibration replicates compared to pre-run calibration replicates.

**Table S9a.** GC-FID repeatability data for Class 2A solvents (Run 1) at concentration level 1.0. GC-FID response is peak area.

| Replicate number and<br>Statistical Parameters | Acetonitrile  | Chlorobenzene  | Cumene         | Cyclohexane     | 1,2-Dichloroethene | 1,4-Dioxane  | Methanol      | Methylcyclohexane | Methylene chloride | Tetrahydrofuran | Toluene         | Xylene          |
|------------------------------------------------|---------------|----------------|----------------|-----------------|--------------------|--------------|---------------|-------------------|--------------------|-----------------|-----------------|-----------------|
| Repl. 1                                        | 106406        | 6156678        | 1634687        | 55983390        | 8316799            | 46013        | 323222        | 17344731          | 2129041            | 7152420         | 24498135        | 28596751        |
| Repl. 2                                        | 127938        | 6169020        | 1619604        | 52234226        | 8207191            | 48293        | 333215        | 16380995          | 2143251            | 7142169         | 24558243        | 28678885        |
| Repl. 3                                        | 119200        | 5986326        | 1689513        | 48747764        | 7847819            | 42513        | 298512        | 15874989          | 2052739            | 6767718         | 23617614        | 28576446        |
| Repl. 4                                        | 116222        | 5806153        | 1435168        | 48176497        | 7989709            | 48412        | 325844        | 14462826          | 2099052            | 6914298         | 23471716        | 26427020        |
| Repl. 5                                        | 118219        | 5557151        | 1340987        | 44909775        | 7385105            | 43127        | 294075        | 13458818          | 2002259            | 6566068         | 22059820        | 24840337        |
| Repl. 6                                        | 119887        | 5818901        | 1423774        | 49251317        | 7935606            | 48607        | 339777        | 14839289          | 2089555            | 6971522         | 23454416        | 26405306        |
| <b>Mean</b>                                    | <b>117979</b> | <b>5915705</b> | <b>1523956</b> | <b>49883828</b> | <b>7947038</b>     | <b>46161</b> | <b>319108</b> | <b>15393608</b>   | <b>2085983</b>     | <b>6919033</b>  | <b>23609991</b> | <b>27254124</b> |
| <b>SD</b>                                      | <b>6948</b>   | <b>235439</b>  | <b>141574</b>  | <b>3796733</b>  | <b>326180</b>      | <b>2762</b>  | <b>18651</b>  | <b>1409296</b>    | <b>51831</b>       | <b>225618</b>   | <b>909329</b>   | <b>1610941</b>  |
| <b>%RSD</b>                                    | <b>5.9</b>    | <b>4.0</b>     | <b>9.3</b>     | <b>7.6</b>      | <b>4.1</b>         | <b>6.0</b>   | <b>5.8</b>    | <b>9.2</b>        | <b>2.5</b>         | <b>3.3</b>      | <b>3.9</b>      | <b>16.9</b>     |

**Table S9b.** GC-FID repeatability data for Class 2A solvents (Run 2) at concentration level 1.0 made in triplicate before and after the Run 2 accuracy and recovery exercise. GC-FID response is peak area. Additional calculations on pre- and post-run triplicate measurements (compared to Run 1; Table S7a) illustrate the challenge of this method (loss of volatiles causing drift).

| Replicate number and Statistical Parameters | Acetonitrile  | Chlorobenzene   | Cumene         | Cyclohexane     | 1,2-Dichloroethene | 1,4-Dioxane  | Methanol      | Methylcyclohexane | Methylene chloride | Tetrahydrofuran | Toluene         | Xylene          |
|---------------------------------------------|---------------|-----------------|----------------|-----------------|--------------------|--------------|---------------|-------------------|--------------------|-----------------|-----------------|-----------------|
| Repl. 1 (Pre)                               | 138880        | 30244247        | 1148420        | 30104446        | 9160888            | 43691        | 302030        | 9235683           | 2534491            | 8111590         | 24051895        | 46697190        |
| Repl. 2 (Pre)                               | 129593        | 27591122        | 1099128        | 29001868        | 8850326            | 44850        | 311127        | 8693071           | 2393998            | 7787489         | 23156224        | 45077593        |
| Repl. 3 (Pre)                               | 120948        | 24329202        | 1035220        | 28344618        | 8504294            | 42798        | 304108        | 8620192           | 2212566            | 7278461         | 21422395        | 42341034        |
| Repl. 4 (Post)                              | 119935        | 26708821        | 992404         | 23364145        | 7818686            | 41118        | 263703        | 6839052           | 2161526            | 6970211         | 21157863        | 42074166        |
| Repl. 5 (Post)                              | 125407        | 26162893        | 989238         | 24455694        | 8010406            | 44918        | 324296        | 7042886           | 2150601            | 7088581         | 21293446        | 42058758        |
| Repl. 6 (Post)                              | 120094        | 25392587        | 964376         | 24321590        | 7849333            | 41143        | 301152        | 7041625           | 2102629            | 6946797         | 20874285        | 41058470        |
| <b>Mean (All)</b>                           | <b>125810</b> | <b>26738145</b> | <b>1038131</b> | <b>26598727</b> | <b>8365656</b>     | <b>43086</b> | <b>301069</b> | <b>7912085</b>    | <b>2259302</b>     | <b>7363855</b>  | <b>21992685</b> | <b>43217869</b> |
| <b>SD (All)</b>                             | <b>7431</b>   | <b>2047712</b>  | <b>71853</b>   | <b>2875891</b>  | <b>561870</b>      | <b>1707</b>  | <b>20234</b>  | <b>1051463</b>    | <b>168510</b>      | <b>479695</b>   | <b>1292755</b>  | <b>2174750</b>  |
| <b>%RSD (All)</b>                           | <b>5.9</b>    | <b>7.7</b>      | <b>6.9</b>     | <b>10.8</b>     | <b>6.7</b>         | <b>4.0</b>   | <b>6.7</b>    | <b>13.3</b>       | <b>7.5</b>         | <b>6.5</b>      | <b>5.9</b>      | <b>5.0</b>      |
| <b>Mean (Pre)</b>                           | <b>129807</b> | <b>27388190</b> | <b>1094256</b> | <b>29150311</b> | <b>8838503</b>     | <b>43780</b> | <b>305755</b> | <b>8849649</b>    | <b>2380352</b>     | <b>7725847</b>  | <b>22876838</b> | <b>44705272</b> |
| <b>SD (Pre)</b>                             | <b>8968</b>   | <b>2962739</b>  | <b>56757</b>   | <b>889255</b>   | <b>328457</b>      | <b>1029</b>  | <b>4767</b>   | <b>336296</b>     | <b>161396</b>      | <b>419971</b>   | <b>1336828</b>  | <b>2201815</b>  |
| <b>%RSD (Pre)</b>                           | <b>6.9</b>    | <b>10.8</b>     | <b>5.2</b>     | <b>3.1</b>      | <b>3.7</b>         | <b>2.4</b>   | <b>1.6</b>    | <b>3.8</b>        | <b>6.8</b>         | <b>5.4</b>      | <b>5.8</b>      | <b>4.9</b>      |
| <b>Mean (Post)</b>                          | <b>121812</b> | <b>26088100</b> | <b>982006</b>  | <b>24047143</b> | <b>7892808</b>     | <b>42393</b> | <b>296384</b> | <b>6974521</b>    | <b>2138252</b>     | <b>7001863</b>  | <b>21108531</b> | <b>41730465</b> |
| <b>SD (Post)</b>                            | <b>3114</b>   | <b>661297</b>   | <b>15350</b>   | <b>595282</b>   | <b>102989</b>      | <b>2187</b>  | <b>30577</b>  | <b>117321</b>     | <b>31330</b>       | <b>76007</b>    | <b>213891</b>   | <b>582015</b>   |
| <b>%RSD (Post)</b>                          | <b>2.6</b>    | <b>2.5</b>      | <b>1.6</b>     | <b>2.5</b>      | <b>1.3</b>         | <b>5.2</b>   | <b>10.3</b>   | <b>1.7</b>        | <b>1.5</b>         | <b>1.1</b>      | <b>1.0</b>      | <b>1.4</b>      |
| <b>%Drift*</b>                              | <b>93.8</b>   | <b>95.3</b>     | <b>89.7</b>    | <b>82.5</b>     | <b>89.3</b>        | <b>96.8</b>  | <b>96.9</b>   | <b>78.8</b>       | <b>89.8</b>        | <b>90.6</b>     | <b>92.3</b>     | <b>93.3</b>     |

\* Drift of post-run calibration replicates compared to pre-run calibration replicates.

**Table S10a.** GC-FID repeatability data for Class 2B solvents (Run 1) at concentration level 1.0. GC-FID response is peak area.

| Replicate number and<br>Statistical Parameters | Chloroform     | 1,2-Dimethoxyethane | Hexane         | Methylbutylketone | Nitromethane | Pyridine     | Tetralin       | Trichloroethylene |
|------------------------------------------------|----------------|---------------------|----------------|-------------------|--------------|--------------|----------------|-------------------|
| Repl. 1                                        | 1662928        | 24198               | 2737812        | 193261            | 18348        | 51621        | 2619107        | 554045            |
| Repl. 2                                        | 1712191        | 24623               | 2669485        | 199435            | 17256        | 54494        | 2629491        | 588126            |
| Repl. 3                                        | 1630508        | 24141               | 2514837        | 186633            | 17173        | 45462        | 2562518        | 541875            |
| Repl. 4                                        | 1687218        | 22084               | 2506564        | 196848            | 17140        | 52577        | 2579421        | 551741            |
| Repl. 5                                        | 1629062        | 20334               | 2322488        | 182077            | 16085        | 44770        | 2454000        | 514223            |
| Repl. 6                                        | 1687874        | 22589               | 2520676        | 192998            | 17905        | 52529        | 2597046        | 542457            |
| <b>Mean</b>                                    | <b>1668297</b> | <b>22995</b>        | <b>2545310</b> | <b>191875</b>     | <b>17318</b> | <b>50242</b> | <b>2573597</b> | <b>548745</b>     |
| <b>SD</b>                                      | <b>33658</b>   | <b>1642</b>         | <b>145026</b>  | <b>6458</b>       | <b>772</b>   | <b>4085</b>  | <b>63569</b>   | <b>23943</b>      |
| <b>%RSD</b>                                    | <b>2.0</b>     | <b>7.1</b>          | <b>5.7</b>     | <b>3.4</b>        | <b>4.5</b>   | <b>8.1</b>   | <b>2.5</b>     | <b>4.4</b>        |

**Table S10b.** GC-FID repeatability data for Class 2B solvents (Run 2) at concentration level 1.0 made in triplicate before and after the Run 2 accuracy and recovery exercise. GC-FID response is peak area. Additional calculations on pre- and post-run triplicate measurements (compared to Run 1; Table S8a) illustrate the challenge of this method (loss of volatiles causing drift)

| Replicate number and Statistical Parameters | Chloroform     | 1,2-Dimethoxyethane | Hexane         | Methylbutylketone | Nitromethane | Pyridine        | Tetralin       | Trichloroethylene |
|---------------------------------------------|----------------|---------------------|----------------|-------------------|--------------|-----------------|----------------|-------------------|
| Repl. 1 (Pre)                               | 1867255        | 1264                | 5952698        | 239907            | 28032        | 24051895        | 3111103        | 671269            |
| Repl. 2 (Pre)                               | 1716544        | 1161                | 5746273        | 212631            | 26609        | 23156224        | 2884574        | 627923            |
| Repl. 3 (Pre)                               | 1517960        | 1168                | 5661010        | 190267            | 28150        | 21422395        | 2663100        | 619782            |
| Repl. 4 (Post)                              | 1581233        | 569                 | 4857342        | 200953            | 27356        | 21157863        | 2674391        | 573751            |
| Repl. 5 (Post)                              | 1557374        | 1112                | 5139689        | 199307            | 29616        | 21293446        | 2635720        | 578502            |
| Repl. 6 (Post)                              | 1525857        | 1128                | 5143961        | 191724            | 27836        | 20874285        | 2542366        | 562201            |
| <b>Mean (All)</b>                           | <b>1627704</b> | <b>1067</b>         | <b>5416829</b> | <b>205798</b>     | <b>27933</b> | <b>21992685</b> | <b>2751876</b> | <b>605571</b>     |
| <b>SD (All)</b>                             | <b>137695</b>  | <b>250</b>          | <b>428860</b>  | <b>18520</b>      | <b>998</b>   | <b>1292755</b>  | <b>208770</b>  | <b>41579</b>      |
| <b>%RSD (All)</b>                           | <b>8.5</b>     | <b>23.4</b>         | <b>7.9</b>     | <b>9.0</b>        | <b>3.6</b>   | <b>5.9</b>      | <b>7.6</b>     | <b>6.9</b>        |
| <b>Mean (Pre)</b>                           | <b>1700586</b> | <b>1198</b>         | <b>5786660</b> | <b>214268</b>     | <b>27597</b> | <b>22876838</b> | <b>2886259</b> | <b>639658</b>     |
| <b>SD (Pre)</b>                             | <b>175193</b>  | <b>58</b>           | <b>149979</b>  | <b>24860</b>      | <b>858</b>   | <b>1336828</b>  | <b>224006</b>  | <b>27677</b>      |
| <b>%RSD (Pre)</b>                           | <b>10.3</b>    | <b>4.8</b>          | <b>2.6</b>     | <b>11.6</b>       | <b>3.1</b>   | <b>5.8</b>      | <b>7.8</b>     | <b>4.3</b>        |
| <b>Mean (Post)</b>                          | <b>1554821</b> | <b>936</b>          | <b>5046997</b> | <b>197328</b>     | <b>28269</b> | <b>21108531</b> | <b>2617492</b> | <b>571485</b>     |
| <b>SD (Post)</b>                            | <b>27776</b>   | <b>318</b>          | <b>164260</b>  | <b>4922</b>       | <b>1191</b>  | <b>213891</b>   | <b>67874</b>   | <b>8383</b>       |
| <b>%RSD (Post)</b>                          | <b>1.8</b>     | <b>34.0</b>         | <b>3.3</b>     | <b>2.5</b>        | <b>4.2</b>   | <b>1.0</b>      | <b>2.6</b>     | <b>1.5</b>        |
| <b>%Drift*</b>                              | <b>91.4</b>    | <b>78.2</b>         | <b>87.2</b>    | <b>92.1</b>       | <b>102.4</b> | <b>92.3</b>     | <b>90.7</b>    | <b>89.3</b>       |

\* Drift of post-run calibration replicates compared to pre-run calibration replicates.



## D. Accuracy

### D.1. Tablet

**Table S11a.** SIFT-MS accuracy data for Class 2A solvents (Run 1) in the tableted product. Values in red do not meet acceptance criteria ( $\pm 20\%$  of spiked value).

| Spike Level / % | Replicate Number and Statistical Parameters | Acetonitrile (H <sub>3</sub> O <sup>+</sup> 42) | Chlorobenzene (O <sub>2</sub> <sup>+</sup> 112) | Chlorobenzene (O <sub>2</sub> <sup>+</sup> 114) | Cumene (NO <sup>+</sup> 120) | Cyclohexane (NO <sup>+</sup> 83) | Cyclohexane (O <sub>2</sub> <sup>+</sup> 84) | 1,2-Dichloroethene (H <sub>3</sub> O <sup>+</sup> 99) | 1,2-Dichloroethene (O <sub>2</sub> <sup>+</sup> 96) | 1,2-Dichloroethene (O <sub>2</sub> <sup>+</sup> 98) | 1,4-Dioxane (H <sub>3</sub> O <sup>+</sup> 89) | 1,4-Dioxane (NO <sup>+</sup> 87) | 1,4-Dioxane (NO <sup>+</sup> 88) | Methanol (H <sub>3</sub> O <sup>+</sup> 33) | Methylcyclohexane (NO <sup>+</sup> 97) | Methylene chloride (O <sub>2</sub> <sup>+</sup> 84) | Methylene chloride (O <sub>2</sub> <sup>+</sup> 86) | Tetrahydrofuran (NO <sup>+</sup> 71) | Toluene (NO <sup>+</sup> 92) | Toluene (O <sub>2</sub> <sup>+</sup> 92) | Xylene (NO <sup>+</sup> 106) |
|-----------------|---------------------------------------------|-------------------------------------------------|-------------------------------------------------|-------------------------------------------------|------------------------------|----------------------------------|----------------------------------------------|-------------------------------------------------------|-----------------------------------------------------|-----------------------------------------------------|------------------------------------------------|----------------------------------|----------------------------------|---------------------------------------------|----------------------------------------|-----------------------------------------------------|-----------------------------------------------------|--------------------------------------|------------------------------|------------------------------------------|------------------------------|
| <b>50</b>       | Repl. 1                                     | 0.438                                           | 0.405                                           | 0.401                                           | 0.370                        | 0.348                            | 0.371                                        | 0.435                                                 | 0.441                                               | 0.396                                               | 0.449                                          | 0.393                            | 0.381                            | 0.449                                       | 0.297                                  | 0.357                                               | 0.412                                               | 0.415                                | 0.450                        | 0.407                                    | 0.403                        |
|                 | Repl. 2                                     | 0.446                                           | 0.408                                           | 0.410                                           | 0.382                        | 0.343                            | 0.363                                        | 0.384                                                 | 0.445                                               | 0.406                                               | 0.461                                          | 0.449                            | 0.403                            | 0.461                                       | 0.297                                  | 0.348                                               | 0.398                                               | 0.442                                | 0.468                        | 0.411                                    | 0.410                        |
|                 | Repl. 3                                     | 0.442                                           | 0.397                                           | 0.401                                           | 0.364                        | 0.330                            | 0.350                                        | 0.402                                                 | 0.427                                               | 0.389                                               | 0.400                                          | 0.405                            | 0.383                            | 0.437                                       | 0.280                                  | 0.337                                               | 0.396                                               | 0.426                                | 0.445                        | 0.385                                    | 0.399                        |
|                 | <b>Mean</b>                                 | <b>0.442</b>                                    | <b>0.403</b>                                    | <b>0.404</b>                                    | <b>0.372</b>                 | <b>0.340</b>                     | <b>0.362</b>                                 | <b>0.407</b>                                          | <b>0.438</b>                                        | <b>0.397</b>                                        | <b>0.437</b>                                   | <b>0.416</b>                     | <b>0.389</b>                     | <b>0.449</b>                                | <b>0.291</b>                           | <b>0.348</b>                                        | <b>0.402</b>                                        | <b>0.428</b>                         | <b>0.454</b>                 | <b>0.401</b>                             | <b>0.404</b>                 |
|                 | <b>SD</b>                                   | <b>0.003</b>                                    | <b>0.005</b>                                    | <b>0.004</b>                                    | <b>0.008</b>                 | <b>0.008</b>                     | <b>0.009</b>                                 | <b>0.021</b>                                          | <b>0.008</b>                                        | <b>0.007</b>                                        | <b>0.026</b>                                   | <b>0.024</b>                     | <b>0.010</b>                     | <b>0.010</b>                                | <b>0.008</b>                           | <b>0.008</b>                                        | <b>0.007</b>                                        | <b>0.011</b>                         | <b>0.009</b>                 | <b>0.011</b>                             | <b>0.004</b>                 |
|                 | <b>%RSD</b>                                 | <b>0.7</b>                                      | <b>1.2</b>                                      | <b>1.0</b>                                      | <b>2.0</b>                   | <b>2.2</b>                       | <b>2.4</b>                                   | <b>5.2</b>                                            | <b>1.8</b>                                          | <b>1.7</b>                                          | <b>6.1</b>                                     | <b>5.8</b>                       | <b>2.5</b>                       | <b>2.2</b>                                  | <b>2.7</b>                             | <b>2.4</b>                                          | <b>1.7</b>                                          | <b>2.6</b>                           | <b>2.1</b>                   | <b>2.8</b>                               | <b>1.1</b>                   |
| <b>100</b>      | Repl. 1                                     | 0.908                                           | 0.941                                           | 0.929                                           | 1.20                         | 0.848                            | 0.812                                        | 0.940                                                 | 0.958                                               | 0.910                                               | 0.922                                          | 0.865                            | 0.820                            | 0.882                                       | 0.765                                  | 0.806                                               | 0.883                                               | 0.882                                | 0.969                        | 0.928                                    | 1.058                        |
|                 | Repl. 2                                     | 0.912                                           | 0.907                                           | 0.891                                           | 0.856                        | 0.784                            | 0.783                                        | 0.908                                                 | 0.948                                               | 0.872                                               | 0.894                                          | 0.906                            | 0.855                            | 0.924                                       | 0.688                                  | 0.770                                               | 0.844                                               | 0.890                                | 0.938                        | 0.911                                    | 0.896                        |
|                 | Repl. 3                                     | 0.912                                           | 0.899                                           | 0.911                                           | 0.808                        | 0.773                            | 0.763                                        | 0.859                                                 | 0.948                                               | 0.855                                               | 0.928                                          | 0.815                            | 0.877                            | 0.879                                       | 0.664                                  | 0.745                                               | 0.852                                               | 0.897                                | 0.944                        | 0.911                                    | 0.879                        |
|                 | <b>Mean</b>                                 | <b>0.911</b>                                    | <b>0.916</b>                                    | <b>0.910</b>                                    | <b>0.956</b>                 | <b>0.802</b>                     | <b>0.786</b>                                 | <b>0.902</b>                                          | <b>0.951</b>                                        | <b>0.879</b>                                        | <b>0.915</b>                                   | <b>0.862</b>                     | <b>0.851</b>                     | <b>0.895</b>                                | <b>0.706</b>                           | <b>0.774</b>                                        | <b>0.860</b>                                        | <b>0.890</b>                         | <b>0.950</b>                 | <b>0.917</b>                             | <b>0.945</b>                 |
|                 | <b>SD</b>                                   | <b>0.002</b>                                    | <b>0.018</b>                                    | <b>0.015</b>                                    | <b>0.175</b>                 | <b>0.033</b>                     | <b>0.020</b>                                 | <b>0.034</b>                                          | <b>0.005</b>                                        | <b>0.023</b>                                        | <b>0.015</b>                                   | <b>0.037</b>                     | <b>0.024</b>                     | <b>0.021</b>                                | <b>0.043</b>                           | <b>0.025</b>                                        | <b>0.017</b>                                        | <b>0.006</b>                         | <b>0.014</b>                 | <b>0.008</b>                             | <b>0.081</b>                 |
|                 | <b>%RSD</b>                                 | <b>0.2</b>                                      | <b>2.0</b>                                      | <b>1.7</b>                                      | <b>18.4</b>                  | <b>4.14</b>                      | <b>2.6</b>                                   | <b>3.7</b>                                            | <b>0.5</b>                                          | <b>2.6</b>                                          | <b>1.6</b>                                     | <b>4.3</b>                       | <b>2.8</b>                       | <b>2.3</b>                                  | <b>6.1</b>                             | <b>3.3</b>                                          | <b>2.0</b>                                          | <b>0.7</b>                           | <b>1.4</b>                   | <b>0.9</b>                               | <b>8.6</b>                   |

**Table S11b.** SIFT-MS accuracy data for Class 2A solvents (Run 2) in the tableted product. Values in gray are probably outliers but are included in calculations.

| Spike Level / % | Replicate Number and Statistical Parameters | Acetonitrile (H <sub>3</sub> O <sup>+</sup> 42) | Chlorobenzene (O <sub>2</sub> <sup>+</sup> 112) | Chlorobenzene (O <sub>2</sub> <sup>+</sup> 114) | Cumene (NO <sup>+</sup> 120) | Cyclohexane (NO <sup>+</sup> 83) | Cyclohexane (O <sub>2</sub> <sup>+</sup> 84) | 1,2-Dichloroethene (H <sub>3</sub> O <sup>+</sup> 99) | 1,2-Dichloroethene (O <sub>2</sub> <sup>+</sup> 96) | 1,2-Dichloroethene (O <sub>2</sub> <sup>+</sup> 98) | 1,4-Dioxane (H <sub>3</sub> O <sup>+</sup> 89) | 1,4-Dioxane (NO <sup>+</sup> 87) | 1,4-Dioxane (NO <sup>+</sup> 88) | Methanol (H <sub>3</sub> O <sup>+</sup> 33) | Methylcyclohexane (NO <sup>+</sup> 97) | Methylene chloride (O <sub>2</sub> <sup>+</sup> 84) | Methylene chloride (O <sub>2</sub> <sup>+</sup> 86) | Tetrahydrofuran (NO <sup>+</sup> 71) | Toluene (NO <sup>+</sup> 92) | Toluene (O <sub>2</sub> <sup>+</sup> 92) | Xylene (NO <sup>+</sup> 106) |
|-----------------|---------------------------------------------|-------------------------------------------------|-------------------------------------------------|-------------------------------------------------|------------------------------|----------------------------------|----------------------------------------------|-------------------------------------------------------|-----------------------------------------------------|-----------------------------------------------------|------------------------------------------------|----------------------------------|----------------------------------|---------------------------------------------|----------------------------------------|-----------------------------------------------------|-----------------------------------------------------|--------------------------------------|------------------------------|------------------------------------------|------------------------------|
| <b>50</b>       | Repl. 1                                     | 0.525                                           | 0.463                                           | 0.471                                           | 0.437                        | 0.476                            | 0.500                                        | 0.526                                                 | 0.491                                               | 0.481                                               | 0.492                                          | 0.428                            | 0.480                            | 0.476                                       | 0.430                                  | 0.482                                               | 0.476                                               | 0.467                                | 0.504                        | 0.463                                    | 0.456                        |
|                 | Repl. 2                                     | 0.427                                           | 0.380                                           | 0.388                                           | 0.375                        | 0.348                            | 0.416                                        | 0.340                                                 | 0.408                                               | 0.404                                               | 0.412                                          | 0.484                            | 0.456                            | 0.434                                       | 0.384                                  | 0.397                                               | 0.389                                               | 0.408                                | 0.413                        | 0.376                                    | 0.380                        |
|                 | Repl. 3                                     | 0.582                                           | 0.499                                           | 0.507                                           | 0.462                        | 0.476                            | 0.505                                        | 0.537                                                 | 0.519                                               | 0.506                                               | 0.531                                          | 0.546                            | 0.534                            | 0.538                                       | 0.443                                  | 0.490                                               | 0.516                                               | 0.527                                | 0.530                        | 0.488                                    | 0.481                        |
|                 | <b>Mean</b>                                 | <b>0.511</b>                                    | <b>0.448</b>                                    | <b>0.455</b>                                    | <b>0.425</b>                 | <b>0.434</b>                     | <b>0.474</b>                                 | <b>0.468</b>                                          | <b>0.473</b>                                        | <b>0.464</b>                                        | <b>0.478</b>                                   | <b>0.486</b>                     | <b>0.490</b>                     | <b>0.483</b>                                | <b>0.419</b>                           | <b>0.456</b>                                        | <b>0.460</b>                                        | <b>0.467</b>                         | <b>0.482</b>                 | <b>0.443</b>                             | <b>0.439</b>                 |
|                 | <b>SD</b>                                   | <b>0.064</b>                                    | <b>0.050</b>                                    | <b>0.050</b>                                    | <b>0.037</b>                 | <b>0.061</b>                     | <b>0.041</b>                                 | <b>0.091</b>                                          | <b>0.047</b>                                        | <b>0.043</b>                                        | <b>0.050</b>                                   | <b>0.048</b>                     | <b>0.033</b>                     | <b>0.043</b>                                | <b>0.025</b>                           | <b>0.042</b>                                        | <b>0.053</b>                                        | <b>0.049</b>                         | <b>0.050</b>                 | <b>0.048</b>                             | <b>0.043</b>                 |
|                 | <b>%RSD</b>                                 | <b>12.5</b>                                     | <b>11.1</b>                                     | <b>10.9</b>                                     | <b>8.6</b>                   | <b>14.0</b>                      | <b>8.7</b>                                   | <b>19.3</b>                                           | <b>10.0</b>                                         | <b>9.3</b>                                          | <b>10.4</b>                                    | <b>9.9</b>                       | <b>6.7</b>                       | <b>8.9</b>                                  | <b>6.0</b>                             | <b>9.2</b>                                          | <b>11.5</b>                                         | <b>10.4</b>                          | <b>10.4</b>                  | <b>10.9</b>                              | <b>9.8</b>                   |
| <b>100</b>      | Repl. 1                                     | 0.868                                           | 0.957                                           | 0.953                                           | 1.059                        | 1.126                            | 1.095                                        | 0.947                                                 | 0.979                                               | 1.005                                               | 0.778                                          | 0.869                            | 0.874                            | 0.831                                       | 1.150                                  | 1.091                                               | 0.880                                               | 0.815                                | 1.001                        | 0.987                                    | 0.995                        |
|                 | Repl. 2                                     | 0.913                                           | 1.009                                           | 1.020                                           | 1.059                        | 1.134                            | 1.119                                        | 1.076                                                 | 1.034                                               | 1.060                                               | 0.919                                          | 0.966                            | 0.849                            | 0.909                                       | 1.141                                  | 1.116                                               | 0.945                                               | 0.874                                | 1.039                        | 1.042                                    | 1.033                        |
|                 | Repl. 3                                     | 0.894                                           | 0.984                                           | 0.998                                           | 1.008                        | 1.118                            | 1.095                                        | 1.074                                                 | 1.011                                               | 1.023                                               | 0.911                                          | 0.772                            | 0.849                            | 0.854                                       | 1.067                                  | 1.091                                               | 0.939                                               | 0.844                                | 1.027                        | 1.005                                    | 0.995                        |
|                 | <b>Mean</b>                                 | <b>0.892</b>                                    | <b>0.983</b>                                    | <b>0.990</b>                                    | <b>1.042</b>                 | <b>1.126</b>                     | <b>1.103</b>                                 | <b>1.032</b>                                          | <b>1.008</b>                                        | <b>1.030</b>                                        | <b>0.869</b>                                   | <b>0.869</b>                     | <b>0.857</b>                     | <b>0.865</b>                                | <b>1.120</b>                           | <b>1.100</b>                                        | <b>0.921</b>                                        | <b>0.844</b>                         | <b>1.022</b>                 | <b>1.011</b>                             | <b>1.008</b>                 |
|                 | <b>SD</b>                                   | <b>0.019</b>                                    | <b>0.021</b>                                    | <b>0.028</b>                                    | <b>0.024</b>                 | <b>0.007</b>                     | <b>0.011</b>                                 | <b>0.060</b>                                          | <b>0.023</b>                                        | <b>0.023</b>                                        | <b>0.065</b>                                   | <b>0.079</b>                     | <b>0.012</b>                     | <b>0.033</b>                                | <b>0.037</b>                           | <b>0.012</b>                                        | <b>0.029</b>                                        | <b>0.024</b>                         | <b>0.016</b>                 | <b>0.023</b>                             | <b>0.018</b>                 |
|                 | <b>%RSD</b>                                 | <b>2.1</b>                                      | <b>2.2</b>                                      | <b>2.8</b>                                      | <b>2.3</b>                   | <b>0.60</b>                      | <b>1.0</b>                                   | <b>5.8</b>                                            | <b>2.3</b>                                          | <b>2.2</b>                                          | <b>7.4</b>                                     | <b>9.1</b>                       | <b>1.4</b>                       | <b>3.8</b>                                  | <b>3.3</b>                             | <b>1.1</b>                                          | <b>3.2</b>                                          | <b>2.8</b>                           | <b>1.6</b>                   | <b>2.3</b>                               | <b>1.8</b>                   |

**Table S12a.** SIFT-MS accuracy data for Class 2B solvents (Run 1) in the tableted product. Values in red do not meet acceptance criteria ( $\pm 20\%$  of spiked value).

| Spike Level / % | Replicate Number and Statistical Parameters | Chloroform (O <sub>2</sub> <sup>+</sup> 83) | Chloroform (O <sub>2</sub> <sup>+</sup> 85) | 1,2-Dimethoxyethane (H <sub>3</sub> O <sup>+</sup> 91) | 1,2-Dimethoxyethane (NO <sup>+</sup> 89) | Hexane (NO <sup>+</sup> 85) | Methylbutylketone (NO <sup>+</sup> 130) | Nitromethane (H <sub>3</sub> O <sup>+</sup> 62) | Pyridine (H <sub>3</sub> O <sup>+</sup> 80) | Tetralin (NO <sup>+</sup> 132) | Tetralin (O <sub>2</sub> <sup>+</sup> 104) | Trichloroethylene (O <sub>2</sub> <sup>+</sup> 130) | Trichloroethylene (O <sub>2</sub> <sup>+</sup> 132) |
|-----------------|---------------------------------------------|---------------------------------------------|---------------------------------------------|--------------------------------------------------------|------------------------------------------|-----------------------------|-----------------------------------------|-------------------------------------------------|---------------------------------------------|--------------------------------|--------------------------------------------|-----------------------------------------------------|-----------------------------------------------------|
| <b>50</b>       | Repl. 1                                     | 0.312                                       | 0.389                                       | 0.378                                                  | 0.489                                    | 0.409                       | 0.453                                   | 0.557                                           | 0.339                                       | 0.380                          | 0.390                                      | 0.420                                               | 0.347                                               |
|                 | Repl. 2                                     | 0.304                                       | 0.379                                       | 0.407                                                  | 0.432                                    | 0.405                       | 0.453                                   | 0.519                                           | 0.406                                       | 0.389                          | 0.405                                      | 0.407                                               | 0.350                                               |
|                 | Repl. 3                                     | 0.291                                       | 0.375                                       | 0.391                                                  | 0.403                                    | 0.433                       | 0.443                                   | 0.465                                           | 0.423                                       | 0.384                          | 0.379                                      | 0.399                                               | 0.340                                               |
|                 | <b>Mean</b>                                 | <b>0.302</b>                                | <b>0.381</b>                                | <b>0.392</b>                                           | <b>0.441</b>                             | <b>0.416</b>                | <b>0.449</b>                            | <b>0.514</b>                                    | <b>0.389</b>                                | <b>0.384</b>                   | <b>0.391</b>                               | <b>0.408</b>                                        | <b>0.346</b>                                        |
|                 | <b>SD</b>                                   | <b>0.008</b>                                | <b>0.006</b>                                | <b>0.012</b>                                           | <b>0.036</b>                             | <b>0.012</b>                | <b>0.004</b>                            | <b>0.038</b>                                    | <b>0.036</b>                                | <b>0.004</b>                   | <b>0.011</b>                               | <b>0.009</b>                                        | <b>0.004</b>                                        |
|                 | <b>%RSD</b>                                 | <b>2.8</b>                                  | <b>1.6</b>                                  | <b>3.1</b>                                             | <b>8.2</b>                               | <b>3.0</b>                  | <b>1.0</b>                              | <b>7.3</b>                                      | <b>9.3</b>                                  | <b>1.0</b>                     | <b>2.7</b>                                 | <b>2.1</b>                                          | <b>1.2</b>                                          |
| <b>100</b>      | Repl. 1                                     | 0.787                                       | 0.853                                       | 0.900                                                  | 0.807                                    | 0.934                       | 0.862                                   | 0.996                                           | 0.838                                       | 0.850                          | 0.832                                      | 0.942                                               | 0.859                                               |
|                 | Repl. 2                                     | 0.729                                       | 0.808                                       | 0.881                                                  | 0.844                                    | 0.851                       | 0.855                                   | 0.955                                           | 0.954                                       | 0.806                          | 0.809                                      | 0.907                                               | 0.819                                               |
|                 | Repl. 3                                     | 0.693                                       | 0.820                                       | 0.859                                                  | 0.838                                    | 0.850                       | 0.862                                   | 0.908                                           | 0.941                                       | 0.833                          | 0.833                                      | 0.926                                               | 0.833                                               |
|                 | <b>Mean</b>                                 | <b>0.736</b>                                | <b>0.827</b>                                | <b>0.880</b>                                           | <b>0.830</b>                             | <b>0.879</b>                | <b>0.860</b>                            | <b>0.953</b>                                    | <b>0.911</b>                                | <b>0.830</b>                   | <b>0.825</b>                               | <b>0.925</b>                                        | <b>0.837</b>                                        |
|                 | <b>SD</b>                                   | <b>0.039</b>                                | <b>0.019</b>                                | <b>0.017</b>                                           | <b>0.016</b>                             | <b>0.039</b>                | <b>0.003</b>                            | <b>0.036</b>                                    | <b>0.052</b>                                | <b>0.018</b>                   | <b>0.011</b>                               | <b>0.014</b>                                        | <b>0.016</b>                                        |
|                 | <b>%RSD</b>                                 | <b>5.3</b>                                  | <b>2.3</b>                                  | <b>1.9</b>                                             | <b>2.0</b>                               | <b>4.5</b>                  | <b>0.4</b>                              | <b>3.80</b>                                     | <b>5.7</b>                                  | <b>2.2</b>                     | <b>1.3</b>                                 | <b>1.56</b>                                         | <b>2.0</b>                                          |

**Table S12b.** SIFT-MS accuracy data for Class 2B solvents (Run 2) in the tableted product. Values in gray are probably outliers but are included in calculations.

| Spike Level / % | Replicate Number and Statistical Parameters | Chloroform (O <sub>2</sub> <sup>+</sup> 83) | Chloroform (O <sub>2</sub> <sup>+</sup> 85) | 1,2-Dimethoxyethane (H <sub>3</sub> O <sup>+</sup> 91) | 1,2-Dimethoxyethane (NO <sup>+</sup> 89) | Hexane (NO <sup>+</sup> 85) | Methylbutylketone (NO <sup>+</sup> 130) | Nitromethane (H <sub>3</sub> O <sup>+</sup> 62) | Pyridine (H <sub>3</sub> O <sup>+</sup> 80) | Tetralin (NO <sup>+</sup> 132) | Tetralin (O <sub>2</sub> <sup>+</sup> 104) | Trichloroethylene (O <sub>2</sub> <sup>+</sup> 130) | Trichloroethylene (O <sub>2</sub> <sup>+</sup> 132) |
|-----------------|---------------------------------------------|---------------------------------------------|---------------------------------------------|--------------------------------------------------------|------------------------------------------|-----------------------------|-----------------------------------------|-------------------------------------------------|---------------------------------------------|--------------------------------|--------------------------------------------|-----------------------------------------------------|-----------------------------------------------------|
| <b>50</b>       | Repl. 1                                     | 0.437                                       | 0.466                                       | 0.436                                                  | 0.485                                    | 0.478                       | 0.493                                   | 0.505                                           | 0.391                                       | 0.460                          | 0.471                                      | 0.457                                               | 0.430                                               |
|                 | Repl. 2                                     | 0.337                                       | 0.374                                       | 0.364                                                  | 0.375                                    | 0.370                       | 0.411                                   | 0.388                                           | 0.367                                       | 0.368                          | 0.370                                      | 0.357                                               | 0.328                                               |
|                 | Repl. 3                                     | 0.447                                       | 0.514                                       | 0.495                                                  | 0.538                                    | 0.500                       | 0.552                                   | 0.580                                           | 0.461                                       | 0.506                          | 0.494                                      | 0.498                                               | 0.455                                               |
|                 | <b>Mean</b>                                 | <b>0.407</b>                                | <b>0.451</b>                                | <b>0.432</b>                                           | <b>0.466</b>                             | <b>0.449</b>                | <b>0.485</b>                            | <b>0.491</b>                                    | <b>0.406</b>                                | <b>0.445</b>                   | <b>0.445</b>                               | <b>0.438</b>                                        | <b>0.404</b>                                        |
|                 | <b>SD</b>                                   | <b>0.049</b>                                | <b>0.058</b>                                | <b>0.054</b>                                           | <b>0.068</b>                             | <b>0.057</b>                | <b>0.058</b>                            | <b>0.079</b>                                    | <b>0.040</b>                                | <b>0.057</b>                   | <b>0.054</b>                               | <b>0.059</b>                                        | <b>0.055</b>                                        |
|                 | <b>%RSD</b>                                 | <b>12.1</b>                                 | <b>12.8</b>                                 | <b>12.4</b>                                            | <b>14.5</b>                              | <b>12.7</b>                 | <b>12.0</b>                             | <b>16.1</b>                                     | <b>9.8</b>                                  | <b>12.9</b>                    | <b>12.1</b>                                | <b>13.5</b>                                         | <b>13.6</b>                                         |
| <b>100</b>      | Repl. 1                                     | 1.087                                       | 0.868                                       | 0.932                                                  | 0.830                                    | 0.868                       | 0.835                                   | 0.868                                           | 0.817                                       | 0.944                          | 0.922                                      | 1.075                                               | 0.972                                               |
|                 | Repl. 2                                     | 1.109                                       | 0.931                                       | 0.996                                                  | 0.901                                    | 0.952                       | 0.906                                   | 0.881                                           | 0.972                                       | 0.996                          | 0.980                                      | 1.066                                               | 1.024                                               |
|                 | Repl. 3                                     | 1.084                                       | 0.908                                       | 0.937                                                  | 0.898                                    | 0.963                       | 0.871                                   | 0.881                                           | 0.943                                       | 0.963                          | 0.964                                      | 1.066                                               | 1.015                                               |
|                 | <b>Mean</b>                                 | <b>1.093</b>                                | <b>0.903</b>                                | <b>0.955</b>                                           | <b>0.877</b>                             | <b>0.928</b>                | <b>0.871</b>                            | <b>0.876</b>                                    | <b>0.911</b>                                | <b>0.968</b>                   | <b>0.955</b>                               | <b>1.069</b>                                        | <b>1.004</b>                                        |
|                 | <b>SD</b>                                   | <b>0.011</b>                                | <b>0.026</b>                                | <b>0.029</b>                                           | <b>0.033</b>                             | <b>0.042</b>                | <b>0.029</b>                            | <b>0.006</b>                                    | <b>0.067</b>                                | <b>0.022</b>                   | <b>0.025</b>                               | <b>0.004</b>                                        | <b>0.023</b>                                        |
|                 | <b>%RSD</b>                                 | <b>1.0</b>                                  | <b>2.9</b>                                  | <b>3.0</b>                                             | <b>3.7</b>                               | <b>4.5</b>                  | <b>3.3</b>                              | <b>0.70</b>                                     | <b>7.4</b>                                  | <b>2.2</b>                     | <b>2.6</b>                                 | <b>0.38</b>                                         | <b>2.3</b>                                          |

**Table S13a.** GC-FID accuracy data for Class 2A solvents (Run 1) in the tableted product. Values in red do not meet accuracy ( $\pm 20\%$  of spiked value) or repeatability ( $< 20\%$  RSD) acceptance criteria.

| Spike Level / % | Replicate Number and Statistical Parameters | Acetonitrile | Chlorobenzene | Cumene       | Cyclohexane  | 1,2-Dichloroethene | 1,4-Dioxane  | Methanol     | Methylcyclohexane | Methylene chloride | Tetrahydrofuran | Toluene      | Xylene       |
|-----------------|---------------------------------------------|--------------|---------------|--------------|--------------|--------------------|--------------|--------------|-------------------|--------------------|-----------------|--------------|--------------|
| <b>50</b>       | Repl. 1                                     | 0.435        | 0.436         | 0.382        | 0.350        | 0.441              | 0.426        | 0.410        | 0.284             | 0.442              | 0.439           | 0.441        | 0.430        |
|                 | Repl. 2                                     | 0.336        | 0.437         | 0.386        | 0.347        | 0.430              | 0.486        | 0.458        | 0.294             | 0.440              | 0.443           | 0.442        | 0.431        |
|                 | Repl. 3                                     | 0.532        | 0.416         | 0.325        | 0.238        | 0.359              | 0.503        | 0.532        | 0.186             | 0.426              | 0.404           | 0.395        | 0.391        |
|                 | <b>Mean</b>                                 | <b>0.434</b> | <b>0.430</b>  | <b>0.364</b> | <b>0.311</b> | <b>0.410</b>       | <b>0.472</b> | <b>0.467</b> | <b>0.254</b>      | <b>0.436</b>       | <b>0.429</b>    | <b>0.426</b> | <b>0.417</b> |
|                 | <b>SD</b>                                   | <b>0.098</b> | <b>0.012</b>  | <b>0.034</b> | <b>0.064</b> | <b>0.045</b>       | <b>0.041</b> | <b>0.062</b> | <b>0.060</b>      | <b>0.009</b>       | <b>0.022</b>    | <b>0.027</b> | <b>0.023</b> |
|                 | <b>%RSD</b>                                 | <b>22.5</b>  | <b>2.8</b>    | <b>9.4</b>   | <b>20.5</b>  | <b>10.9</b>        | <b>8.6</b>   | <b>13.2</b>  | <b>23.5</b>       | <b>2.0</b>         | <b>5.1</b>      | <b>6.3</b>   | <b>5.5</b>   |
| <b>100</b>      | Repl. 1                                     | 1.24         | 0.938         | 0.830        | 0.826        | 0.948              | 0.961        | 0.976        | 0.725             | 0.973              | 0.968           | 0.948        | 0.915        |
|                 | Repl. 2                                     | 1.17         | 0.905         | 0.747        | 0.726        | 0.892              | 0.901        | 0.911        | 0.592             | 0.903              | 0.920           | 0.905        | 0.864        |
|                 | Repl. 3                                     | 1.06         | 0.939         | 0.878        | 0.863        | 0.933              | 0.968        | 0.966        | 0.806             | 0.958              | 0.949           | 0.945        | 0.924        |
|                 | <b>Mean</b>                                 | <b>1.16</b>  | <b>0.927</b>  | <b>0.818</b> | <b>0.805</b> | <b>0.925</b>       | <b>0.943</b> | <b>0.951</b> | <b>0.707</b>      | <b>0.944</b>       | <b>0.946</b>    | <b>0.932</b> | <b>0.901</b> |
|                 | <b>SD</b>                                   | <b>0.091</b> | <b>0.020</b>  | <b>0.066</b> | <b>0.071</b> | <b>0.029</b>       | <b>0.037</b> | <b>0.035</b> | <b>0.108</b>      | <b>0.037</b>       | <b>0.024</b>    | <b>0.024</b> | <b>0.033</b> |
|                 | <b>%RSD</b>                                 | <b>7.8</b>   | <b>2.1</b>    | <b>8.1</b>   | <b>8.8</b>   | <b>3.1</b>         | <b>3.9</b>   | <b>3.6</b>   | <b>15.3</b>       | <b>3.9</b>         | <b>2.5</b>      | <b>2.6</b>   | <b>3.6</b>   |

**Table S13b.** GC-FID accuracy data for Class 2A solvents (Run 2) in the tableted product. Values in red do not meet acceptance criteria ( $\pm 20\%$  of spiked value), while values in gray are outliers and not included in calculations.

| Spike Level / % | Replicate Number and Statistical Parameters | Acetonitrile | Chlorobenzene | Cumene       | Cyclohexane  | 1,2-Dichloroethene | 1,4-Dioxane  | Methanol     | Methylcyclohexane | Methylene chloride | Tetrahydrofuran | Toluene      | Xylene       |
|-----------------|---------------------------------------------|--------------|---------------|--------------|--------------|--------------------|--------------|--------------|-------------------|--------------------|-----------------|--------------|--------------|
| <b>50</b>       | Repl. 1                                     | 0.485        | 0.476         | 0.389        | 0.400        | 0.493              | 0.438        | 0.457        | 0.317             | 0.495              | 0.489           | 0.483        | 0.452        |
|                 | Repl. 2                                     | 0.542        | 0.493         | 0.471        | 0.420        | 0.469              | 0.463        | 0.450        | 0.402             | 0.505              | 0.490           | 0.485        | 0.485        |
|                 | Repl. 3                                     | 0.529        | 0.479         | 0.474        | 0.454        | 0.471              | 0.496        | 0.550        | 0.443             | 0.487              | 0.477           | 0.481        | 0.485        |
|                 | <b>Mean</b>                                 | <b>0.519</b> | <b>0.483</b>  | <b>0.445</b> | <b>0.424</b> | <b>0.478</b>       | <b>0.466</b> | <b>0.486</b> | <b>0.387</b>      | <b>0.496</b>       | <b>0.485</b>    | <b>0.483</b> | <b>0.474</b> |
|                 | <b>SD</b>                                   | <b>0.024</b> | <b>0.009</b>  | <b>0.040</b> | <b>0.022</b> | <b>0.011</b>       | <b>0.024</b> | <b>0.046</b> | <b>0.053</b>      | <b>0.007</b>       | <b>0.006</b>    | <b>0.002</b> | <b>0.019</b> |
|                 | <b>%RSD</b>                                 | <b>4.7</b>   | <b>1.9</b>    | <b>8.9</b>   | <b>5.3</b>   | <b>2.2</b>         | <b>5.1</b>   | <b>9.5</b>   | <b>13.6</b>       | <b>1.5</b>         | <b>1.2</b>      | <b>0.32</b>  | <b>4.0</b>   |
| <b>100</b>      | Repl. 1                                     | 0.785        | 0.947         | 0.945        | 1.004        | 1.017              | 0.735        | 0.740        | 0.963             | 0.932              | 0.969           | 0.989        | 0.962        |
|                 | Repl. 2                                     | 0.813        | 0.978         | 0.986        | 1.046        | 1.035              | 0.704        | 0.749        | 1.016             | 0.955              | 0.981           | 1.013        | 0.996        |
|                 | Repl. 3                                     | 0.478        | 0.631         | 0.704        | 0.679        | 0.618              | 0.399        | 1.958        | 0.678             | 0.429              | 0.704           | 0.647        | 0.658        |
|                 | <b>Mean</b>                                 | <b>0.799</b> | <b>0.963</b>  | <b>0.966</b> | <b>1.025</b> | <b>1.026</b>       | <b>0.719</b> | <b>0.744</b> | <b>0.989</b>      | <b>0.944</b>       | <b>0.975</b>    | <b>1.001</b> | <b>0.979</b> |
|                 | <b>SD</b>                                   | <b>0.014</b> | <b>0.015</b>  | <b>0.020</b> | <b>0.021</b> | <b>0.009</b>       | <b>0.015</b> | <b>0.005</b> | <b>0.027</b>      | <b>0.012</b>       | <b>0.006</b>    | <b>0.012</b> | <b>0.017</b> |
|                 | <b>%RSD</b>                                 | <b>1.7</b>   | <b>1.6</b>    | <b>2.1</b>   | <b>2.1</b>   | <b>0.88</b>        | <b>2.1</b>   | <b>0.61</b>  | <b>2.7</b>        | <b>1.2</b>         | <b>0.64</b>     | <b>1.2</b>   | <b>1.7</b>   |

**Table S14a.** GC-FID accuracy data for Class 2B solvents (Run 1) in the tableted product. Values in red do not meet accuracy ( $\pm 20\%$  of spiked value) or repeatability ( $< 20\%$  RSD) acceptance criteria.

| Spike Level / % | Replicate Number and Statistical Parameters | Chloroform   | 1,2-Dimethoxyethane | Hexane       | Methylbutylketone | Nitromethane | Pyridine     | Tetralin     | Trichloroethylene |
|-----------------|---------------------------------------------|--------------|---------------------|--------------|-------------------|--------------|--------------|--------------|-------------------|
| <b>50</b>       | Repl. 1                                     | 0.452        | 0.298               | 0.421        | 0.427             | 0.421        | 0.370        | 0.455        | 0.470             |
|                 | Repl. 2                                     | 0.462        | 0.240               | 0.397        | 0.435             | 0.358        | 0.421        | 0.454        | 0.442             |
|                 | Repl. 3                                     | 0.507        | 0.113               | 0.297        | 0.470             | 0.252        | 0.476        | 0.450        | 0.393             |
|                 | <b>Mean</b>                                 | <b>0.474</b> | <b>0.217</b>        | <b>0.372</b> | <b>0.444</b>      | <b>0.344</b> | <b>0.422</b> | <b>0.453</b> | <b>0.435</b>      |
|                 | <b>SD</b>                                   | <b>0.029</b> | <b>0.095</b>        | <b>0.066</b> | <b>0.023</b>      | <b>0.085</b> | <b>0.053</b> | <b>0.003</b> | <b>0.039</b>      |
|                 | <b>%RSD</b>                                 | <b>6.2</b>   | <b>43.8</b>         | <b>17.7</b>  | <b>5.2</b>        | <b>24.8</b>  | <b>12.5</b>  | <b>0.6</b>   | <b>9.0</b>        |
| <b>100</b>      | Repl. 1                                     | 1.06         | 0.348               | 0.958        | 0.960             | 0.896        | 0.954        | 1.01         | 1.10              |
|                 | Repl. 2                                     | 1.00         | 0.247               | 0.844        | 0.936             | 0.769        | 0.857        | 0.947        | 1.00              |
|                 | Repl. 3                                     | 1.06         | 0.264               | 0.888        | 0.955             | 0.830        | 0.948        | 0.971        | 1.03              |
|                 | <b>Mean</b>                                 | <b>1.04</b>  | <b>0.286</b>        | <b>0.897</b> | <b>0.950</b>      | <b>0.832</b> | <b>0.920</b> | <b>0.976</b> | <b>1.05</b>       |
|                 | <b>SD</b>                                   | <b>0.035</b> | <b>0.054</b>        | <b>0.058</b> | <b>0.012</b>      | <b>0.064</b> | <b>0.054</b> | <b>0.032</b> | <b>0.052</b>      |
|                 | <b>%RSD</b>                                 | <b>3.3</b>   | <b>18.9</b>         | <b>6.4</b>   | <b>1.3</b>        | <b>7.6</b>   | <b>5.9</b>   | <b>3.3</b>   | <b>5.0</b>        |

**Table S14b.** GC-FID accuracy data for Class 2B solvents (Run 2) in the tableted product. Values in red do not meet acceptance criteria ( $\pm 20\%$  of spiked value), while values in gray are outliers and are not included in calculations.

| Spike Level / % | Replicate Number and Statistical Parameters | Chloroform   | 1,2-Dimethoxyethane | Hexane       | Methylbutylketone | Nitromethane | Pyridine     | Tetralin     | Trichloroethylene |
|-----------------|---------------------------------------------|--------------|---------------------|--------------|-------------------|--------------|--------------|--------------|-------------------|
| <b>50</b>       | Repl. 1                                     | 0.479        | 0.782               | 0.483        | 0.475             | 0.486        | 0.596        | 0.493        | 0.454             |
|                 | Repl. 2                                     | 0.541        | 0.684               | 0.432        | 0.530             | 0.448        | 0.666        | 0.519        | 0.459             |
|                 | Repl. 3                                     | 0.500        | 0.704               | 0.447        | 0.469             | 0.407        | 0.610        | 0.479        | 0.466             |
|                 | <b>Mean</b>                                 | <b>0.507</b> | <b>0.723</b>        | <b>0.454</b> | <b>0.491</b>      | <b>0.447</b> | <b>0.624</b> | <b>0.497</b> | <b>0.460</b>      |
|                 | <b>SD</b>                                   | <b>0.026</b> | <b>0.042</b>        | <b>0.021</b> | <b>0.027</b>      | <b>0.032</b> | <b>0.030</b> | <b>0.016</b> | <b>0.005</b>      |
|                 | <b>%RSD</b>                                 | <b>5.1</b>   | <b>5.8</b>          | <b>4.6</b>   | <b>5.5</b>        | <b>7.2</b>   | <b>4.8</b>   | <b>3.3</b>   | <b>1.1</b>        |
| <b>100</b>      | Repl. 1                                     | 0.795        | 0.798               | 1.082        | 0.828             | 1.011        | 1.026        | 0.924        | 1.017             |
|                 | Repl. 2                                     | 0.843        | 0.873               | 1.076        | 0.859             | 1.049        | 1.065        | 0.940        | 1.018             |
|                 | Repl. 3                                     | 0.519        | 0.797               | 0.706        | 0.526             | 0.697        | 0.679        | 0.612        | 0.659             |
|                 | <b>Mean</b>                                 | <b>0.819</b> | <b>0.836</b>        | <b>1.079</b> | <b>0.844</b>      | <b>1.030</b> | <b>1.046</b> | <b>0.932</b> | <b>1.017</b>      |
|                 | <b>SD</b>                                   | <b>0.024</b> | <b>0.038</b>        | <b>0.003</b> | <b>0.016</b>      | <b>0.019</b> | <b>0.020</b> | <b>0.008</b> | <b>0.0004</b>     |
|                 | <b>%RSD</b>                                 | <b>2.9</b>   | <b>4.5</b>          | <b>0.29</b>  | <b>1.9</b>        | <b>1.8</b>   | <b>1.9</b>   | <b>0.83</b>  | <b>0.04</b>       |



## D.2. Oral suspension

**Table S15a.** SIFT-MS accuracy data for Class 2A solvents (Run 1) in the oral suspension product. Values in red do not meet acceptance criteria ( $\pm 20\%$  of spiked value), while values in gray are probably outliers but are included in calculations.

| Spike Level / % | Replicate Number and Statistical Parameters | Acetonitrile (H <sub>3</sub> O <sup>+</sup> 42) | Chlorobenzene (O <sub>2</sub> <sup>+</sup> 112) | Chlorobenzene (O <sub>2</sub> <sup>+</sup> 114) | Cumene (NO <sup>+</sup> 120) | Cyclohexane (NO <sup>+</sup> 83) | Cyclohexane (O <sub>2</sub> <sup>+</sup> 84) | 1,2-Dichloroethene (H <sub>3</sub> O <sup>+</sup> 99) | 1,2-Dichloroethene (O <sub>2</sub> <sup>+</sup> 96) | 1,2-Dichloroethene (O <sub>2</sub> <sup>+</sup> 98) | 1,4-Dioxane (H <sub>3</sub> O <sup>+</sup> 89) | 1,4-Dioxane (NO <sup>+</sup> 87) | 1,4-Dioxane (NO <sup>+</sup> 88) | Methanol (H <sub>3</sub> O <sup>+</sup> 33) | Methylcyclohexane (NO <sup>+</sup> 97) | Methylene chloride (O <sub>2</sub> <sup>+</sup> 84) | Methylene chloride (O <sub>2</sub> <sup>+</sup> 86) | Tetrahydrofuran (NO <sup>+</sup> 71) | Toluene (NO <sup>+</sup> 92) | Toluene (O <sub>2</sub> <sup>+</sup> 92) | Xylene (NO <sup>+</sup> 106) |
|-----------------|---------------------------------------------|-------------------------------------------------|-------------------------------------------------|-------------------------------------------------|------------------------------|----------------------------------|----------------------------------------------|-------------------------------------------------------|-----------------------------------------------------|-----------------------------------------------------|------------------------------------------------|----------------------------------|----------------------------------|---------------------------------------------|----------------------------------------|-----------------------------------------------------|-----------------------------------------------------|--------------------------------------|------------------------------|------------------------------------------|------------------------------|
| <b>50</b>       | Repl. 1                                     | 0.466                                           | 0.374                                           | 0.375                                           | 0.355                        | 0.332                            | 0.345                                        | 0.366                                                 | 0.416                                               | 0.377                                               | 6.846                                          | 0.552                            | 0.751                            | 0.457                                       | 0.288                                  | 0.330                                               | 0.439                                               | 0.649                                | 0.434                        | 0.377                                    | 0.382                        |
|                 | Repl. 2                                     | 0.563                                           | 0.444                                           | 0.436                                           | 0.386                        | 0.354                            | 0.363                                        | 0.419                                                 | 0.463                                               | 0.418                                               | 9.258                                          | 0.710                            | 1.068                            | 0.571                                       | 0.297                                  | 0.348                                               | 0.505                                               | 0.806                                | 0.482                        | 0.428                                    | 0.425                        |
|                 | Repl. 3                                     | 0.368                                           | 0.327                                           | 0.325                                           | 0.288                        | 0.283                            | 0.307                                        | 0.339                                                 | 0.369                                               | 0.339                                               | 6.115                                          | 0.500                            | 0.674                            | 0.375                                       | 0.237                                  | 0.291                                               | 0.379                                               | 0.545                                | 0.362                        | 0.324                                    | 0.321                        |
|                 | <b>Mean</b>                                 | <b>0.466</b>                                    | <b>0.382</b>                                    | <b>0.379</b>                                    | <b>0.343</b>                 | <b>0.323</b>                     | <b>0.338</b>                                 | <b>0.375</b>                                          | <b>0.416</b>                                        | <b>0.378</b>                                        | <b>7.406</b>                                   | <b>0.587</b>                     | <b>0.831</b>                     | <b>0.468</b>                                | <b>0.274</b>                           | <b>0.323</b>                                        | <b>0.441</b>                                        | <b>0.667</b>                         | <b>0.426</b>                 | <b>0.376</b>                             | <b>0.376</b>                 |
|                 | <b>SD</b>                                   | <b>0.079</b>                                    | <b>0.048</b>                                    | <b>0.045</b>                                    | <b>0.041</b>                 | <b>0.030</b>                     | <b>0.024</b>                                 | <b>0.034</b>                                          | <b>0.038</b>                                        | <b>0.032</b>                                        | <b>1.343</b>                                   | <b>0.090</b>                     | <b>0.171</b>                     | <b>0.080</b>                                | <b>0.026</b>                           | <b>0.024</b>                                        | <b>0.051</b>                                        | <b>0.107</b>                         | <b>0.049</b>                 | <b>0.042</b>                             | <b>0.043</b>                 |
|                 | <b>%RSD</b>                                 | <b>17.0</b>                                     | <b>12.5</b>                                     | <b>12.0</b>                                     | <b>11.9</b>                  | <b>9.2</b>                       | <b>7.0</b>                                   | <b>9.0</b>                                            | <b>9.2</b>                                          | <b>8.6</b>                                          | <b>18.1</b>                                    | <b>15.2</b>                      | <b>20.6</b>                      | <b>17.2</b>                                 | <b>9.6</b>                             | <b>7.3</b>                                          | <b>11.6</b>                                         | <b>16.1</b>                          | <b>11.5</b>                  | <b>11.2</b>                              | <b>11.4</b>                  |
| <b>100</b>      | Repl. 1                                     | 1.056                                           | 0.916                                           | 0.908                                           | 0.819                        | 0.784                            | 0.781                                        | 0.842                                                 | 0.976                                               | 0.906                                               | 9.020                                          | 1.208                            | 1.434                            | 1.070                                       | 0.675                                  | 0.768                                               | 0.939                                               | 1.255                                | 0.950                        | 0.923                                    | 0.905                        |
|                 | Repl. 2                                     | 1.021                                           | 0.899                                           | 0.908                                           | 0.824                        | 0.791                            | 0.778                                        | 0.850                                                 | 0.969                                               | 0.889                                               | 8.425                                          | 1.249                            | 1.349                            | 1.048                                       | 0.689                                  | 0.765                                               | 0.930                                               | 1.217                                | 0.976                        | 0.934                                    | 0.889                        |
|                 | Repl. 3                                     | 0.986                                           | 0.882                                           | 0.864                                           | 0.824                        | 0.791                            | 0.786                                        | 0.883                                                 | 0.951                                               | 0.877                                               | 8.544                                          | 1.169                            | 1.434                            | 1.018                                       | 0.712                                  | 0.774                                               | 0.914                                               | 1.164                                | 0.938                        | 0.923                                    | 0.883                        |
|                 | <b>Mean</b>                                 | <b>1.021</b>                                    | <b>0.899</b>                                    | <b>0.894</b>                                    | <b>0.823</b>                 | <b>0.788</b>                     | <b>0.782</b>                                 | <b>0.859</b>                                          | <b>0.966</b>                                        | <b>0.890</b>                                        | <b>8.663</b>                                   | <b>1.208</b>                     | <b>1.406</b>                     | <b>1.045</b>                                | <b>0.692</b>                           | <b>0.769</b>                                        | <b>0.928</b>                                        | <b>1.212</b>                         | <b>0.955</b>                 | <b>0.926</b>                             | <b>0.892</b>                 |
|                 | <b>SD</b>                                   | <b>0.029</b>                                    | <b>0.014</b>                                    | <b>0.021</b>                                    | <b>0.003</b>                 | <b>0.003</b>                     | <b>0.003</b>                                 | <b>0.018</b>                                          | <b>0.011</b>                                        | <b>0.012</b>                                        | <b>0.257</b>                                   | <b>0.033</b>                     | <b>0.040</b>                     | <b>0.021</b>                                | <b>0.015</b>                           | <b>0.004</b>                                        | <b>0.010</b>                                        | <b>0.037</b>                         | <b>0.016</b>                 | <b>0.005</b>                             | <b>0.009</b>                 |
|                 | <b>%RSD</b>                                 | <b>2.8</b>                                      | <b>1.5</b>                                      | <b>2.3</b>                                      | <b>0.3</b>                   | <b>0.40</b>                      | <b>0.4</b>                                   | <b>2.1</b>                                            | <b>1.1</b>                                          | <b>1.3</b>                                          | <b>3.0</b>                                     | <b>2.7</b>                       | <b>2.9</b>                       | <b>2.0</b>                                  | <b>2.2</b>                             | <b>0.5</b>                                          | <b>1.1</b>                                          | <b>3.1</b>                           | <b>1.7</b>                   | <b>0.6</b>                               | <b>1.0</b>                   |

**Table S15b.** SIFT-MS accuracy data for Class 2A solvents (Run 2) in the oral suspension product. Values in red do not meet acceptance criteria ( $\pm 20\%$  of spiked value).

| Spike Level / % | Replicate Number and Statistical Parameters | Acetonitrile (H <sub>3</sub> O <sup>+</sup> 42) | Chlorobenzene (O <sub>2</sub> <sup>+</sup> 112) | Chlorobenzene (O <sub>2</sub> <sup>+</sup> 114) | Cumene (NO <sup>+</sup> 120) | Cyclohexane (NO <sup>+</sup> 83) | Cyclohexane (O <sub>2</sub> <sup>+</sup> 84) | 1,2-Dichloroethene (H <sub>3</sub> O <sup>+</sup> 99) | 1,2-Dichloroethene (O <sub>2</sub> <sup>+</sup> 96) | 1,2-Dichloroethene (O <sub>2</sub> <sup>+</sup> 98) | 1,4-Dioxane (H <sub>3</sub> O <sup>+</sup> 89) | 1,4-Dioxane (NO <sup>+</sup> 87) | 1,4-Dioxane (NO <sup>+</sup> 88) | Methanol (H <sub>3</sub> O <sup>+</sup> 33) | Methylcyclohexane (NO <sup>+</sup> 97) | Methylene chloride (O <sub>2</sub> <sup>+</sup> 84) | Methylene chloride (O <sub>2</sub> <sup>+</sup> 86) | Tetrahydrofuran (NO <sup>+</sup> 71) | Toluene (NO <sup>+</sup> 92) | Toluene (O <sub>2</sub> <sup>+</sup> 92) | Xylene (NO <sup>+</sup> 106) |
|-----------------|---------------------------------------------|-------------------------------------------------|-------------------------------------------------|-------------------------------------------------|------------------------------|----------------------------------|----------------------------------------------|-------------------------------------------------------|-----------------------------------------------------|-----------------------------------------------------|------------------------------------------------|----------------------------------|----------------------------------|---------------------------------------------|----------------------------------------|-----------------------------------------------------|-----------------------------------------------------|--------------------------------------|------------------------------|------------------------------------------|------------------------------|
| <b>50</b>       | Repl. 1                                     | 0.536                                           | 0.478                                           | 0.487                                           | 0.474                        | 0.485                            | 0.505                                        | 0.567                                                 | 0.499                                               | 0.493                                               | 1.049                                          | 0.538                            | 0.497                            | 0.501                                       | 0.463                                  | 0.490                                               | 0.501                                               | 0.515                                | 0.497                        | 0.465                                    | 0.474                        |
|                 | Repl. 2                                     | 0.536                                           | 0.460                                           | 0.468                                           | 0.450                        | 0.472                            | 0.491                                        | 0.547                                                 | 0.495                                               | 0.484                                               | 0.972                                          | 0.475                            | 0.528                            | 0.505                                       | 0.438                                  | 0.478                                               | 0.485                                               | 0.487                                | 0.499                        | 0.464                                    | 0.450                        |
|                 | Repl. 3                                     | 0.533                                           | 0.454                                           | 0.474                                           | 0.438                        | 0.485                            | 0.477                                        | 0.578                                                 | 0.479                                               | 0.475                                               | 0.985                                          | 0.510                            | 0.523                            | 0.481                                       | 0.424                                  | 0.466                                               | 0.479                                               | 0.482                                | 0.483                        | 0.449                                    | 0.443                        |
|                 | <b>Mean</b>                                 | <b>0.535</b>                                    | <b>0.464</b>                                    | <b>0.477</b>                                    | <b>0.454</b>                 | <b>0.481</b>                     | <b>0.491</b>                                 | <b>0.564</b>                                          | <b>0.491</b>                                        | <b>0.484</b>                                        | <b>1.002</b>                                   | <b>0.508</b>                     | <b>0.516</b>                     | <b>0.496</b>                                | <b>0.442</b>                           | <b>0.478</b>                                        | <b>0.489</b>                                        | <b>0.495</b>                         | <b>0.493</b>                 | <b>0.459</b>                             | <b>0.456</b>                 |
|                 | <b>SD</b>                                   | <b>0.002</b>                                    | <b>0.010</b>                                    | <b>0.008</b>                                    | <b>0.015</b>                 | <b>0.006</b>                     | <b>0.012</b>                                 | <b>0.013</b>                                          | <b>0.009</b>                                        | <b>0.008</b>                                        | <b>0.034</b>                                   | <b>0.026</b>                     | <b>0.014</b>                     | <b>0.010</b>                                | <b>0.016</b>                           | <b>0.010</b>                                        | <b>0.009</b>                                        | <b>0.014</b>                         | <b>0.007</b>                 | <b>0.008</b>                             | <b>0.013</b>                 |
|                 | <b>%RSD</b>                                 | <b>0.33</b>                                     | <b>2.2</b>                                      | <b>1.7</b>                                      | <b>3.2</b>                   | <b>1.2</b>                       | <b>2.4</b>                                   | <b>2.2</b>                                            | <b>1.7</b>                                          | <b>1.6</b>                                          | <b>3.4</b>                                     | <b>5.1</b>                       | <b>2.6</b>                       | <b>2.1</b>                                  | <b>3.7</b>                             | <b>2.1</b>                                          | <b>1.9</b>                                          | <b>2.9</b>                           | <b>1.4</b>                   | <b>1.7</b>                               | <b>2.9</b>                   |
| <b>100</b>      | Repl. 1                                     | 1.015                                           | 1.067                                           | 1.069                                           | 1.078                        | 1.101                            | 1.109                                        | 1.116                                                 | 1.070                                               | 1.088                                               | 1.471                                          | 0.987                            | 0.952                            | 0.964                                       | 1.107                                  | 1.112                                               | 1.041                                               | 1.005                                | 1.065                        | 1.086                                    | 1.062                        |
|                 | Repl. 2                                     | 0.883                                           | 0.984                                           | 0.975                                           | 1.034                        | 1.126                            | 1.114                                        | 1.149                                                 | 1.003                                               | 1.023                                               | 1.261                                          | 0.867                            | 0.833                            | 0.811                                       | 1.122                                  | 1.112                                               | 0.918                                               | 0.852                                | 1.014                        | 1.011                                    | 1.002                        |
|                 | Repl. 3                                     | 0.932                                           | 0.999                                           | 1.020                                           | 1.027                        | 1.138                            | 1.095                                        | 1.138                                                 | 1.022                                               | 1.036                                               | 1.351                                          | 0.973                            | 0.890                            | 0.872                                       | 1.110                                  | 1.091                                               | 0.971                                               | 0.910                                | 1.020                        | 1.024                                    | 1.024                        |
|                 | <b>Mean</b>                                 | <b>0.943</b>                                    | <b>1.017</b>                                    | <b>1.021</b>                                    | <b>1.046</b>                 | <b>1.122</b>                     | <b>1.106</b>                                 | <b>1.134</b>                                          | <b>1.032</b>                                        | <b>1.049</b>                                        | <b>1.361</b>                                   | <b>0.943</b>                     | <b>0.892</b>                     | <b>0.883</b>                                | <b>1.113</b>                           | <b>1.105</b>                                        | <b>0.977</b>                                        | <b>0.922</b>                         | <b>1.033</b>                 | <b>1.040</b>                             | <b>1.030</b>                 |
|                 | <b>SD</b>                                   | <b>0.054</b>                                    | <b>0.036</b>                                    | <b>0.038</b>                                    | <b>0.022</b>                 | <b>0.015</b>                     | <b>0.008</b>                                 | <b>0.014</b>                                          | <b>0.028</b>                                        | <b>0.028</b>                                        | <b>0.086</b>                                   | <b>0.053</b>                     | <b>0.049</b>                     | <b>0.063</b>                                | <b>0.006</b>                           | <b>0.010</b>                                        | <b>0.051</b>                                        | <b>0.063</b>                         | <b>0.023</b>                 | <b>0.033</b>                             | <b>0.025</b>                 |
|                 | <b>%RSD</b>                                 | <b>5.8</b>                                      | <b>3.5</b>                                      | <b>3.7</b>                                      | <b>2.1</b>                   | <b>1.4</b>                       | <b>0.73</b>                                  | <b>1.2</b>                                            | <b>2.7</b>                                          | <b>2.7</b>                                          | <b>6.3</b>                                     | <b>5.7</b>                       | <b>5.4</b>                       | <b>7.1</b>                                  | <b>0.55</b>                            | <b>0.87</b>                                         | <b>5.2</b>                                          | <b>6.8</b>                           | <b>2.2</b>                   | <b>3.1</b>                               | <b>2.4</b>                   |

\* %Acc. is the accuracy (as percentage) with respect to the spiked concentration.

**Table S16a.** SIFT-MS accuracy data for Class 2B solvents (Run 1) in the oral suspension product. Values in red do not meet acceptance criteria ( $\pm 20\%$  of spiked value).

| Spike Level / % | Replicate Number and Statistical Parameters | Chloroform ( $O_2^{+*}$ 83) | Chloroform ( $O_2^{+*}$ 85) | 1,2-Dimethoxyethane ( $H_3O^{+}$ 91) | 1,2-Dimethoxyethane ( $NO^{+}$ 89) | Hexane ( $NO^{+}$ 85) | Methylbutylketone ( $NO^{+}$ 130) | Nitromethane ( $H_3O^{+}$ 62) | Pyridine ( $H_3O^{+}$ 80) | Tetralin ( $NO^{+}$ 132) | Tetralin ( $O_2^{+*}$ 104) | Trichloroethylene ( $O_2^{+*}$ 130) | Trichloroethylene ( $O_2^{+*}$ 132) |
|-----------------|---------------------------------------------|-----------------------------|-----------------------------|--------------------------------------|------------------------------------|-----------------------|-----------------------------------|-------------------------------|---------------------------|--------------------------|----------------------------|-------------------------------------|-------------------------------------|
| <b>50</b>       | Repl. 1                                     | 0.284                       | 0.451                       | 0.404                                | 0.807                              | 9.183                 | 0.468                             | 0.506                         | 0.322                     | 0.349                    | 0.360                      | 0.482                               | 0.311                               |
|                 | Repl. 2                                     | 0.303                       | 0.514                       | 0.462                                | 1.000                              | 11.929                | 0.561                             | 0.540                         | 0.407                     | 0.408                    | 0.413                      | 0.569                               | 0.363                               |
|                 | Repl. 3                                     | 0.246                       | 0.387                       | 0.312                                | 0.602                              | 8.111                 | 0.364                             | 0.397                         | 0.495                     | 0.276                    | 0.304                      | 0.406                               | 0.258                               |
|                 | <b>Mean</b>                                 | <b>0.278</b>                | <b>0.451</b>                | <b>0.393</b>                         | <b>0.803</b>                       | <b>9.741</b>          | <b>0.464</b>                      | <b>0.481</b>                  | <b>0.408</b>              | <b>0.344</b>             | <b>0.359</b>               | <b>0.486</b>                        | <b>0.311</b>                        |
|                 | <b>SD</b>                                   | <b>0.024</b>                | <b>0.052</b>                | <b>0.062</b>                         | <b>0.163</b>                       | <b>1.608</b>          | <b>0.080</b>                      | <b>0.061</b>                  | <b>0.071</b>              | <b>0.054</b>             | <b>0.044</b>               | <b>0.067</b>                        | <b>0.043</b>                        |
|                 | <b>%RSD</b>                                 | <b>8.6</b>                  | <b>11.5</b>                 | <b>15.7</b>                          | <b>20.2</b>                        | <b>16.5</b>           | <b>17.3</b>                       | <b>12.7</b>                   | <b>17.3</b>               | <b>15.7</b>              | <b>12.4</b>                | <b>13.7</b>                         | <b>13.8</b>                         |
| <b>100</b>      | Repl. 1                                     | 0.734                       | 0.946                       | 0.902                                | 1.441                              | 10.612                | 1.002                             | 1.003                         | 0.796                     | 0.792                    | 0.789                      | 1.068                               | 0.809                               |
|                 | Repl. 2                                     | 0.728                       | 0.929                       | 0.899                                | 1.404                              | 9.954                 | 0.962                             | 0.959                         | 0.854                     | 0.764                    | 0.801                      | 1.068                               | 0.809                               |
|                 | Repl. 3                                     | 0.743                       | 0.915                       | 0.880                                | 1.398                              | 10.330                | 0.871                             | 0.867                         | 0.815                     | 0.719                    | 0.733                      | 0.992                               | 0.760                               |
|                 | <b>Mean</b>                                 | <b>0.735</b>                | <b>0.930</b>                | <b>0.893</b>                         | <b>1.415</b>                       | <b>10.299</b>         | <b>0.945</b>                      | <b>0.943</b>                  | <b>0.822</b>              | <b>0.759</b>             | <b>0.775</b>               | <b>1.043</b>                        | <b>0.793</b>                        |
|                 | <b>SD</b>                                   | <b>0.006</b>                | <b>0.013</b>                | <b>0.010</b>                         | <b>0.019</b>                       | <b>0.270</b>          | <b>0.055</b>                      | <b>0.057</b>                  | <b>0.024</b>              | <b>0.030</b>             | <b>0.030</b>               | <b>0.036</b>                        | <b>0.023</b>                        |
|                 | <b>%RSD</b>                                 | <b>0.86</b>                 | <b>1.4</b>                  | <b>1.1</b>                           | <b>1.4</b>                         | <b>2.6</b>            | <b>5.8</b>                        | <b>6.0</b>                    | <b>2.9</b>                | <b>4.0</b>               | <b>3.9</b>                 | <b>3.4</b>                          | <b>2.9</b>                          |

**Table S16b.** SIFT-MS accuracy data for Class 2B solvents (Run 2) in the oral suspension product. Values in red do not meet acceptance criteria ( $\pm 20\%$  of spiked value).

| Spike Level / % | Replicate Number and Statistical Parameters | Chloroform (O <sub>2</sub> <sup>+</sup> 83) | Chloroform (O <sub>2</sub> <sup>+</sup> 85) | 1,2-Dimethoxyethane (H <sub>3</sub> O <sup>+</sup> 91) | 1,2-Dimethoxyethane (NO <sup>+</sup> 89) | Hexane (NO <sup>+</sup> 85) | Methylbutylketone (NO <sup>+</sup> 130) | Nitromethane (H <sub>3</sub> O <sup>+</sup> 62) | Pyridine (H <sub>3</sub> O <sup>+</sup> 80) | Tetralin (NO <sup>+</sup> 132) | Tetralin (O <sub>2</sub> <sup>+</sup> 104) | Trichloroethylene (O <sub>2</sub> <sup>+</sup> 130) | Trichloroethylene (O <sub>2</sub> <sup>+</sup> 132) |
|-----------------|---------------------------------------------|---------------------------------------------|---------------------------------------------|--------------------------------------------------------|------------------------------------------|-----------------------------|-----------------------------------------|-------------------------------------------------|---------------------------------------------|--------------------------------|--------------------------------------------|-----------------------------------------------------|-----------------------------------------------------|
| <b>50</b>       | Repl. 1                                     | 0.456                                       | 0.495                                       | 0.473                                                  | 0.498                                    | 0.651                       | 0.520                                   | 0.525                                           | 0.395                                       | 0.477                          | 0.485                                      | 0.492                                               | 0.433                                               |
|                 | Repl. 2                                     | 0.437                                       | 0.477                                       | 0.458                                                  | 0.496                                    | 0.614                       | 0.512                                   | 0.466                                           | 0.471                                       | 0.468                          | 0.468                                      | 0.479                                               | 0.433                                               |
|                 | Repl. 3                                     | 0.430                                       | 0.473                                       | 0.456                                                  | 0.483                                    | 0.615                       | 0.490                                   | 0.473                                           | 0.426                                       | 0.456                          | 0.456                                      | 0.478                                               | 0.421                                               |
|                 | <b>Mean</b>                                 | <b>0.441</b>                                | <b>0.482</b>                                | <b>0.462</b>                                           | <b>0.492</b>                             | <b>0.627</b>                | <b>0.507</b>                            | <b>0.488</b>                                    | <b>0.431</b>                                | <b>0.467</b>                   | <b>0.469</b>                               | <b>0.483</b>                                        | <b>0.429</b>                                        |
|                 | <b>SD</b>                                   | <b>0.011</b>                                | <b>0.010</b>                                | <b>0.008</b>                                           | <b>0.007</b>                             | <b>0.017</b>                | <b>0.013</b>                            | <b>0.026</b>                                    | <b>0.032</b>                                | <b>0.009</b>                   | <b>0.012</b>                               | <b>0.007</b>                                        | <b>0.006</b>                                        |
|                 | <b>%RSD</b>                                 | <b>2.5</b>                                  | <b>2.0</b>                                  | <b>1.6</b>                                             | <b>1.4</b>                               | <b>2.8</b>                  | <b>2.5</b>                              | <b>5.4</b>                                      | <b>7.3</b>                                  | <b>1.9</b>                     | <b>2.5</b>                                 | <b>1.4</b>                                          | <b>1.4</b>                                          |
| <b>100</b>      | Repl. 1                                     | 1.113                                       | 1.033                                       | 1.061                                                  | 1.029                                    | 1.112                       | 0.983                                   | 0.953                                           | 1.042                                       | 1.041                          | 1.042                                      | 1.126                                               | 1.074                                               |
|                 | Repl. 2                                     | 1.103                                       | 0.897                                       | 0.949                                                  | 0.912                                    | 1.057                       | 0.842                                   | 0.829                                           | 0.971                                       | 0.932                          | 0.961                                      | 1.075                                               | 0.987                                               |
|                 | Repl. 3                                     | 1.088                                       | 0.954                                       | 0.981                                                  | 0.959                                    | 1.106                       | 0.912                                   | 0.874                                           | 1.011                                       | 0.984                          | 0.977                                      | 1.083                                               | 1.021                                               |
|                 | <b>Mean</b>                                 | <b>1.101</b>                                | <b>0.961</b>                                | <b>0.997</b>                                           | <b>0.966</b>                             | <b>1.092</b>                | <b>0.912</b>                            | <b>0.885</b>                                    | <b>1.008</b>                                | <b>0.986</b>                   | <b>0.994</b>                               | <b>1.095</b>                                        | <b>1.027</b>                                        |
|                 | <b>SD</b>                                   | <b>0.010</b>                                | <b>0.056</b>                                | <b>0.047</b>                                           | <b>0.048</b>                             | <b>0.025</b>                | <b>0.057</b>                            | <b>0.051</b>                                    | <b>0.029</b>                                | <b>0.045</b>                   | <b>0.035</b>                               | <b>0.023</b>                                        | <b>0.036</b>                                        |
|                 | <b>%RSD</b>                                 | <b>0.91</b>                                 | <b>5.8</b>                                  | <b>4.8</b>                                             | <b>5.0</b>                               | <b>2.3</b>                  | <b>6.3</b>                              | <b>5.8</b>                                      | <b>2.9</b>                                  | <b>4.5</b>                     | <b>3.5</b>                                 | <b>2.1</b>                                          | <b>3.5</b>                                          |

**Table S17a.** GC-FID accuracy data for Class 2A solvents (Run 1) in the oral suspension product. Values in red do not meet acceptance criteria ( $\pm 20\%$  of spiked value).

| Spike Level / % | Replicate Number and Statistical Parameters | Acetonitrile | Chlorobenzene | Cumene       | Cyclohexane  | 1,2-Dichloroethene | 1,4-Dioxane  | Methanol     | Methylcyclohexane | Methylene chloride | Tetrahydrofuran | Toluene      | Xylene       |
|-----------------|---------------------------------------------|--------------|---------------|--------------|--------------|--------------------|--------------|--------------|-------------------|--------------------|-----------------|--------------|--------------|
| <b>50</b>       | Repl. 1                                     | 0.539        | 0.441         | 0.377        | 0.344        | 0.441              | 0.494        | 0.458        | 0.286             | 0.446              | 0.445           | 0.441        | 0.466        |
|                 | Repl. 2                                     | 0.675        | 0.429         | 0.352        | 0.301        | 0.410              | 0.544        | 0.521        | 0.239             | 0.456              | 0.442           | 0.425        | 0.457        |
|                 | Repl. 3                                     | 0.523        | 0.420         | 0.371        | 0.340        | 0.430              | 0.470        | 0.455        | 0.284             | 0.441              | 0.441           | 0.436        | 0.456        |
|                 | <b>Mean</b>                                 | <b>0.579</b> | <b>0.430</b>  | <b>0.367</b> | <b>0.328</b> | <b>0.427</b>       | <b>0.503</b> | <b>0.478</b> | <b>0.270</b>      | <b>0.448</b>       | <b>0.443</b>    | <b>0.434</b> | <b>0.460</b> |
|                 | <b>SD</b>                                   | <b>0.084</b> | <b>0.010</b>  | <b>0.013</b> | <b>0.024</b> | <b>0.016</b>       | <b>0.038</b> | <b>0.037</b> | <b>0.026</b>      | <b>0.008</b>       | <b>0.002</b>    | <b>0.008</b> | <b>0.005</b> |
|                 | <b>%RSD</b>                                 | <b>14.4</b>  | <b>2.4</b>    | <b>3.6</b>   | <b>7.3</b>   | <b>3.7</b>         | <b>7.6</b>   | <b>7.8</b>   | <b>9.8</b>        | <b>1.7</b>         | <b>0.5</b>      | <b>1.9</b>   | <b>1.1</b>   |
| <b>100</b>      | Repl. 1                                     | 1.23         | 0.886         | 0.855        | 0.861        | 0.931              | 0.986        | 0.930        | 0.805             | 0.936              | 0.922           | 0.923        | 0.930        |
|                 | Repl. 2                                     | 1.20         | 0.777         | 0.592        | 0.776        | 0.898              | 0.946        | 0.904        | 0.648             | 0.915              | 0.899           | 0.828        | 0.767        |
|                 | Repl. 3                                     | 1.27         | 0.900         | 0.815        | 0.834        | 0.925              | 0.975        | 0.963        | 0.745             | 0.940              | 0.937           | 0.923        | 0.926        |
|                 | <b>Mean</b>                                 | <b>1.23</b>  | <b>0.854</b>  | <b>0.754</b> | <b>0.824</b> | <b>0.918</b>       | <b>0.969</b> | <b>0.932</b> | <b>0.732</b>      | <b>0.931</b>       | <b>0.919</b>    | <b>0.891</b> | <b>0.874</b> |
|                 | <b>SD</b>                                   | <b>0.035</b> | <b>0.068</b>  | <b>0.142</b> | <b>0.043</b> | <b>0.018</b>       | <b>0.021</b> | <b>0.029</b> | <b>0.079</b>      | <b>0.014</b>       | <b>0.019</b>    | <b>0.055</b> | <b>0.093</b> |
|                 | <b>%RSD</b>                                 | <b>2.9</b>   | <b>7.9</b>    | <b>18.8</b>  | <b>5.3</b>   | <b>2.0</b>         | <b>2.1</b>   | <b>3.1</b>   | <b>10.8</b>       | <b>1.5</b>         | <b>2.1</b>      | <b>6.1</b>   | <b>10.6</b>  |

**Table S17b.** GC-FID accuracy data for Class 2A solvents (Run 2) in the oral suspension product. GC-FID response is peak area. Values in red do not meet acceptance criteria ( $\pm 20\%$  of spiked value), while values in gray are outliers and are not included in calculations.

| Spike Level / % | Replicate Number and Statistical Parameters | Acetonitrile | Chlorobenzene | Cumene       | Cyclohexane  | 1,2-Dichloroethene | 1,4-Dioxane  | Methanol     | Methylcyclohexane | Methylene chloride | Tetrahydrofuran | Toluene      | Xylene       |
|-----------------|---------------------------------------------|--------------|---------------|--------------|--------------|--------------------|--------------|--------------|-------------------|--------------------|-----------------|--------------|--------------|
| <b>50</b>       | Repl. 1                                     | 0.365        | 0.273         | 0.180        | 0.249        | 0.295              | 0.325        | 0.783        | 0.217             | 0.280              | 0.151           | 0.283        | 0.256        |
|                 | Repl. 2                                     | 0.518        | 0.452         | 0.438        | 0.442        | 0.481              | 0.499        | 0.504        | 0.397             | 0.474              | 0.477           | 0.478        | 0.468        |
|                 | Repl. 3                                     | 0.474        | 0.458         | 0.457        | 0.463        | 0.473              | 0.461        | 0.499        | 0.443             | 0.467              | 0.461           | 0.472        | 0.470        |
|                 | <b>Mean</b>                                 | <b>0.496</b> | <b>0.455</b>  | <b>0.447</b> | <b>0.453</b> | <b>0.477</b>       | <b>0.480</b> | <b>0.502</b> | <b>0.420</b>      | <b>0.470</b>       | <b>0.469</b>    | <b>0.475</b> | <b>0.469</b> |
|                 | <b>SD</b>                                   | <b>0.022</b> | <b>0.004</b>  | <b>0.009</b> | <b>0.011</b> | <b>0.004</b>       | <b>0.019</b> | <b>0.003</b> | <b>0.023</b>      | <b>0.004</b>       | <b>0.008</b>    | <b>0.003</b> | <b>0.002</b> |
|                 | <b>%RSD</b>                                 | <b>4.5</b>   | <b>1.0</b>    | <b>2.0</b>   | <b>2.4</b>   | <b>0.81</b>        | <b>4.0</b>   | <b>0.53</b>  | <b>5.5</b>        | <b>0.81</b>        | <b>1.7</b>      | <b>0.64</b>  | <b>0.37</b>  |
| <b>100</b>      | Repl. 1                                     | 0.741        | 0.957         | 0.979        | 1.079        | 1.030              | 0.699        | 0.689        | 1.059             | 0.930              | 0.975           | 0.998        | 0.982        |
|                 | Repl. 2                                     | 0.824        | 0.933         | 0.995        | 1.080        | 1.009              | 0.799        | 0.775        | 1.084             | 0.925              | 0.962           | 0.989        | 0.981        |
|                 | Repl. 3                                     | 0.815        | 0.949         | 0.997        | 1.078        | 1.015              | 0.819        | 0.850        | 1.075             | 0.918              | 0.963           | 0.988        | 0.980        |
|                 | <b>Mean</b>                                 | <b>0.793</b> | <b>0.946</b>  | <b>0.991</b> | <b>1.079</b> | <b>1.018</b>       | <b>0.772</b> | <b>0.771</b> | <b>1.072</b>      | <b>0.924</b>       | <b>0.967</b>    | <b>0.992</b> | <b>0.981</b> |
|                 | <b>SD</b>                                   | <b>0.037</b> | <b>0.013</b>  | <b>0.008</b> | <b>0.001</b> | <b>0.009</b>       | <b>0.052</b> | <b>0.066</b> | <b>0.010</b>      | <b>0.005</b>       | <b>0.006</b>    | <b>0.005</b> | <b>0.001</b> |
|                 | <b>%RSD</b>                                 | <b>4.7</b>   | <b>1.3</b>    | <b>0.80</b>  | <b>0.08</b>  | <b>0.86</b>        | <b>6.8</b>   | <b>8.6</b>   | <b>1.0</b>        | <b>0.54</b>        | <b>0.62</b>     | <b>0.45</b>  | <b>0.11</b>  |

**Table S18a.** GC-FID accuracy data for Class 2B solvents (Run 1) in the oral suspension product. Values in red do not meet acceptance criteria ( $\pm 20\%$  of spiked value).

| Spike Level / % | Replicate Number and Statistical Parameters | Chloroform   | 1,2-Dimethoxyethane | Hexane       | Methylbutylketone | Nitromethane | Pyridine     | Tetralin     | Trichloroethylene |
|-----------------|---------------------------------------------|--------------|---------------------|--------------|-------------------|--------------|--------------|--------------|-------------------|
| <b>50</b>       | Repl. 1                                     | 0.479        | 0.253               | 0.408        | 0.390             | 0.388        | 0.414        | 0.440        | 0.466             |
|                 | Repl. 2                                     | 0.531        | 0.171               | 0.366        | 0.492             | 0.390        | 0.458        | 0.458        | 0.439             |
|                 | Repl. 3                                     | 0.474        | 0.219               | 0.398        | 0.418             | 0.376        | 0.425        | 0.427        | 0.470             |
|                 | <b>Mean</b>                                 | <b>0.495</b> | <b>0.214</b>        | <b>0.391</b> | <b>0.433</b>      | <b>0.385</b> | <b>0.432</b> | <b>0.442</b> | <b>0.458</b>      |
|                 | <b>SD</b>                                   | <b>0.032</b> | <b>0.041</b>        | <b>0.022</b> | <b>0.053</b>      | <b>0.008</b> | <b>0.023</b> | <b>0.015</b> | <b>0.017</b>      |
|                 | <b>%RSD</b>                                 | <b>6.4</b>   | <b>19.1</b>         | <b>5.6</b>   | <b>12.2</b>       | <b>2.0</b>   | <b>5.2</b>   | <b>3.5</b>   | <b>3.7</b>        |
| <b>100</b>      | Repl. 1                                     | 1.04         | 0.280               | 0.900        | 0.907             | 0.874        | 0.843        | 0.894        | 1.02              |
|                 | Repl. 2                                     | 1.00         | 0.190               | 0.857        | 0.863             | 0.822        | 0.802        | 0.671        | 0.928             |
|                 | Repl. 3                                     | 1.05         | 0.274               | 0.885        | 0.892             | 0.825        | 0.844        | 0.877        | 1.03              |
|                 | <b>Mean</b>                                 | <b>1.03</b>  | <b>0.248</b>        | <b>0.881</b> | <b>0.887</b>      | <b>0.840</b> | <b>0.830</b> | <b>0.814</b> | <b>0.991</b>      |
|                 | <b>SD</b>                                   | <b>0.027</b> | <b>0.050</b>        | <b>0.022</b> | <b>0.022</b>      | <b>0.029</b> | <b>0.024</b> | <b>0.124</b> | <b>0.055</b>      |
|                 | <b>%RSD</b>                                 | <b>2.7</b>   | <b>20.3</b>         | <b>2.5</b>   | <b>2.5</b>        | <b>3.5</b>   | <b>2.9</b>   | <b>15.3</b>  | <b>5.6</b>        |

**Table S18b.** GC-FID accuracy data for Class 2B solvents (Run 2) in the oral suspension product. Values in red do not meet acceptance criteria ( $\pm 20\%$  of spiked value), while values in gray are outliers and are not included in calculations.

| Spike Level / % | Replicate Number and Statistical Parameters | Chloroform   | 1,2-Dimethoxyethane | Hexane       | Methylbutylketone | Nitromethane | Pyridine     | Tetralin     | Trichloroethylene |
|-----------------|---------------------------------------------|--------------|---------------------|--------------|-------------------|--------------|--------------|--------------|-------------------|
| 50              | Repl. 1                                     | 0.339        | 0.318               | 0.208        | 0.314             | 0.193        | 0.421        | 0.308        | 0.247             |
|                 | Repl. 2                                     | 0.447        | 0.436               | 0.484        | 0.448             | 0.507        | 0.573        | 0.469        | 0.474             |
|                 | Repl. 3                                     | 0.446        | 0.336               | 0.474        | 0.434             | 0.423        | 0.568        | 0.459        | 0.467             |
|                 | <b>Mean</b>                                 | <b>0.446</b> | <b>0.386</b>        | <b>0.479</b> | <b>0.441</b>      | <b>0.465</b> | <b>0.570</b> | <b>0.464</b> | <b>0.470</b>      |
|                 | <b>SD</b>                                   | <b>0.001</b> | <b>0.050</b>        | <b>0.005</b> | <b>0.007</b>      | <b>0.042</b> | <b>0.003</b> | <b>0.005</b> | <b>0.004</b>      |
|                 | <b>%RSD</b>                                 | <b>0.12</b>  | <b>12.9</b>         | <b>1.1</b>   | <b>1.6</b>        | <b>9.0</b>   | <b>0.49</b>  | <b>1.1</b>   | <b>0.75</b>       |
| 100             | Repl. 1                                     | 0.790        | 0.611               | 1.070        | 0.790             | 1.023        | 1.014        | 0.888        | 0.976             |
|                 | Repl. 2                                     | 0.796        | 0.749               | 1.062        | 0.783             | 1.011        | 1.016        | 0.895        | 0.977             |
|                 | Repl. 3                                     | 0.800        | 0.946               | 1.071        | 0.803             | 1.063        | 1.013        | 0.895        | 0.984             |
|                 | <b>Mean</b>                                 | <b>0.796</b> | <b>0.769</b>        | <b>1.068</b> | <b>0.792</b>      | <b>1.032</b> | <b>1.014</b> | <b>0.893</b> | <b>0.979</b>      |
|                 | <b>SD</b>                                   | <b>0.004</b> | <b>0.137</b>        | <b>0.004</b> | <b>0.008</b>      | <b>0.022</b> | <b>0.001</b> | <b>0.004</b> | <b>0.004</b>      |
|                 | <b>%RSD</b>                                 | <b>0.53</b>  | <b>17.9</b>         | <b>0.35</b>  | <b>1.0</b>        | <b>2.1</b>   | <b>0.11</b>  | <b>0.41</b>  | <b>0.38</b>       |



## E. Recovery

### E.1. Tablet

**Table S19a.** SIFT-MS recovery data for Class 2A solvents (Run 1) in the tableted product. All data are percentages. Values in red do not meet acceptance criteria ( $\pm 20\%$  of spiked value).

| Spike Level / % | Replicate Number and Statistical Parameters | Acetonitrile (H <sub>3</sub> O <sup>+</sup> 42) | Chlorobenzene (O <sub>2</sub> <sup>+</sup> 112) | Chlorobenzene (O <sub>2</sub> <sup>+</sup> 114) | Cumene (NO <sup>+</sup> 120) | Cyclohexane (NO <sup>+</sup> 83) | Cyclohexane (O <sub>2</sub> <sup>+</sup> 84) | 1,2-Dichloroethene (H <sub>3</sub> O <sup>+</sup> 99) | 1,2-Dichloroethene (O <sub>2</sub> <sup>+</sup> 96) | 1,2-Dichloroethene (O <sub>2</sub> <sup>+</sup> 98) | 1,4-Dioxane (H <sub>3</sub> O <sup>+</sup> 89) | 1,4-Dioxane (NO <sup>+</sup> 87) | 1,4-Dioxane (NO <sup>+</sup> 88) | Methanol (H <sub>3</sub> O <sup>+</sup> 33) | Methylcyclohexane (NO <sup>+</sup> 97) | Methylene chloride (O <sub>2</sub> <sup>+</sup> 84) | Methylene chloride (O <sub>2</sub> <sup>+</sup> 86) | Tetrahydrofuran (NO <sup>+</sup> 71) | Toluene (NO <sup>+</sup> 92) | Toluene (O <sub>2</sub> <sup>+</sup> 92) | Xylene (NO <sup>+</sup> 106) |
|-----------------|---------------------------------------------|-------------------------------------------------|-------------------------------------------------|-------------------------------------------------|------------------------------|----------------------------------|----------------------------------------------|-------------------------------------------------------|-----------------------------------------------------|-----------------------------------------------------|------------------------------------------------|----------------------------------|----------------------------------|---------------------------------------------|----------------------------------------|-----------------------------------------------------|-----------------------------------------------------|--------------------------------------|------------------------------|------------------------------------------|------------------------------|
| 50              | Repl. 1                                     | 87.7                                            | 81.0                                            | 80.2                                            | 74.0                         | 69.5                             | 74.2                                         | 87.0                                                  | 88.2                                                | 79.2                                                | 89.9                                           | 78.7                             | 76.3                             | 89.8                                        | 59.5                                   | 71.5                                                | 82.3                                                | 82.9                                 | 90.1                         | 81.4                                     | 80.6                         |
|                 | Repl. 2                                     | 89.2                                            | 81.5                                            | 81.9                                            | 76.5                         | 68.6                             | 72.7                                         | 76.7                                                  | 89.0                                                | 81.2                                                | 92.3                                           | 89.9                             | 80.6                             | 92.2                                        | 59.3                                   | 69.7                                                | 79.5                                                | 88.4                                 | 93.5                         | 82.3                                     | 81.9                         |
|                 | Repl. 3                                     | 88.4                                            | 79.3                                            | 80.2                                            | 72.8                         | 66.0                             | 70.1                                         | 80.3                                                  | 85.3                                                | 77.8                                                | 80.0                                           | 80.9                             | 76.6                             | 87.3                                        | 56.1                                   | 67.4                                                | 79.2                                                | 85.2                                 | 89.1                         | 77.1                                     | 79.9                         |
|                 | Mean                                        | 88.4                                            | 80.6                                            | 80.8                                            | 74.4                         | 68.0                             | 72.3                                         | 81.3                                                  | 87.5                                                | 79.4                                                | 87.4                                           | 83.2                             | 77.8                             | 89.8                                        | 58.3                                   | 69.5                                                | 80.4                                                | 85.5                                 | 90.9                         | 80.2                                     | 80.8                         |
|                 | SD                                          | 0.63                                            | 0.94                                            | 0.82                                            | 1.5                          | 1.5                              | 1.7                                          | 4.3                                                   | 1.6                                                 | 1.4                                                 | 5.3                                            | 4.8                              | 2.0                              | 2.0                                         | 1.6                                    | 1.7                                                 | 1.4                                                 | 2.2                                  | 1.9                          | 2.3                                      | 0.85                         |
|                 | %RSD                                        | 0.72                                            | 1.2                                             | 1.0                                             | 2.0                          | 2.2                              | 2.4                                          | 5.2                                                   | 1.8                                                 | 1.7                                                 | 6.1                                            | 5.8                              | 2.5                              | 2.2                                         | 2.7                                    | 2.4                                                 | 1.7                                                 | 2.6                                  | 2.1                          | 2.8                                      | 1.1                          |
| 100             | Repl. 1                                     | 90.8                                            | 94.1                                            | 92.9                                            | 120.2                        | 84.8                             | 81.2                                         | 94.0                                                  | 95.8                                                | 91.0                                                | 92.2                                           | 86.5                             | 82.0                             | 88.2                                        | 76.5                                   | 80.6                                                | 88.3                                                | 88.2                                 | 96.9                         | 92.8                                     | 105.8                        |
|                 | Repl. 2                                     | 91.2                                            | 90.7                                            | 89.1                                            | 85.6                         | 78.4                             | 78.3                                         | 90.8                                                  | 94.8                                                | 87.2                                                | 89.4                                           | 90.6                             | 85.5                             | 92.4                                        | 68.8                                   | 77.0                                                | 84.4                                                | 89.0                                 | 93.8                         | 91.1                                     | 89.6                         |
|                 | Repl. 3                                     | 91.2                                            | 89.9                                            | 91.1                                            | 80.8                         | 77.3                             | 76.3                                         | 85.9                                                  | 94.8                                                | 85.5                                                | 92.8                                           | 81.5                             | 87.7                             | 87.9                                        | 66.4                                   | 74.5                                                | 85.2                                                | 89.7                                 | 94.4                         | 91.1                                     | 87.9                         |
|                 | Mean                                        | 91.1                                            | 91.6                                            | 91.0                                            | 95.6                         | 80.2                             | 78.6                                         | 90.2                                                  | 95.1                                                | 87.9                                                | 91.5                                           | 86.2                             | 85.1                             | 89.5                                        | 70.6                                   | 77.4                                                | 86.0                                                | 89.0                                 | 95.0                         | 91.7                                     | 94.5                         |
|                 | SD                                          | 0.18                                            | 1.8                                             | 1.5                                             | 17.5                         | 3.32                             | 2.0                                          | 3.4                                                   | 0.51                                                | 2.3                                                 | 1.5                                            | 3.7                              | 2.4                              | 2.1                                         | 4.3                                    | 2.5                                                 | 1.7                                                 | 0.62                                 | 1.4                          | 0.82                                     | 8.1                          |
|                 | %RSD                                        | 0.20                                            | 2.0                                             | 1.7                                             | 18.4                         | 4.14                             | 2.6                                          | 3.7                                                   | 0.54                                                | 2.6                                                 | 1.6                                            | 4.3                              | 2.8                              | 2.3                                         | 6.1                                    | 3.3                                                 | 2.0                                                 | 0.70                                 | 1.4                          | 0.90                                     | 8.6                          |

**Table S19b.** SIFT-MS recovery data for Class 2A solvents (Run 2) in the tableted product. All data are percentages.

| <b>Spike Level / %</b> | <b>Replicate Number and Statistical Parameters</b> | <b>Acetonitrile (H<sub>3</sub>O<sup>+</sup> 42)</b> | <b>Chlorobenzene (O<sub>2</sub><sup>+</sup> 112)</b> | <b>Chlorobenzene (O<sub>2</sub><sup>+</sup> 114)</b> | <b>Cumene (NO<sup>+</sup> 120)</b> | <b>Cyclohexane (NO<sup>+</sup> 83)</b> | <b>Cyclohexane (O<sub>2</sub><sup>+</sup> 84)</b> | <b>1,2-Dichloroethene (H<sub>3</sub>O<sup>+</sup> 99)</b> | <b>1,2-Dichloroethene (O<sub>2</sub><sup>+</sup> 96)</b> | <b>1,2-Dichloroethene (O<sub>2</sub><sup>+</sup> 98)</b> | <b>1,4-Dioxane (H<sub>3</sub>O<sup>+</sup> 89)</b> | <b>1,4-Dioxane (NO<sup>+</sup> 87)</b> | <b>1,4-Dioxane (NO<sup>+</sup> 88)</b> | <b>Methanol (H<sub>3</sub>O<sup>+</sup> 33)</b> | <b>Methylcyclohexane (NO<sup>+</sup> 97)</b> | <b>Methylene chloride (O<sub>2</sub><sup>+</sup> 84)</b> | <b>Methylene chloride (O<sub>2</sub><sup>+</sup> 86)</b> | <b>Tetrahydrofuran (NO<sup>+</sup> 71)</b> | <b>Toluene (NO<sup>+</sup> 92)</b> | <b>Toluene (O<sub>2</sub><sup>+</sup> 92)</b> | <b>Xylene (NO<sup>+</sup> 106)</b> |
|------------------------|----------------------------------------------------|-----------------------------------------------------|------------------------------------------------------|------------------------------------------------------|------------------------------------|----------------------------------------|---------------------------------------------------|-----------------------------------------------------------|----------------------------------------------------------|----------------------------------------------------------|----------------------------------------------------|----------------------------------------|----------------------------------------|-------------------------------------------------|----------------------------------------------|----------------------------------------------------------|----------------------------------------------------------|--------------------------------------------|------------------------------------|-----------------------------------------------|------------------------------------|
| <b>50</b>              | Repl. 1                                            | 105.0                                               | 92.6                                                 | 94.2                                                 | 87.4                               | 95.3                                   | 100.0                                             | 105.3                                                     | 98.3                                                     | 96.2                                                     | 98.4                                               | 85.5                                   | 96.0                                   | 95.1                                            | 86.0                                         | 96.4                                                     | 95.1                                                     | 93.4                                       | 100.7                              | 92.7                                          | 91.2                               |
|                        | Repl. 2                                            | 85.4                                                | 76.1                                                 | 77.5                                                 | 75.1                               | 69.5                                   | 83.1                                              | 68.0                                                      | 81.6                                                     | 80.9                                                     | 82.3                                               | 96.8                                   | 91.1                                   | 86.8                                            | 76.8                                         | 79.5                                                     | 77.7                                                     | 81.6                                       | 82.6                               | 75.2                                          | 75.9                               |
|                        | Repl. 3                                            | 116.3                                               | 99.9                                                 | 101.3                                                | 92.5                               | 95.3                                   | 101.0                                             | 107.5                                                     | 103.8                                                    | 101.1                                                    | 106.3                                              | 109.1                                  | 106.7                                  | 107.7                                           | 88.6                                         | 98.0                                                     | 103.2                                                    | 105.3                                      | 106.0                              | 97.7                                          | 96.2                               |
|                        | <b>Mean</b>                                        | <b>102.3</b>                                        | <b>89.5</b>                                          | <b>91.0</b>                                          | <b>85.0</b>                        | <b>86.7</b>                            | <b>94.7</b>                                       | <b>93.6</b>                                               | <b>94.6</b>                                              | <b>92.7</b>                                              | <b>95.7</b>                                        | <b>97.1</b>                            | <b>97.9</b>                            | <b>96.5</b>                                     | <b>83.8</b>                                  | <b>91.3</b>                                              | <b>92.0</b>                                              | <b>93.4</b>                                | <b>96.4</b>                        | <b>88.5</b>                                   | <b>87.8</b>                        |
|                        | <b>SD</b>                                          | <b>12.8</b>                                         | <b>9.9</b>                                           | <b>10.0</b>                                          | <b>7.3</b>                         | <b>12.1</b>                            | <b>8.2</b>                                        | <b>18.1</b>                                               | <b>9.4</b>                                               | <b>8.6</b>                                               | <b>10.0</b>                                        | <b>9.6</b>                             | <b>6.5</b>                             | <b>8.6</b>                                      | <b>5.1</b>                                   | <b>8.4</b>                                               | <b>10.6</b>                                              | <b>9.7</b>                                 | <b>10.0</b>                        | <b>9.6</b>                                    | <b>8.6</b>                         |
|                        | <b>%RSD</b>                                        | <b>12.5</b>                                         | <b>11.1</b>                                          | <b>10.9</b>                                          | <b>8.6</b>                         | <b>14.0</b>                            | <b>8.7</b>                                        | <b>19.3</b>                                               | <b>10.0</b>                                              | <b>9.3</b>                                               | <b>10.4</b>                                        | <b>9.9</b>                             | <b>6.7</b>                             | <b>8.9</b>                                      | <b>6.0</b>                                   | <b>9.2</b>                                               | <b>11.5</b>                                              | <b>10.4</b>                                | <b>10.4</b>                        | <b>10.9</b>                                   | <b>9.8</b>                         |
| <b>100</b>             | Repl. 1                                            | 86.8                                                | 95.7                                                 | 95.3                                                 | 105.9                              | 112.6                                  | 109.5                                             | 94.7                                                      | 97.9                                                     | 100.5                                                    | 77.8                                               | 86.9                                   | 87.4                                   | 83.1                                            | 115.0                                        | 109.1                                                    | 88.0                                                     | 81.5                                       | 100.1                              | 98.7                                          | 99.5                               |
|                        | Repl. 2                                            | 91.3                                                | 100.9                                                | 102.0                                                | 105.9                              | 113.4                                  | 111.9                                             | 107.6                                                     | 103.4                                                    | 106.0                                                    | 91.9                                               | 96.6                                   | 84.9                                   | 90.9                                            | 114.1                                        | 111.6                                                    | 94.5                                                     | 87.4                                       | 103.9                              | 104.2                                         | 103.3                              |
|                        | Repl. 3                                            | 89.4                                                | 98.4                                                 | 99.8                                                 | 100.8                              | 111.8                                  | 109.5                                             | 107.4                                                     | 101.1                                                    | 102.3                                                    | 91.1                                               | 77.2                                   | 84.9                                   | 85.4                                            | 106.7                                        | 109.1                                                    | 93.9                                                     | 84.4                                       | 102.7                              | 100.5                                         | 99.5                               |
|                        | <b>Mean</b>                                        | <b>89.2</b>                                         | <b>98.3</b>                                          | <b>99.0</b>                                          | <b>104.2</b>                       | <b>112.6</b>                           | <b>110.3</b>                                      | <b>103.2</b>                                              | <b>100.8</b>                                             | <b>103.0</b>                                             | <b>86.9</b>                                        | <b>86.9</b>                            | <b>85.7</b>                            | <b>86.5</b>                                     | <b>112.0</b>                                 | <b>110.0</b>                                             | <b>92.1</b>                                              | <b>84.4</b>                                | <b>102.2</b>                       | <b>101.1</b>                                  | <b>100.8</b>                       |
|                        | <b>SD</b>                                          | <b>1.9</b>                                          | <b>2.1</b>                                           | <b>2.8</b>                                           | <b>2.4</b>                         | <b>0.67</b>                            | <b>1.1</b>                                        | <b>6.0</b>                                                | <b>2.3</b>                                               | <b>2.3</b>                                               | <b>6.5</b>                                         | <b>7.9</b>                             | <b>1.2</b>                             | <b>3.3</b>                                      | <b>3.7</b>                                   | <b>1.2</b>                                               | <b>2.9</b>                                               | <b>2.4</b>                                 | <b>1.6</b>                         | <b>2.3</b>                                    | <b>1.8</b>                         |
|                        | <b>%RSD</b>                                        | <b>2.1</b>                                          | <b>2.2</b>                                           | <b>2.8</b>                                           | <b>2.3</b>                         | <b>0.60</b>                            | <b>1.0</b>                                        | <b>5.8</b>                                                | <b>2.3</b>                                               | <b>2.2</b>                                               | <b>7.4</b>                                         | <b>9.1</b>                             | <b>1.4</b>                             | <b>3.8</b>                                      | <b>3.3</b>                                   | <b>1.1</b>                                               | <b>3.2</b>                                               | <b>2.8</b>                                 | <b>1.6</b>                         | <b>2.3</b>                                    | <b>1.8</b>                         |

**Table S20a.** SIFT-MS recovery data for Class 2B solvents (Run 1) in the tableted product. All data are percentages. Values in red do not meet acceptance criteria ( $\pm 20\%$  of spiked value).

| Spike Level / % | Replicate Number and Statistical Parameters | Chloroform ( $\text{O}_2^{+} 83$ ) | Chloroform ( $\text{O}_2^{+} 85$ ) | 1,2-Dimethoxyethane ( $\text{H}_3\text{O}^{+} 91$ ) | 1,2-Dimethoxyethane ( $\text{NO}^{+} 89$ ) | Hexane ( $\text{NO}^{+} 85$ ) | Methylbutylketone ( $\text{NO}^{+} 130$ ) | Nitromethane ( $\text{H}_3\text{O}^{+} 62$ ) | Pyridine ( $\text{H}_3\text{O}^{+} 80$ ) | Tetralin ( $\text{NO}^{+} 132$ ) | Tetralin ( $\text{O}_2^{+} 104$ ) | Trichloroethylene ( $\text{O}_2^{+} 130$ ) | Trichloroethylene ( $\text{O}_2^{+} 132$ ) |
|-----------------|---------------------------------------------|------------------------------------|------------------------------------|-----------------------------------------------------|--------------------------------------------|-------------------------------|-------------------------------------------|----------------------------------------------|------------------------------------------|----------------------------------|-----------------------------------|--------------------------------------------|--------------------------------------------|
| <b>50</b>       | Repl. 1                                     | 62.3                               | 77.8                               | 75.5                                                | 97.9                                       | 81.9                          | 90.5                                      | 111.4                                        | 67.8                                     | 76.0                             | 78.0                              | 83.9                                       | 69.3                                       |
|                 | Repl. 2                                     | 60.8                               | 75.8                               | 81.5                                                | 86.3                                       | 80.9                          | 90.5                                      | 103.9                                        | 81.1                                     | 77.9                             | 81.0                              | 81.4                                       | 70.0                                       |
|                 | Repl. 3                                     | 58.2                               | 74.9                               | 78.2                                                | 80.6                                       | 86.6                          | 88.6                                      | 93.0                                         | 84.6                                     | 76.7                             | 75.8                              | 79.7                                       | 68.0                                       |
|                 | <b>Mean</b>                                 | <b>60.4</b>                        | <b>76.2</b>                        | <b>78.4</b>                                         | <b>88.2</b>                                | <b>83.1</b>                   | <b>89.9</b>                               | <b>102.7</b>                                 | <b>77.9</b>                              | <b>76.9</b>                      | <b>78.2</b>                       | <b>81.7</b>                                | <b>69.1</b>                                |
|                 | <b>SD</b>                                   | <b>1.7</b>                         | <b>1.2</b>                         | <b>2.4</b>                                          | <b>7.2</b>                                 | <b>2.5</b>                    | <b>0.90</b>                               | <b>7.5</b>                                   | <b>7.2</b>                               | <b>0.76</b>                      | <b>2.1</b>                        | <b>1.7</b>                                 | <b>0.82</b>                                |
|                 | <b>%RSD</b>                                 | <b>2.8</b>                         | <b>1.6</b>                         | <b>3.1</b>                                          | <b>8.2</b>                                 | <b>3.0</b>                    | <b>1.0</b>                                | <b>7.3</b>                                   | <b>9.3</b>                               | <b>1.0</b>                       | <b>2.7</b>                        | <b>2.1</b>                                 | <b>1.2</b>                                 |
| <b>100</b>      | Repl. 1                                     | 78.7                               | 85.3                               | 90.0                                                | 80.7                                       | 93.4                          | 86.2                                      | 99.6                                         | 83.8                                     | 85.0                             | 83.2                              | 94.2                                       | 85.9                                       |
|                 | Repl. 2                                     | 72.9                               | 80.8                               | 88.1                                                | 84.4                                       | 85.1                          | 85.5                                      | 95.5                                         | 95.4                                     | 80.6                             | 80.9                              | 90.7                                       | 81.9                                       |
|                 | Repl. 3                                     | 69.3                               | 82.0                               | 85.9                                                | 83.8                                       | 85.0                          | 86.2                                      | 90.8                                         | 94.1                                     | 83.3                             | 83.3                              | 92.6                                       | 83.3                                       |
|                 | <b>Mean</b>                                 | <b>73.6</b>                        | <b>82.7</b>                        | <b>88.0</b>                                         | <b>83.0</b>                                | <b>87.9</b>                   | <b>86.0</b>                               | <b>95.3</b>                                  | <b>91.1</b>                              | <b>83.0</b>                      | <b>82.5</b>                       | <b>92.5</b>                                | <b>83.7</b>                                |
|                 | <b>SD</b>                                   | <b>3.9</b>                         | <b>1.9</b>                         | <b>1.7</b>                                          | <b>1.6</b>                                 | <b>3.9</b>                    | <b>0.35</b>                               | <b>3.6</b>                                   | <b>5.2</b>                               | <b>1.8</b>                       | <b>1.1</b>                        | <b>1.4</b>                                 | <b>1.6</b>                                 |
|                 | <b>%RSD</b>                                 | <b>5.3</b>                         | <b>2.3</b>                         | <b>1.9</b>                                          | <b>2.0</b>                                 | <b>4.5</b>                    | <b>0.41</b>                               | <b>3.8</b>                                   | <b>5.7</b>                               | <b>2.2</b>                       | <b>1.3</b>                        | <b>1.6</b>                                 | <b>2.0</b>                                 |

**Table S20b.** SIFT-MS recovery data for Class 2B solvents (Run 2) in the tableted product. All data are percentages.

| <b>Spike Level / %</b> | <b>Replicate Number and Statistical Parameters</b> | <b>Chloroform (O<sub>2</sub><sup>+</sup> 83)</b> | <b>Chloroform (O<sub>2</sub><sup>+</sup> 85)</b> | <b>1,2-Dimethoxyethane (H<sub>3</sub>O<sup>+</sup> 91)</b> | <b>1,2-Dimethoxyethane (NO<sup>+</sup> 89)</b> | <b>Hexane (NO<sup>+</sup> 85)</b> | <b>Methylbutylketone (NO<sup>+</sup> 130)</b> | <b>Nitromethane (H<sub>3</sub>O<sup>+</sup> 62)</b> | <b>Pyridine (H<sub>3</sub>O<sup>+</sup> 80)</b> | <b>Tetralin (NO<sup>+</sup> 132)</b> | <b>Tetralin (O<sub>2</sub><sup>+</sup> 104)</b> | <b>Trichloroethylene (O<sub>2</sub><sup>+</sup> 130)</b> | <b>Trichloroethylene (O<sub>2</sub><sup>+</sup> 132)</b> |
|------------------------|----------------------------------------------------|--------------------------------------------------|--------------------------------------------------|------------------------------------------------------------|------------------------------------------------|-----------------------------------|-----------------------------------------------|-----------------------------------------------------|-------------------------------------------------|--------------------------------------|-------------------------------------------------|----------------------------------------------------------|----------------------------------------------------------|
| <b>50</b>              | Repl. 1                                            | 87.4                                             | 93.2                                             | 87.2                                                       | 97.1                                           | 95.5                              | 98.6                                          | 101.1                                               | 78.2                                            | 92.0                                 | 94.2                                            | 91.4                                                     | 86.0                                                     |
|                        | Repl. 2                                            | 67.5                                             | 74.9                                             | 72.8                                                       | 75.1                                           | 74.0                              | 82.1                                          | 77.6                                                | 73.3                                            | 73.6                                 | 73.9                                            | 71.5                                                     | 65.6                                                     |
|                        | Repl. 3                                            | 89.4                                             | 102.8                                            | 99.0                                                       | 107.5                                          | 100.1                             | 110.4                                         | 116.1                                               | 92.2                                            | 101.2                                | 98.7                                            | 99.7                                                     | 90.9                                                     |
|                        | <b>Mean</b>                                        | <b>81.4</b>                                      | <b>90.3</b>                                      | <b>86.3</b>                                                | <b>93.2</b>                                    | <b>89.9</b>                       | <b>97.0</b>                                   | <b>98.2</b>                                         | <b>81.3</b>                                     | <b>88.9</b>                          | <b>88.9</b>                                     | <b>87.5</b>                                              | <b>80.8</b>                                              |
|                        | <b>SD</b>                                          | <b>9.9</b>                                       | <b>11.6</b>                                      | <b>10.7</b>                                                | <b>13.5</b>                                    | <b>11.4</b>                       | <b>11.6</b>                                   | <b>15.9</b>                                         | <b>8.0</b>                                      | <b>11.5</b>                          | <b>10.8</b>                                     | <b>11.8</b>                                              | <b>11.0</b>                                              |
|                        | <b>%RSD</b>                                        | <b>12.1</b>                                      | <b>12.8</b>                                      | <b>12.4</b>                                                | <b>14.5</b>                                    | <b>12.7</b>                       | <b>12.0</b>                                   | <b>16.1</b>                                         | <b>9.8</b>                                      | <b>12.9</b>                          | <b>12.1</b>                                     | <b>13.5</b>                                              | <b>13.6</b>                                              |
| <b>100</b>             | Repl. 1                                            | 108.7                                            | 86.8                                             | 93.2                                                       | 83.0                                           | 86.8                              | 83.5                                          | 86.8                                                | 81.7                                            | 94.4                                 | 92.2                                            | 107.5                                                    | 97.2                                                     |
|                        | Repl. 2                                            | 110.9                                            | 93.1                                             | 99.6                                                       | 90.1                                           | 95.2                              | 90.6                                          | 88.1                                                | 97.2                                            | 99.6                                 | 98.0                                            | 106.6                                                    | 102.4                                                    |
|                        | Repl. 3                                            | 108.4                                            | 90.8                                             | 93.7                                                       | 89.8                                           | 96.3                              | 87.1                                          | 88.1                                                | 94.3                                            | 96.3                                 | 96.4                                            | 106.6                                                    | 101.5                                                    |
|                        | <b>Mean</b>                                        | <b>109.3</b>                                     | <b>90.3</b>                                      | <b>95.5</b>                                                | <b>87.7</b>                                    | <b>92.8</b>                       | <b>87.1</b>                                   | <b>87.6</b>                                         | <b>91.1</b>                                     | <b>96.8</b>                          | <b>95.5</b>                                     | <b>106.9</b>                                             | <b>100.4</b>                                             |
|                        | <b>SD</b>                                          | <b>1.1</b>                                       | <b>2.6</b>                                       | <b>2.9</b>                                                 | <b>3.3</b>                                     | <b>4.2</b>                        | <b>2.9</b>                                    | <b>0.62</b>                                         | <b>6.7</b>                                      | <b>2.2</b>                           | <b>2.5</b>                                      | <b>0.41</b>                                              | <b>2.3</b>                                               |
|                        | <b>%RSD</b>                                        | <b>1.0</b>                                       | <b>2.9</b>                                       | <b>3.0</b>                                                 | <b>3.7</b>                                     | <b>4.5</b>                        | <b>3.3</b>                                    | <b>0.70</b>                                         | <b>7.4</b>                                      | <b>2.2</b>                           | <b>2.6</b>                                      | <b>0.38</b>                                              | <b>2.3</b>                                               |

**Table S21a.** GC-FID recovery data for Class 2A solvents (Run 1) in the tableted product. All data are percentages. Values in red do not meet acceptance criteria ( $\pm 20\%$  of spiked value).

| Spike Level / % | Replicate Number and Statistical Parameters | Acetonitrile | Chlorobenzene | Cumene      | Cyclohexane | 1,2-Dichloroethene | 1,4-Dioxane | Methanol    | Methylcyclohexane | Methylene chloride | Tetrahydrofuran | Toluene     | Xylene      |
|-----------------|---------------------------------------------|--------------|---------------|-------------|-------------|--------------------|-------------|-------------|-------------------|--------------------|-----------------|-------------|-------------|
| <b>50</b>       | Repl. 1                                     | 87.0         | 89.2          | 74.5        | 71.3        | 98.3               | 81.6        | 81.6        | 57.5              | 94.4               | 94.0            | 92.9        | 86.7        |
|                 | Repl. 2                                     | 72.7         | 89.5          | 75.2        | 70.8        | 96.0               | 94.6        | 91.9        | 58.8              | 93.9               | 94.8            | 93.2        | 86.9        |
|                 | Repl. 3                                     | 100.8        | 85.5          | 66.0        | 53.8        | 81.7               | 98.1        | 107.5       | 44.0              | 91.2               | 86.9            | 84.2        | 80.0        |
|                 | <b>Mean</b>                                 | <b>86.8</b>  | <b>88.0</b>   | <b>71.9</b> | <b>65.3</b> | <b>92.0</b>        | <b>91.4</b> | <b>93.7</b> | <b>53.4</b>       | <b>93.1</b>        | <b>91.9</b>     | <b>90.1</b> | <b>84.5</b> |
|                 | <b>SD</b>                                   | <b>11.5</b>  | <b>1.8</b>    | <b>4.2</b>  | <b>8.2</b>  | <b>7.3</b>         | <b>7.1</b>  | <b>10.7</b> | <b>6.7</b>        | <b>1.4</b>         | <b>3.5</b>      | <b>4.2</b>  | <b>3.9</b>  |
|                 | <b>%RSD</b>                                 | <b>13.2</b>  | <b>2.1</b>    | <b>5.9</b>  | <b>12.5</b> | <b>8.0</b>         | <b>7.8</b>  | <b>11.4</b> | <b>12.5</b>       | <b>1.5</b>         | <b>3.8</b>      | <b>4.6</b>  | <b>4.7</b>  |
| <b>100</b>      | Repl. 1                                     | 101.4        | 91.9          | 70.8        | 73.0        | 100.2              | 97.9        | 100.9       | 58.9              | 98.9               | 99.2            | 94.5        | 86.0        |
|                 | Repl. 2                                     | 96.4         | 88.7          | 64.6        | 65.2        | 94.6               | 91.5        | 94.0        | 49.8              | 92.1               | 94.5            | 90.4        | 81.5        |
|                 | Repl. 3                                     | 88.4         | 92.0          | 74.4        | 75.9        | 98.7               | 98.7        | 99.8        | 64.4              | 97.4               | 97.4            | 94.2        | 86.8        |
|                 | <b>Mean</b>                                 | <b>95.4</b>  | <b>90.9</b>   | <b>69.9</b> | <b>71.4</b> | <b>97.8</b>        | <b>96.0</b> | <b>98.2</b> | <b>57.7</b>       | <b>96.1</b>        | <b>97.0</b>     | <b>93.0</b> | <b>84.8</b> |
|                 | <b>SD</b>                                   | <b>5.3</b>   | <b>1.5</b>    | <b>4.1</b>  | <b>4.5</b>  | <b>2.4</b>         | <b>3.2</b>  | <b>3.0</b>  | <b>6.0</b>        | <b>2.9</b>         | <b>1.9</b>      | <b>1.9</b>  | <b>2.8</b>  |
|                 | <b>%RSD</b>                                 | <b>5.6</b>   | <b>1.7</b>    | <b>5.8</b>  | <b>6.3</b>  | <b>2.4</b>         | <b>3.3</b>  | <b>3.1</b>  | <b>10.5</b>       | <b>3.0</b>         | <b>2.0</b>      | <b>2.0</b>  | <b>3.3</b>  |

**Table S21b.** GC-FID recovery data for Class 2A solvents (Run 2) in the tableted product. All data are percentages. Values in red do not meet acceptance criteria ( $\pm 20\%$  of spiked value), while values in gray are outliers and are not included in calculations.

| Spike Level / % | Replicate Number and Statistical Parameters | Acetonitrile | Chlorobenzene | Cumene      | Cyclohexane  | 1,2-Dichloroethene | 1,4-Dioxane | Methanol    | Methylcyclohexane | Methylene chloride | Tetrahydrofuran | Toluene      | Xylene      |
|-----------------|---------------------------------------------|--------------|---------------|-------------|--------------|--------------------|-------------|-------------|-------------------|--------------------|-----------------|--------------|-------------|
| <b>50</b>       | Repl. 1                                     | 97.0         | 95.3          | 77.8        | 79.9         | 98.5               | 87.6        | 91.3        | 63.4              | 99.1               | 97.7            | 96.7         | 90.8        |
|                 | Repl. 2                                     | 108.4        | 98.6          | 94.2        | 84.0         | 93.9               | 92.6        | 90.0        | 80.4              | 100.9              | 98.1            | 97.0         | 97.5        |
|                 | Repl. 3                                     | 105.8        | 95.7          | 94.9        | 90.8         | 94.3               | 99.3        | 110.1       | 88.7              | 97.3               | 95.4            | 96.3         | 97.0        |
|                 | <b>Mean</b>                                 | <b>103.8</b> | <b>96.5</b>   | <b>88.9</b> | <b>84.9</b>  | <b>95.6</b>        | <b>93.2</b> | <b>97.1</b> | <b>77.5</b>       | <b>99.1</b>        | <b>97.1</b>     | <b>96.7</b>  | <b>95.1</b> |
|                 | <b>SD</b>                                   | <b>6.0</b>   | <b>1.8</b>    | <b>9.7</b>  | <b>5.5</b>   | <b>2.6</b>         | <b>5.9</b>  | <b>11.2</b> | <b>12.9</b>       | <b>1.8</b>         | <b>1.4</b>      | <b>0.4</b>   | <b>3.7</b>  |
|                 | <b>%RSD</b>                                 | <b>5.8</b>   | <b>1.9</b>    | <b>10.9</b> | <b>6.4</b>   | <b>2.7</b>         | <b>6.3</b>  | <b>11.6</b> | <b>16.7</b>       | <b>1.8</b>         | <b>1.5</b>      | <b>0.4</b>   | <b>3.9</b>  |
| <b>100</b>      | Repl. 1                                     | 78.5         | 94.7          | 94.5        | 100.4        | 101.7              | 73.5        | 74.0        | 96.3              | 93.2               | 96.9            | 98.9         | 95.9        |
|                 | Repl. 2                                     | 81.3         | 97.8          | 98.6        | 104.6        | 103.5              | 70.4        | 74.9        | 101.6             | 95.5               | 98.1            | 101.3        | 99.2        |
|                 | Repl. 3                                     | 47.8         | 63.1          | 67.8        | 70.4         | 67.9               | 39.9        | 42.9        | 70.4              | 61.8               | 64.7            | 65.9         | 65.5        |
|                 | <b>Mean</b>                                 | <b>79.9</b>  | <b>96.3</b>   | <b>96.6</b> | <b>102.5</b> | <b>102.6</b>       | <b>71.9</b> | <b>74.4</b> | <b>98.9</b>       | <b>94.4</b>        | <b>97.5</b>     | <b>100.1</b> | <b>97.6</b> |
|                 | <b>SD</b>                                   | <b>2.0</b>   | <b>2.2</b>    | <b>2.9</b>  | <b>3.0</b>   | <b>1.3</b>         | <b>2.2</b>  | <b>0.6</b>  | <b>3.8</b>        | <b>1.6</b>         | <b>0.9</b>      | <b>1.7</b>   | <b>2.3</b>  |
|                 | <b>%RSD</b>                                 | <b>2.5</b>   | <b>2.3</b>    | <b>3.0</b>  | <b>2.9</b>   | <b>1.2</b>         | <b>3.0</b>  | <b>0.9</b>  | <b>3.8</b>        | <b>1.7</b>         | <b>0.9</b>      | <b>1.7</b>   | <b>2.4</b>  |

**Table S22a.** GC-FID recovery data for Class 2B solvents (Run 1) in the tableted product. All data are percentages. Values in red do not meet acceptance criteria ( $\pm 20\%$  of spiked value).

| Spike Level / % | Replicate Number and Statistical Parameters | Chloroform  | 1,2-Dimethoxyethane | Hexane      | Methylbutylketone | Nitromethane | Pyridine    | Tetralin    | Trichloroethylene |
|-----------------|---------------------------------------------|-------------|---------------------|-------------|-------------------|--------------|-------------|-------------|-------------------|
| <b>50</b>       | Repl. 1                                     | 87.9        | 207.1               | 83.9        | 86.6              | 94.5         | 52.3        | 88.6        | 91.1              |
|                 | Repl. 2                                     | 89.7        | 178.9               | 79.5        | 88.2              | 82.6         | 64.3        | 88.3        | 86.1              |
|                 | Repl. 3                                     | 97.5        | 106.9               | 61.9        | 94.8              | 62.5         | 77.5        | 87.7        | 77.3              |
|                 | <b>Mean</b>                                 | <b>91.7</b> | <b>164.3</b>        | <b>75.1</b> | <b>89.8</b>       | <b>79.8</b>  | <b>64.7</b> | <b>88.2</b> | <b>84.8</b>       |
|                 | <b>SD</b>                                   | <b>4.2</b>  | <b>42.2</b>         | <b>9.5</b>  | <b>3.5</b>        | <b>13.2</b>  | <b>10.3</b> | <b>0.4</b>  | <b>5.7</b>        |
|                 | <b>%RSD</b>                                 | <b>4.6</b>  | <b>25.7</b>         | <b>12.7</b> | <b>3.9</b>        | <b>16.5</b>  | <b>15.9</b> | <b>0.4</b>  | <b>6.7</b>        |
| <b>100</b>      | Repl. 1                                     | 97.8        | 114.5               | 89.6        | 93.9              | 92.3         | 95.8        | 93.8        | 102.0             |
|                 | Repl. 2                                     | 92.2        | 91.2                | 79.4        | 91.7              | 80.3         | 84.3        | 88.1        | 92.8              |
|                 | Repl. 3                                     | 97.0        | 95.3                | 83.4        | 93.5              | 86.0         | 95.2        | 90.3        | 95.9              |
|                 | <b>Mean</b>                                 | <b>95.7</b> | <b>100.3</b>        | <b>84.1</b> | <b>93.0</b>       | <b>86.2</b>  | <b>91.8</b> | <b>90.7</b> | <b>96.9</b>       |
|                 | <b>SD</b>                                   | <b>2.5</b>  | <b>10.2</b>         | <b>4.2</b>  | <b>1.0</b>        | <b>4.9</b>   | <b>5.3</b>  | <b>2.3</b>  | <b>3.8</b>        |
|                 | <b>%RSD</b>                                 | <b>2.6</b>  | <b>10.1</b>         | <b>5.0</b>  | <b>1.0</b>        | <b>5.7</b>   | <b>5.8</b>  | <b>2.6</b>  | <b>3.9</b>        |

**Table S22b.** GC-FID recovery data for Class 2B solvents (Run 2) in the tableted product. All data are percentages. Values in red do not meet acceptance criteria ( $\pm 20\%$  of spiked value), while values in gray are outliers and are not included in calculations.

| Spike Level / % | Replicate Number and Statistical Parameters | Chloroform   | 1,2-Dimethoxyethane | Hexane       | Methylbutylketone | Nitromethane | Pyridine     | Tetralin    | Trichloroethylene |
|-----------------|---------------------------------------------|--------------|---------------------|--------------|-------------------|--------------|--------------|-------------|-------------------|
| <b>50</b>       | Repl. 1                                     | 95.8         | 156.3               | 96.5         | 95.1              | 97.2         | 119.3        | 98.6        | 90.7              |
|                 | Repl. 2                                     | 108.2        | 136.8               | 86.5         | 105.9             | 89.5         | 133.2        | 103.7       | 91.9              |
|                 | Repl. 3                                     | 99.9         | 140.8               | 89.5         | 93.8              | 81.5         | 121.9        | 95.8        | 93.3              |
|                 | <b>Mean</b>                                 | <b>101.3</b> | <b>144.6</b>        | <b>90.8</b>  | <b>98.3</b>       | <b>89.4</b>  | <b>124.8</b> | <b>99.4</b> | <b>92.0</b>       |
|                 | <b>SD</b>                                   | <b>6.3</b>   | <b>10.3</b>         | <b>5.2</b>   | <b>6.6</b>        | <b>7.9</b>   | <b>7.4</b>   | <b>4.0</b>  | <b>1.3</b>        |
|                 | <b>%RSD</b>                                 | <b>6.2</b>   | <b>7.1</b>          | <b>5.7</b>   | <b>6.8</b>        | <b>8.8</b>   | <b>5.9</b>   | <b>4.0</b>  | <b>1.4</b>        |
| <b>100</b>      | Repl. 1                                     | 79.5         | 79.8                | 108.2        | 82.8              | 101.1        | 102.6        | 92.4        | 101.7             |
|                 | Repl. 2                                     | 84.3         | 87.3                | 107.6        | 85.9              | 104.9        | 106.5        | 94.0        | 101.8             |
|                 | Repl. 3                                     | 51.9         | 79.7                | 70.6         | 52.6              | 69.7         | 67.9         | 61.2        | 65.9              |
|                 | <b>Mean</b>                                 | <b>81.9</b>  | <b>83.6</b>         | <b>107.9</b> | <b>84.4</b>       | <b>103.0</b> | <b>104.6</b> | <b>93.2</b> | <b>101.7</b>      |
|                 | <b>SD</b>                                   | <b>3.4</b>   | <b>5.4</b>          | <b>0.4</b>   | <b>2.3</b>        | <b>2.7</b>   | <b>2.8</b>   | <b>1.1</b>  | <b>0.1</b>        |
|                 | <b>%RSD</b>                                 | <b>4.2</b>   | <b>6.4</b>          | <b>0.4</b>   | <b>2.7</b>        | <b>2.6</b>   | <b>2.7</b>   | <b>1.2</b>  | <b>0.1</b>        |



## E.2. Oral suspension

**Table S23a.** SIFT-MS recovery data for Class 2A solvents (Run 1) in the oral suspension product. All data are percentages. Values in red do not meet acceptance criteria ( $\pm 20\%$  of spiked value).

| Spike Level / % | Replicate Number and Statistical Parameters | Acetonitrile (H <sub>3</sub> O <sup>+</sup> 42) | Chlorobenzene (O <sub>2</sub> <sup>+</sup> 112) | Chlorobenzene (O <sub>2</sub> <sup>+</sup> 114) | Cumene (NO <sup>+</sup> 120) | Cyclohexane (NO <sup>+</sup> 83) | Cyclohexane (O <sub>2</sub> <sup>+</sup> 84) | 1,2-Dichloroethene (H <sub>3</sub> O <sup>+</sup> 99) | 1,2-Dichloroethene (O <sub>2</sub> <sup>+</sup> 96) | 1,2-Dichloroethene (O <sub>2</sub> <sup>+</sup> 98) | 1,4-Dioxane (H <sub>3</sub> O <sup>+</sup> 89) | 1,4-Dioxane (NO <sup>+</sup> 87) | 1,4-Dioxane (NO <sup>+</sup> 88) | Methanol (H <sub>3</sub> O <sup>+</sup> 33) | Methylcyclohexane (NO <sup>+</sup> 97) | Methylene chloride (O <sub>2</sub> <sup>+</sup> 84) | Methylene chloride (O <sub>2</sub> <sup>+</sup> 86) | Tetrahydrofuran (NO <sup>+</sup> 71) | Toluene (NO <sup>+</sup> 92) | Toluene (O <sub>2</sub> <sup>+</sup> 92) | Xylene (NO <sup>+</sup> 106) |
|-----------------|---------------------------------------------|-------------------------------------------------|-------------------------------------------------|-------------------------------------------------|------------------------------|----------------------------------|----------------------------------------------|-------------------------------------------------------|-----------------------------------------------------|-----------------------------------------------------|------------------------------------------------|----------------------------------|----------------------------------|---------------------------------------------|----------------------------------------|-----------------------------------------------------|-----------------------------------------------------|--------------------------------------|------------------------------|------------------------------------------|------------------------------|
| <b>50</b>       | Repl. 1                                     | 93.1                                            | 74.9                                            | 74.9                                            | 70.9                         | 66.4                             | 69.1                                         | 73.1                                                  | 83.2                                                | 75.4                                                | 1369.2                                         | 110.4                            | 150.2                            | 91.4                                        | 57.6                                   | 66.0                                                | 87.8                                                | 129.8                                | 86.8                         | 75.4                                     | 76.5                         |
|                 | Repl. 2                                     | 112.5                                           | 88.7                                            | 87.2                                            | 77.2                         | 70.8                             | 72.7                                         | 83.9                                                  | 92.6                                                | 83.6                                                | 1851.5                                         | 142.0                            | 213.7                            | 114.3                                       | 59.3                                   | 69.7                                                | 100.9                                               | 161.2                                | 96.4                         | 85.5                                     | 85.0                         |
|                 | Repl. 3                                     | 73.7                                            | 65.4                                            | 65.0                                            | 57.6                         | 56.7                             | 61.3                                         | 67.7                                                  | 73.8                                                | 67.7                                                | 1223.1                                         | 99.9                             | 134.7                            | 75.1                                        | 47.5                                   | 58.3                                                | 75.8                                                | 109.0                                | 72.5                         | 64.9                                     | 64.2                         |
|                 | <b>Mean</b>                                 | <b>93.1</b>                                     | <b>76.3</b>                                     | <b>75.7</b>                                     | <b>68.6</b>                  | <b>64.6</b>                      | <b>67.7</b>                                  | <b>74.9</b>                                           | <b>83.2</b>                                         | <b>75.6</b>                                         | <b>1481.3</b>                                  | <b>117.4</b>                     | <b>166.2</b>                     | <b>93.6</b>                                 | <b>54.8</b>                            | <b>64.7</b>                                         | <b>88.2</b>                                         | <b>133.3</b>                         | <b>85.2</b>                  | <b>75.3</b>                              | <b>75.2</b>                  |
|                 | <b>SD</b>                                   | <b>15.9</b>                                     | <b>9.6</b>                                      | <b>9.1</b>                                      | <b>8.2</b>                   | <b>5.9</b>                       | <b>4.7</b>                                   | <b>6.7</b>                                            | <b>7.7</b>                                          | <b>6.5</b>                                          | <b>268.5</b>                                   | <b>17.9</b>                      | <b>34.2</b>                      | <b>16.1</b>                                 | <b>5.2</b>                             | <b>4.8</b>                                          | <b>10.3</b>                                         | <b>21.5</b>                          | <b>9.8</b>                   | <b>8.4</b>                               | <b>8.5</b>                   |
|                 | <b>%RSD</b>                                 | <b>17.0</b>                                     | <b>12.5</b>                                     | <b>12.0</b>                                     | <b>11.9</b>                  | <b>9.2</b>                       | <b>7.0</b>                                   | <b>9.0</b>                                            | <b>9.2</b>                                          | <b>8.6</b>                                          | <b>18.1</b>                                    | <b>15.2</b>                      | <b>20.6</b>                      | <b>17.2</b>                                 | <b>9.6</b>                             | <b>7.3</b>                                          | <b>11.6</b>                                         | <b>16.1</b>                          | <b>11.5</b>                  | <b>11.2</b>                              | <b>11.4</b>                  |
| <b>100</b>      | Repl. 1                                     | 105.6                                           | 91.6                                            | 90.8                                            | 81.9                         | 78.4                             | 78.1                                         | 84.2                                                  | 97.6                                                | 90.6                                                | 902.0                                          | 120.8                            | 143.4                            | 107.0                                       | 67.5                                   | 76.8                                                | 93.9                                                | 125.5                                | 95.0                         | 92.3                                     | 90.5                         |
|                 | Repl. 2                                     | 102.1                                           | 89.9                                            | 90.8                                            | 82.4                         | 79.1                             | 77.8                                         | 85.0                                                  | 96.9                                                | 88.9                                                | 842.5                                          | 124.9                            | 134.9                            | 104.8                                       | 68.9                                   | 76.5                                                | 93.0                                                | 121.7                                | 97.6                         | 93.4                                     | 88.9                         |
|                 | Repl. 3                                     | 98.6                                            | 88.2                                            | 86.4                                            | 82.4                         | 79.1                             | 78.6                                         | 88.3                                                  | 95.1                                                | 87.7                                                | 854.4                                          | 116.9                            | 143.4                            | 101.8                                       | 71.2                                   | 77.4                                                | 91.4                                                | 116.4                                | 93.8                         | 92.3                                     | 88.3                         |
|                 | <b>Mean</b>                                 | <b>102.1</b>                                    | <b>89.9</b>                                     | <b>89.4</b>                                     | <b>82.3</b>                  | <b>78.8</b>                      | <b>78.2</b>                                  | <b>85.9</b>                                           | <b>96.6</b>                                         | <b>89.0</b>                                         | <b>866.3</b>                                   | <b>120.8</b>                     | <b>140.6</b>                     | <b>104.5</b>                                | <b>69.2</b>                            | <b>76.9</b>                                         | <b>92.8</b>                                         | <b>121.2</b>                         | <b>95.5</b>                  | <b>92.6</b>                              | <b>89.2</b>                  |
|                 | <b>SD</b>                                   | <b>2.9</b>                                      | <b>1.4</b>                                      | <b>2.1</b>                                      | <b>0.25</b>                  | <b>0.31</b>                      | <b>0.3</b>                                   | <b>1.8</b>                                            | <b>1.1</b>                                          | <b>1.2</b>                                          | <b>25.7</b>                                    | <b>3.3</b>                       | <b>4.0</b>                       | <b>2.1</b>                                  | <b>1.5</b>                             | <b>0.39</b>                                         | <b>1.0</b>                                          | <b>3.7</b>                           | <b>1.6</b>                   | <b>0.55</b>                              | <b>0.93</b>                  |
|                 | <b>%RSD</b>                                 | <b>2.8</b>                                      | <b>1.5</b>                                      | <b>2.3</b>                                      | <b>0.30</b>                  | <b>0.40</b>                      | <b>0.4</b>                                   | <b>2.1</b>                                            | <b>1.1</b>                                          | <b>1.3</b>                                          | <b>3.0</b>                                     | <b>2.7</b>                       | <b>2.9</b>                       | <b>2.0</b>                                  | <b>2.2</b>                             | <b>0.50</b>                                         | <b>1.1</b>                                          | <b>3.1</b>                           | <b>1.7</b>                   | <b>0.59</b>                              | <b>1.0</b>                   |

**Table S23b.** SIFT-MS recovery data for Class 2A solvents (Run 2) in the oral suspension product. All data are percentages. Values in red do not meet acceptance criteria ( $\pm 20\%$  of spiked value).

| Spike Level / % | Replicate Number and Statistical Parameters | Acetonitrile ( $\text{H}_3\text{O}^+ 42$ ) | Chlorobenzene ( $\text{O}_2^+ 112$ ) | Chlorobenzene ( $\text{O}_2^+ 114$ ) | Cumene ( $\text{NO}^+ 120$ ) | Cyclohexane ( $\text{NO}^+ 83$ ) | Cyclohexane ( $\text{O}_2^+ 84$ ) | 1,2-Dichloroethene ( $\text{H}_3\text{O}^+ 99$ ) | 1,2-Dichloroethene ( $\text{O}_2^+ 96$ ) | 1,2-Dichloroethene ( $\text{O}_2^+ 98$ ) | 1,4-Dioxane ( $\text{H}_3\text{O}^+ 89$ ) | 1,4-Dioxane ( $\text{NO}^+ 87$ ) | 1,4-Dioxane ( $\text{NO}^+ 88$ ) | Methanol ( $\text{H}_3\text{O}^+ 33$ ) | Methylcyclohexane ( $\text{NO}^+ 97$ ) | Methylene chloride ( $\text{O}_2^+ 84$ ) | Methylene chloride ( $\text{O}_2^+ 86$ ) | Tetrahydrofuran ( $\text{NO}^+ 71$ ) | Toluene ( $\text{NO}^+ 92$ ) | Toluene ( $\text{O}_2^+ 92$ ) | Xylene ( $\text{NO}^+ 106$ ) |
|-----------------|---------------------------------------------|--------------------------------------------|--------------------------------------|--------------------------------------|------------------------------|----------------------------------|-----------------------------------|--------------------------------------------------|------------------------------------------|------------------------------------------|-------------------------------------------|----------------------------------|----------------------------------|----------------------------------------|----------------------------------------|------------------------------------------|------------------------------------------|--------------------------------------|------------------------------|-------------------------------|------------------------------|
| <b>50</b>       | Repl. 1                                     | 107.3                                      | 95.6                                 | 97.5                                 | 94.7                         | 96.9                             | 101.0                             | 113.4                                            | 99.9                                     | 98.6                                     | 209.7                                     | 107.7                            | 99.5                             | 100.2                                  | 92.7                                   | 98.0                                     | 100.3                                    | 103.0                                | 99.5                         | 93.1                          | 94.8                         |
|                 | Repl. 2                                     | 107.3                                      | 91.9                                 | 93.6                                 | 90.1                         | 94.5                             | 98.2                              | 109.4                                            | 99.1                                     | 96.8                                     | 194.3                                     | 95.0                             | 105.7                            | 101.0                                  | 87.6                                   | 95.6                                     | 97.1                                     | 97.5                                 | 99.8                         | 92.8                          | 90.1                         |
|                 | Repl. 3                                     | 106.5                                      | 90.7                                 | 94.9                                 | 87.7                         | 96.9                             | 95.3                              | 115.5                                            | 95.9                                     | 95.0                                     | 196.9                                     | 102.1                            | 104.6                            | 96.3                                   | 84.7                                   | 93.1                                     | 95.8                                     | 96.4                                 | 96.7                         | 89.7                          | 88.6                         |
|                 | <b>Mean</b>                                 | <b>107.0</b>                               | <b>92.8</b>                          | <b>95.3</b>                          | <b>90.8</b>                  | <b>96.1</b>                      | <b>98.2</b>                       | <b>112.8</b>                                     | <b>98.3</b>                              | <b>96.8</b>                              | <b>200.3</b>                              | <b>101.6</b>                     | <b>103.3</b>                     | <b>99.1</b>                            | <b>88.3</b>                            | <b>95.6</b>                              | <b>97.7</b>                              | <b>99.0</b>                          | <b>98.7</b>                  | <b>91.9</b>                   | <b>91.2</b>                  |
|                 | <b>SD</b>                                   | <b>0.36</b>                                | <b>2.1</b>                           | <b>1.6</b>                           | <b>2.9</b>                   | <b>1.2</b>                       | <b>2.3</b>                        | <b>2.5</b>                                       | <b>1.7</b>                               | <b>1.5</b>                               | <b>6.7</b>                                | <b>5.2</b>                       | <b>2.7</b>                       | <b>2.1</b>                             | <b>3.3</b>                             | <b>2.0</b>                               | <b>1.9</b>                               | <b>2.9</b>                           | <b>1.4</b>                   | <b>1.5</b>                    | <b>2.6</b>                   |
|                 | <b>%RSD</b>                                 | <b>0.33</b>                                | <b>2.2</b>                           | <b>1.7</b>                           | <b>3.2</b>                   | <b>1.2</b>                       | <b>2.4</b>                        | <b>2.2</b>                                       | <b>1.7</b>                               | <b>1.6</b>                               | <b>3.4</b>                                | <b>5.1</b>                       | <b>2.6</b>                       | <b>2.1</b>                             | <b>3.7</b>                             | <b>2.1</b>                               | <b>1.9</b>                               | <b>2.9</b>                           | <b>1.4</b>                   | <b>1.7</b>                    | <b>2.9</b>                   |
| <b>100</b>      | Repl. 1                                     | 101.5                                      | 106.7                                | 106.9                                | 107.8                        | 110.1                            | 110.9                             | 111.6                                            | 107.0                                    | 108.8                                    | 147.1                                     | 98.7                             | 95.2                             | 96.4                                   | 110.7                                  | 111.2                                    | 104.1                                    | 100.5                                | 106.5                        | 108.6                         | 106.2                        |
|                 | Repl. 2                                     | 88.3                                       | 98.4                                 | 97.5                                 | 103.4                        | 112.6                            | 111.4                             | 114.9                                            | 100.3                                    | 102.3                                    | 126.1                                     | 86.7                             | 83.3                             | 81.1                                   | 112.2                                  | 111.2                                    | 91.8                                     | 85.2                                 | 101.4                        | 101.1                         | 100.2                        |
|                 | Repl. 3                                     | 93.2                                       | 99.9                                 | 102.0                                | 102.7                        | 113.8                            | 109.5                             | 113.8                                            | 102.2                                    | 103.6                                    | 135.1                                     | 97.3                             | 89.0                             | 87.2                                   | 111.0                                  | 109.1                                    | 97.1                                     | 91.0                                 | 102.0                        | 102.4                         | 102.4                        |
|                 | <b>Mean</b>                                 | <b>94.3</b>                                | <b>101.7</b>                         | <b>102.1</b>                         | <b>104.6</b>                 | <b>112.2</b>                     | <b>110.6</b>                      | <b>113.4</b>                                     | <b>103.2</b>                             | <b>104.9</b>                             | <b>136.1</b>                              | <b>94.3</b>                      | <b>89.2</b>                      | <b>88.3</b>                            | <b>111.3</b>                           | <b>110.5</b>                             | <b>97.7</b>                              | <b>92.2</b>                          | <b>103.3</b>                 | <b>104.0</b>                  | <b>103.0</b>                 |
|                 | <b>SD</b>                                   | <b>5.4</b>                                 | <b>3.6</b>                           | <b>3.8</b>                           | <b>2.2</b>                   | <b>1.5</b>                       | <b>0.80</b>                       | <b>1.4</b>                                       | <b>2.8</b>                               | <b>2.8</b>                               | <b>8.6</b>                                | <b>5.3</b>                       | <b>4.9</b>                       | <b>6.3</b>                             | <b>0.61</b>                            | <b>1.0</b>                               | <b>5.1</b>                               | <b>6.3</b>                           | <b>2.3</b>                   | <b>3.3</b>                    | <b>2.5</b>                   |
|                 | <b>%RSD</b>                                 | <b>5.8</b>                                 | <b>3.5</b>                           | <b>3.7</b>                           | <b>2.1</b>                   | <b>1.4</b>                       | <b>0.73</b>                       | <b>1.2</b>                                       | <b>2.7</b>                               | <b>2.7</b>                               | <b>6.3</b>                                | <b>5.7</b>                       | <b>5.4</b>                       | <b>7.1</b>                             | <b>0.55</b>                            | <b>0.87</b>                              | <b>5.2</b>                               | <b>6.8</b>                           | <b>2.2</b>                   | <b>3.1</b>                    | <b>2.4</b>                   |

**Table S24a.** SIFT-MS recovery data for Class 2B solvents (Run 1) in the oral suspension product. All data are percentages. Values in red do not meet acceptance criteria ( $\pm 20\%$  of spiked value).

| Spike Level / % | Replicate Number and Statistical Parameters | Chloroform (O <sub>2</sub> <sup>+</sup> 83) | Chloroform (O <sub>2</sub> <sup>+</sup> 85) | 1,2-Dimethoxyethane (H <sub>3</sub> O <sup>+</sup> 91) | 1,2-Dimethoxyethane (NO <sup>+</sup> 89) | Hexane (NO <sup>+</sup> 85) | Methylbutylketone (NO <sup>+</sup> 130) | Nitromethane (H <sub>3</sub> O <sup>+</sup> 62) | Pyridine (H <sub>3</sub> O <sup>+</sup> 80) | Tetralin (NO <sup>+</sup> 132) | Tetralin (O <sub>2</sub> <sup>+</sup> 104) | Trichloroethylene (O <sub>2</sub> <sup>+</sup> 130) | Trichloroethylene (O <sub>2</sub> <sup>+</sup> 132) |
|-----------------|---------------------------------------------|---------------------------------------------|---------------------------------------------|--------------------------------------------------------|------------------------------------------|-----------------------------|-----------------------------------------|-------------------------------------------------|---------------------------------------------|--------------------------------|--------------------------------------------|-----------------------------------------------------|-----------------------------------------------------|
| <b>50</b>       | Repl. 1                                     | 56.8                                        | 90.1                                        | 80.9                                                   | 161.3                                    | 1836.6                      | 93.7                                    | 101.1                                           | 64.3                                        | 69.8                           | 72.1                                       | 96.3                                                | 62.3                                                |
|                 | Repl. 2                                     | 60.6                                        | 102.9                                       | 92.5                                                   | 200.0                                    | 2385.9                      | 112.1                                   | 108.0                                           | 81.5                                        | 81.6                           | 82.5                                       | 113.9                                               | 72.6                                                |
|                 | Repl. 3                                     | 49.1                                        | 77.4                                        | 62.5                                                   | 120.4                                    | 1622.1                      | 72.7                                    | 79.4                                            | 99.0                                        | 55.2                           | 60.8                                       | 81.3                                                | 51.7                                                |
|                 | <b>Mean</b>                                 | <b>55.5</b>                                 | <b>90.1</b>                                 | <b>78.6</b>                                            | <b>160.6</b>                             | <b>1948.2</b>               | <b>92.8</b>                             | <b>96.2</b>                                     | <b>81.6</b>                                 | <b>68.9</b>                    | <b>71.8</b>                                | <b>97.2</b>                                         | <b>62.2</b>                                         |
|                 | <b>SD</b>                                   | <b>4.8</b>                                  | <b>10.4</b>                                 | <b>12.3</b>                                            | <b>32.5</b>                              | <b>321.6</b>                | <b>16.1</b>                             | <b>12.2</b>                                     | <b>14.2</b>                                 | <b>10.8</b>                    | <b>8.9</b>                                 | <b>13.3</b>                                         | <b>8.6</b>                                          |
|                 | <b>%RSD</b>                                 | <b>8.6</b>                                  | <b>11.5</b>                                 | <b>15.7</b>                                            | <b>20.2</b>                              | <b>16.5</b>                 | <b>17.3</b>                             | <b>12.7</b>                                     | <b>17.3</b>                                 | <b>15.7</b>                    | <b>12.4</b>                                | <b>13.7</b>                                         | <b>13.8</b>                                         |
| <b>100</b>      | Repl. 1                                     | 73.4                                        | 94.6                                        | 90.2                                                   | 144.1                                    | 1061.2                      | 100.2                                   | 100.3                                           | 79.6                                        | 79.2                           | 78.9                                       | 106.8                                               | 80.9                                                |
|                 | Repl. 2                                     | 72.8                                        | 92.9                                        | 89.9                                                   | 140.4                                    | 995.4                       | 96.2                                    | 95.9                                            | 85.4                                        | 76.4                           | 80.1                                       | 106.8                                               | 80.9                                                |
|                 | Repl. 3                                     | 74.3                                        | 91.5                                        | 88.0                                                   | 139.8                                    | 1033.0                      | 87.1                                    | 86.7                                            | 81.5                                        | 71.9                           | 73.3                                       | 99.2                                                | 76.0                                                |
|                 | <b>Mean</b>                                 | <b>73.5</b>                                 | <b>93.0</b>                                 | <b>89.3</b>                                            | <b>141.5</b>                             | <b>1029.9</b>               | <b>94.5</b>                             | <b>94.3</b>                                     | <b>82.2</b>                                 | <b>75.9</b>                    | <b>77.5</b>                                | <b>104.3</b>                                        | <b>79.3</b>                                         |
|                 | <b>SD</b>                                   | <b>0.6</b>                                  | <b>1.3</b>                                  | <b>1.0</b>                                             | <b>1.9</b>                               | <b>27.0</b>                 | <b>5.5</b>                              | <b>5.7</b>                                      | <b>2.4</b>                                  | <b>3.0</b>                     | <b>3.0</b>                                 | <b>3.6</b>                                          | <b>2.3</b>                                          |
|                 | <b>%RSD</b>                                 | <b>0.86</b>                                 | <b>1.4</b>                                  | <b>1.1</b>                                             | <b>1.4</b>                               | <b>2.6</b>                  | <b>5.8</b>                              | <b>6.0</b>                                      | <b>2.9</b>                                  | <b>4.0</b>                     | <b>3.9</b>                                 | <b>3.4</b>                                          | <b>2.9</b>                                          |

**Table S24b.** SIFT-MS recovery data for Class 2B solvents (Run 2) in the oral suspension product. All data are percentages. Values in red do not meet acceptance criteria ( $\pm 20\%$  of spiked value).

| <b>Spike Level / %</b> | <b>Replicate Number and Statistical Parameters</b> | <b>Chloroform (O<sub>2</sub><sup>+</sup> 83)</b> | <b>Chloroform (O<sub>2</sub><sup>+</sup> 85)</b> | <b>1,2-Dimethoxyethane (H<sub>3</sub>O<sup>+</sup> 91)</b> | <b>1,2-Dimethoxyethane (NO<sup>+</sup> 89)</b> | <b>Hexane (NO<sup>+</sup> 85)</b> | <b>Methylbutylketone (NO<sup>+</sup> 130)</b> | <b>Nitromethane (H<sub>3</sub>O<sup>+</sup> 62)</b> | <b>Pyridine (H<sub>3</sub>O<sup>+</sup> 80)</b> | <b>Tetralin (NO<sup>+</sup> 132)</b> | <b>Tetralin (O<sub>2</sub><sup>+</sup> 104)</b> | <b>Trichloroethylene (O<sub>2</sub><sup>+</sup> 130)</b> | <b>Trichloroethylene (O<sub>2</sub><sup>+</sup> 132)</b> |
|------------------------|----------------------------------------------------|--------------------------------------------------|--------------------------------------------------|------------------------------------------------------------|------------------------------------------------|-----------------------------------|-----------------------------------------------|-----------------------------------------------------|-------------------------------------------------|--------------------------------------|-------------------------------------------------|----------------------------------------------------------|----------------------------------------------------------|
| <b>50</b>              | Repl. 1                                            | 91.1                                             | 99.0                                             | 94.6                                                       | 99.7                                           | 130.3                             | 103.9                                         | 105.0                                               | 78.9                                            | 95.5                                 | 96.9                                            | 98.5                                                     | 86.6                                                     |
|                        | Repl. 2                                            | 87.4                                             | 95.4                                             | 91.6                                                       | 99.1                                           | 122.7                             | 102.5                                         | 93.2                                                | 94.3                                            | 93.6                                 | 93.5                                            | 95.7                                                     | 86.6                                                     |
|                        | Repl. 3                                            | 85.9                                             | 94.5                                             | 91.3                                                       | 96.5                                           | 123.1                             | 98.0                                          | 94.5                                                | 85.2                                            | 91.2                                 | 91.3                                            | 95.6                                                     | 84.1                                                     |
|                        | <b>Mean</b>                                        | <b>88.1</b>                                      | <b>96.3</b>                                      | <b>92.5</b>                                                | <b>98.4</b>                                    | <b>125.4</b>                      | <b>101.5</b>                                  | <b>97.6</b>                                         | <b>86.1</b>                                     | <b>93.4</b>                          | <b>93.9</b>                                     | <b>96.6</b>                                              | <b>85.8</b>                                              |
|                        | <b>SD</b>                                          | <b>2.2</b>                                       | <b>1.9</b>                                       | <b>1.5</b>                                                 | <b>1.4</b>                                     | <b>3.5</b>                        | <b>2.5</b>                                    | <b>5.3</b>                                          | <b>6.3</b>                                      | <b>1.8</b>                           | <b>2.3</b>                                      | <b>1.3</b>                                               | <b>1.2</b>                                               |
|                        | <b>%RSD</b>                                        | <b>2.5</b>                                       | <b>2.0</b>                                       | <b>1.6</b>                                                 | <b>1.4</b>                                     | <b>2.8</b>                        | <b>2.5</b>                                    | <b>5.4</b>                                          | <b>7.3</b>                                      | <b>1.9</b>                           | <b>2.5</b>                                      | <b>1.4</b>                                               | <b>1.4</b>                                               |
| <b>100</b>             | Repl. 1                                            | 111.3                                            | 103.3                                            | 106.1                                                      | 102.9                                          | 111.2                             | 98.3                                          | 95.3                                                | 104.2                                           | 104.1                                | 104.2                                           | 112.6                                                    | 107.4                                                    |
|                        | Repl. 2                                            | 110.3                                            | 89.7                                             | 94.9                                                       | 91.2                                           | 105.7                             | 84.2                                          | 82.9                                                | 97.1                                            | 93.2                                 | 96.1                                            | 107.5                                                    | 98.7                                                     |
|                        | Repl. 3                                            | 108.8                                            | 95.4                                             | 98.1                                                       | 95.9                                           | 110.6                             | 91.2                                          | 87.4                                                | 101.1                                           | 98.4                                 | 97.7                                            | 108.3                                                    | 102.1                                                    |
|                        | <b>Mean</b>                                        | <b>110.1</b>                                     | <b>96.1</b>                                      | <b>99.7</b>                                                | <b>96.6</b>                                    | <b>109.2</b>                      | <b>91.2</b>                                   | <b>88.5</b>                                         | <b>100.8</b>                                    | <b>98.6</b>                          | <b>99.4</b>                                     | <b>109.5</b>                                             | <b>102.7</b>                                             |
|                        | <b>SD</b>                                          | <b>1.0</b>                                       | <b>5.6</b>                                       | <b>4.7</b>                                                 | <b>4.8</b>                                     | <b>2.5</b>                        | <b>5.7</b>                                    | <b>5.1</b>                                          | <b>2.9</b>                                      | <b>4.5</b>                           | <b>3.5</b>                                      | <b>2.3</b>                                               | <b>3.6</b>                                               |
|                        | <b>%RSD</b>                                        | <b>0.91</b>                                      | <b>5.8</b>                                       | <b>4.8</b>                                                 | <b>5.0</b>                                     | <b>2.3</b>                        | <b>6.3</b>                                    | <b>5.8</b>                                          | <b>2.9</b>                                      | <b>4.5</b>                           | <b>3.5</b>                                      | <b>2.1</b>                                               | <b>3.5</b>                                               |

**Table S25a.** GC-FID recovery data for Class 2A solvents (Run 1) in the oral suspension product. All data are percentages. Values in red do not meet acceptance criteria ( $\pm 20\%$  of spiked value).

| Spike Level / % | Replicate Number and Statistical Parameters | Acetonitrile | Chlorobenzene | Cumene      | Cyclohexane | 1,2-Dichloroethene | 1,4-Dioxane | Methanol    | Methylcyclohexane | Methylene chloride | Tetrahydrofuran | Toluene     | Xylene      |
|-----------------|---------------------------------------------|--------------|---------------|-------------|-------------|--------------------|-------------|-------------|-------------------|--------------------|-----------------|-------------|-------------|
| <b>50</b>       | Repl. 1                                     | 101.8        | 90.2          | 73.8        | 70.4        | 98.1               | 96.3        | 91.9        | 57.8              | 95.1               | 95.2            | 93.0        | 92.8        |
|                 | Repl. 2                                     | 121.4        | 88.0          | 70.0        | 63.6        | 91.9               | 106.9       | 105.3       | 51.4              | 97.1               | 94.6            | 90.0        | 91.3        |
|                 | Repl. 3                                     | 99.5         | 86.3          | 72.9        | 69.7        | 96.0               | 91.0        | 91.1        | 57.5              | 94.2               | 94.2            | 92.0        | 91.0        |
|                 | <b>Mean</b>                                 | <b>107.6</b> | <b>88.2</b>   | <b>72.2</b> | <b>67.9</b> | <b>95.4</b>        | <b>98.1</b> | <b>96.1</b> | <b>55.5</b>       | <b>95.5</b>        | <b>94.7</b>     | <b>91.7</b> | <b>91.7</b> |
|                 | <b>SD</b>                                   | <b>9.8</b>   | <b>1.6</b>    | <b>1.6</b>  | <b>3.0</b>  | <b>2.6</b>         | <b>6.6</b>  | <b>6.5</b>  | <b>2.9</b>        | <b>1.2</b>         | <b>0.4</b>      | <b>1.2</b>  | <b>0.9</b>  |
|                 | <b>%RSD</b>                                 | <b>9.1</b>   | <b>1.8</b>    | <b>2.2</b>  | <b>4.5</b>  | <b>2.7</b>         | <b>6.7</b>  | <b>6.8</b>  | <b>5.3</b>        | <b>1.3</b>         | <b>0.4</b>      | <b>1.4</b>  | <b>1.0</b>  |
| <b>100</b>      | Repl. 1                                     | 100.7        | 87.0          | 72.7        | 75.8        | 98.5               | 100.6       | 96.0        | 64.3              | 95.4               | 94.7            | 92.1        | 87.1        |
|                 | Repl. 2                                     | 98.3         | 76.7          | 53.0        | 69.1        | 95.1               | 96.4        | 93.3        | 53.6              | 93.3               | 92.4            | 83.1        | 73.0        |
|                 | Repl. 3                                     | 103.4        | 88.3          | 69.7        | 73.7        | 97.9               | 99.4        | 99.5        | 60.2              | 95.7               | 96.2            | 92.1        | 86.8        |
|                 | <b>Mean</b>                                 | <b>100.8</b> | <b>84.0</b>   | <b>65.1</b> | <b>72.9</b> | <b>97.2</b>        | <b>98.8</b> | <b>96.3</b> | <b>59.4</b>       | <b>94.8</b>        | <b>94.4</b>     | <b>89.1</b> | <b>82.3</b> |
|                 | <b>SD</b>                                   | <b>2.1</b>   | <b>5.2</b>    | <b>8.7</b>  | <b>2.8</b>  | <b>1.5</b>         | <b>1.8</b>  | <b>2.5</b>  | <b>4.4</b>        | <b>1.1</b>         | <b>1.6</b>      | <b>4.2</b>  | <b>8.1</b>  |
|                 | <b>%RSD</b>                                 | <b>2.1</b>   | <b>6.2</b>    | <b>13.3</b> | <b>3.8</b>  | <b>1.5</b>         | <b>1.8</b>  | <b>2.6</b>  | <b>7.5</b>        | <b>1.1</b>         | <b>1.6</b>      | <b>4.7</b>  | <b>9.8</b>  |

**Table S25b.** GC-FID recovery data for Class 2A solvents (Run 2) in the oral suspension product. All data are percentages. Values in red do not meet acceptance criteria ( $\pm 20\%$  of spiked value), while values in gray are outliers and are not included in calculations.

| Spike Level / % | Replicate Number and Statistical Parameters | Acetonitrile | Chlorobenzene | Cumene      | Cyclohexane  | 1,2-Dichloroethene | 1,4-Dioxane | Methanol     | Methylcyclohexane | Methylene chloride | Tetrahydrofuran | Toluene     | Xylene      |
|-----------------|---------------------------------------------|--------------|---------------|-------------|--------------|--------------------|-------------|--------------|-------------------|--------------------|-----------------|-------------|-------------|
| <b>50</b>       | Repl. 1                                     | 73.0         | 54.5          | 35.9        | 49.9         | 59.1               | 65.0        | 52.2         | 43.3              | 56.0               | 30.2            | 56.7        | 52.1        |
|                 | Repl. 2                                     | 103.7        | 90.4          | 87.7        | 88.4         | 96.1               | 99.9        | 100.9        | 79.4              | 94.8               | 95.5            | 95.6        | 94.1        |
|                 | Repl. 3                                     | 94.7         | 91.6          | 91.3        | 92.7         | 94.6               | 92.3        | 99.8         | 88.5              | 93.3               | 92.3            | 94.3        | 94.3        |
|                 | <b>Mean</b>                                 | <b>99.2</b>  | <b>91.0</b>   | <b>89.5</b> | <b>90.5</b>  | <b>95.3</b>        | <b>96.1</b> | <b>100.4</b> | <b>84.0</b>       | <b>94.1</b>        | <b>93.9</b>     | <b>94.9</b> | <b>94.2</b> |
|                 | <b>SD</b>                                   | <b>6.3</b>   | <b>0.88</b>   | <b>2.6</b>  | <b>3.0</b>   | <b>1.1</b>         | <b>5.4</b>  | <b>0.7</b>   | <b>6.5</b>        | <b>1.1</b>         | <b>2.3</b>      | <b>0.9</b>  | <b>0.18</b> |
|                 | <b>%RSD</b>                                 | <b>6.4</b>   | <b>0.97</b>   | <b>2.9</b>  | <b>3.3</b>   | <b>1.2</b>         | <b>5.6</b>  | <b>0.7</b>   | <b>7.7</b>        | <b>1.1</b>         | <b>2.4</b>      | <b>0.9</b>  | <b>0.20</b> |
| <b>100</b>      | Repl. 1                                     | 74.1         | 95.7          | 97.9        | 107.9        | 103.0              | 69.9        | 68.9         | 105.9             | 93.0               | 97.5            | 99.8        | 97.9        |
|                 | Repl. 2                                     | 82.4         | 93.3          | 99.5        | 108.0        | 100.9              | 79.9        | 77.5         | 108.4             | 92.5               | 96.2            | 98.9        | 97.8        |
|                 | Repl. 3                                     | 81.5         | 94.9          | 99.7        | 107.8        | 101.5              | 81.9        | 85.0         | 107.5             | 91.8               | 96.3            | 98.8        | 97.6        |
|                 | <b>Mean</b>                                 | <b>79.3</b>  | <b>94.6</b>   | <b>99.1</b> | <b>107.9</b> | <b>101.8</b>       | <b>77.2</b> | <b>77.1</b>  | <b>107.2</b>      | <b>92.4</b>        | <b>96.7</b>     | <b>99.2</b> | <b>97.8</b> |
|                 | <b>SD</b>                                   | <b>4.6</b>   | <b>1.26</b>   | <b>1.0</b>  | <b>0.1</b>   | <b>1.1</b>         | <b>6.4</b>  | <b>8.1</b>   | <b>1.3</b>        | <b>0.6</b>         | <b>0.7</b>      | <b>0.6</b>  | <b>0.15</b> |
|                 | <b>%RSD</b>                                 | <b>5.8</b>   | <b>1.33</b>   | <b>1.0</b>  | <b>0.1</b>   | <b>1.1</b>         | <b>8.3</b>  | <b>10.5</b>  | <b>1.2</b>        | <b>0.7</b>         | <b>0.8</b>      | <b>0.6</b>  | <b>0.16</b> |

**Table S26a.** GC-FID recovery data for Class 2B solvents (Run 1) in the oral suspension product. All data are percentages. Values in red do not meet acceptance criteria ( $\pm 20\%$  of spiked value).

| Spike Level / % | Replicate Number and Statistical Parameters | Chloroform  | 1,2-Dimethoxyethane | Hexane      | Methylbutylketone | Nitromethane | Pyridine    | Tetralin    | Trichloroethylene |
|-----------------|---------------------------------------------|-------------|---------------------|-------------|-------------------|--------------|-------------|-------------|-------------------|
| <b>50</b>       | Repl. 1                                     | 92.6        | 185.0               | 81.5        | 79.6              | 88.3         | 62.8        | 86.0        | 90.4              |
|                 | Repl. 2                                     | 101.8       | 141.6               | 74.1        | 98.9              | 88.7         | 73.2        | 89.1        | 85.5              |
|                 | Repl. 3                                     | 91.7        | 168.0               | 79.8        | 84.8              | 86.0         | 65.5        | 83.6        | 91.2              |
|                 | <b>Mean</b>                                 | <b>95.4</b> | <b>164.9</b>        | <b>78.5</b> | <b>87.8</b>       | <b>87.7</b>  | <b>67.2</b> | <b>86.2</b> | <b>89.0</b>       |
|                 | <b>SD</b>                                   | <b>4.6</b>  | <b>17.9</b>         | <b>3.2</b>  | <b>8.2</b>        | <b>1.2</b>   | <b>4.4</b>  | <b>2.2</b>  | <b>2.5</b>        |
|                 | <b>%RSD</b>                                 | <b>4.8</b>  | <b>10.8</b>         | <b>4.1</b>  | <b>9.3</b>        | <b>1.3</b>   | <b>6.6</b>  | <b>2.6</b>  | <b>2.8</b>        |
| <b>100</b>      | Repl. 1                                     | 95.3        | 99.2                | 84.4        | 88.8              | 90.2         | 82.6        | 83.3        | 94.3              |
|                 | Repl. 2                                     | 92.1        | 76.0                | 80.6        | 84.7              | 85.3         | 77.8        | 63.5        | 86.4              |
|                 | Repl. 3                                     | 96.8        | 97.7                | 83.1        | 87.4              | 85.6         | 82.7        | 81.8        | 95.4              |
|                 | <b>Mean</b>                                 | <b>94.7</b> | <b>91.0</b>         | <b>82.7</b> | <b>87.0</b>       | <b>87.0</b>  | <b>81.1</b> | <b>76.2</b> | <b>92.0</b>       |
|                 | <b>SD</b>                                   | <b>2.0</b>  | <b>10.6</b>         | <b>1.6</b>  | <b>1.7</b>        | <b>2.3</b>   | <b>2.3</b>  | <b>9.0</b>  | <b>4.0</b>        |
|                 | <b>%RSD</b>                                 | <b>2.1</b>  | <b>11.6</b>         | <b>1.9</b>  | <b>2.0</b>        | <b>2.6</b>   | <b>2.9</b>  | <b>11.9</b> | <b>4.4</b>        |

**Table S26b.** GC-FID recovery data for Class 2B solvents (Run 2) in the oral suspension product. All data are percentages. Values in red do not meet acceptance criteria ( $\pm 20\%$  of spiked value), while values in gray are outliers and are not included in calculations.

| Spike Level / % | Replicate Number and Statistical Parameters | Chloroform  | 1,2-Dimethoxyethane | Hexane       | Methylbutylketone | Nitromethane | Pyridine     | Tetralin    | Trichloroethylene |
|-----------------|---------------------------------------------|-------------|---------------------|--------------|-------------------|--------------|--------------|-------------|-------------------|
| <b>50</b>       | Repl. 1                                     | 67.8        | 63.5                | 41.6         | 62.8              | 38.5         | 84.2         | 61.7        | 49.5              |
|                 | Repl. 2                                     | 89.4        | 87.2                | 96.8         | 89.6              | 101.4        | 114.7        | 93.8        | 94.7              |
|                 | Repl. 3                                     | 89.1        | 67.3                | 94.8         | 86.8              | 84.6         | 113.5        | 91.8        | 93.3              |
|                 | <b>Mean</b>                                 | <b>89.2</b> | <b>77.2</b>         | <b>95.8</b>  | <b>88.2</b>       | <b>93.0</b>  | <b>114.1</b> | <b>92.8</b> | <b>94.0</b>       |
|                 | <b>SD</b>                                   | <b>0.15</b> | <b>14.0</b>         | <b>1.4</b>   | <b>2.0</b>        | <b>11.9</b>  | <b>0.79</b>  | <b>1.4</b>  | <b>1.0</b>        |
|                 | <b>%RSD</b>                                 | <b>0.17</b> | <b>18.2</b>         | <b>1.5</b>   | <b>2.2</b>        | <b>12.8</b>  | <b>0.69</b>  | <b>1.5</b>  | <b>1.1</b>        |
| <b>100</b>      | Repl. 1                                     | 79.0        | 61.1                | 107.0        | 79.0              | 102.3        | 101.4        | 88.8        | 97.6              |
|                 | Repl. 2                                     | 79.6        | 74.9                | 106.2        | 78.3              | 101.1        | 101.6        | 89.5        | 97.7              |
|                 | Repl. 3                                     | 80.0        | 94.6                | 107.1        | 80.3              | 106.3        | 101.3        | 89.5        | 98.4              |
|                 | <b>Mean</b>                                 | <b>79.6</b> | <b>76.9</b>         | <b>106.8</b> | <b>79.2</b>       | <b>103.2</b> | <b>101.4</b> | <b>89.3</b> | <b>97.9</b>       |
|                 | <b>SD</b>                                   | <b>0.52</b> | <b>16.8</b>         | <b>0.45</b>  | <b>1.0</b>        | <b>2.7</b>   | <b>0.14</b>  | <b>0.45</b> | <b>0.45</b>       |
|                 | <b>%RSD</b>                                 | <b>0.65</b> | <b>21.9</b>         | <b>0.42</b>  | <b>1.3</b>        | <b>2.6</b>   | <b>0.13</b>  | <b>0.50</b> | <b>0.46</b>       |



## Figures

### A. Linearity

**Figure S1.** SIFT-MS linearity plots for Class 2A solvents across the concentration levels 0.2 to 1.0. SIFT-MS response is the headspace concentration in ppmV.

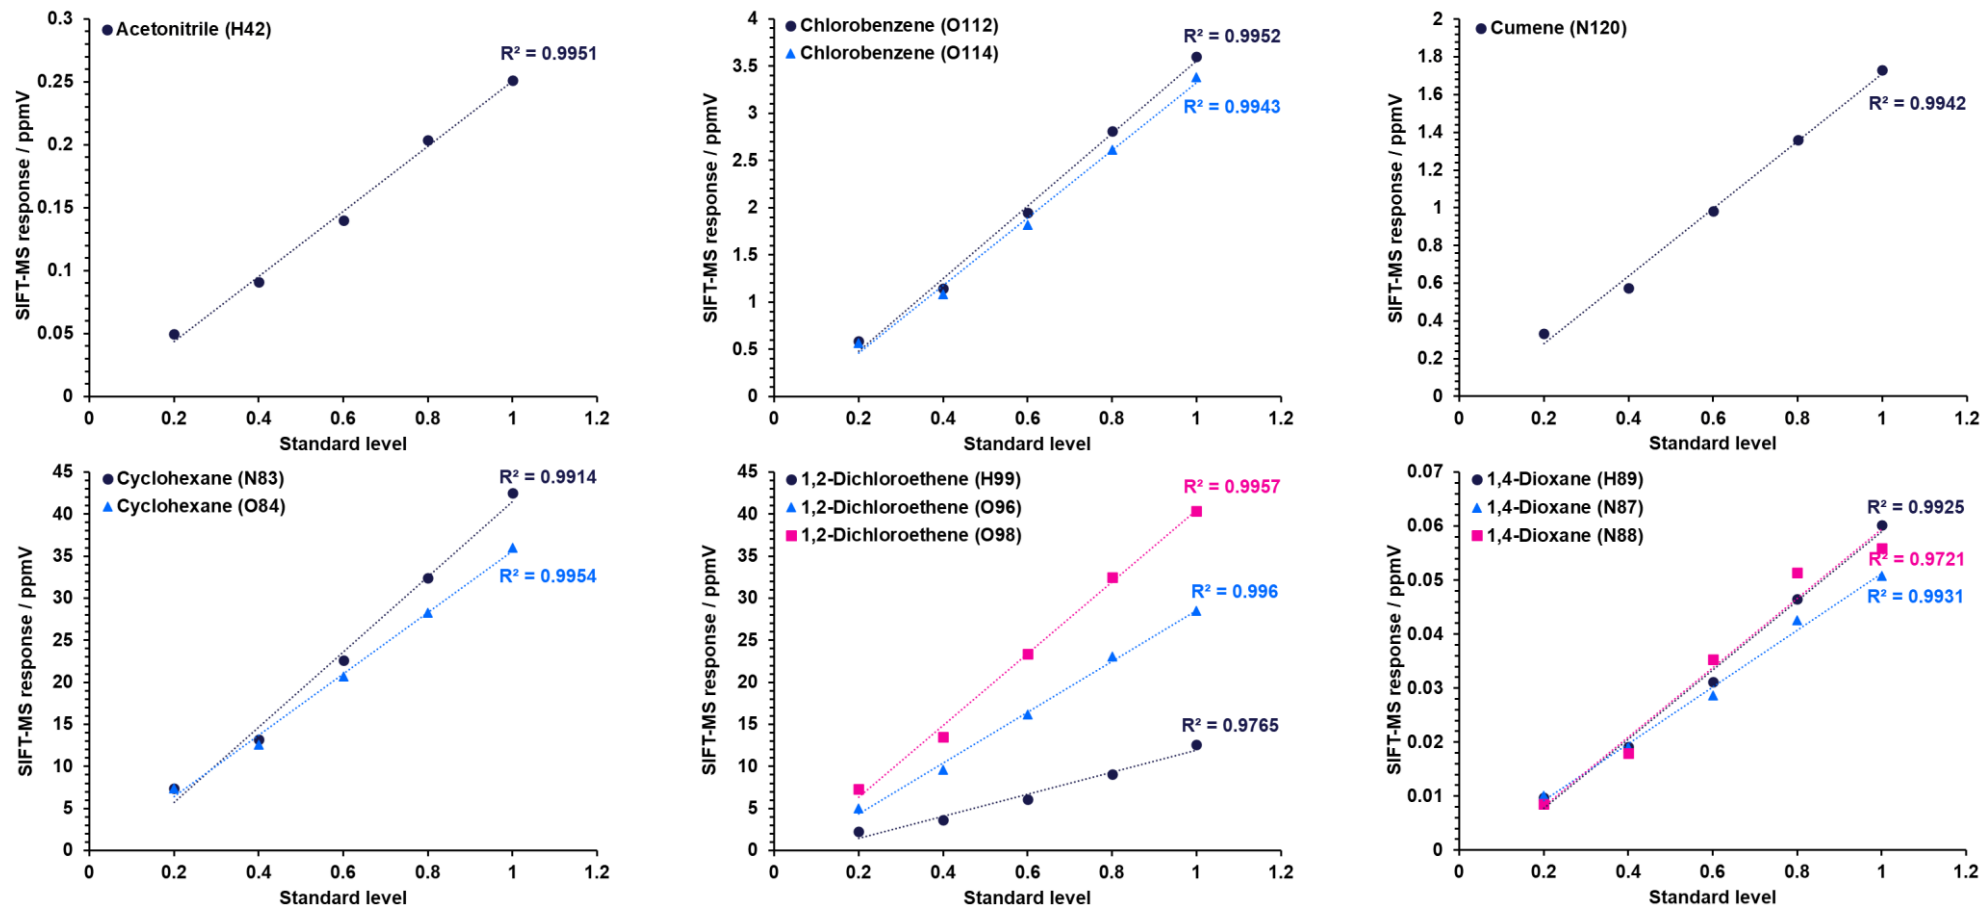

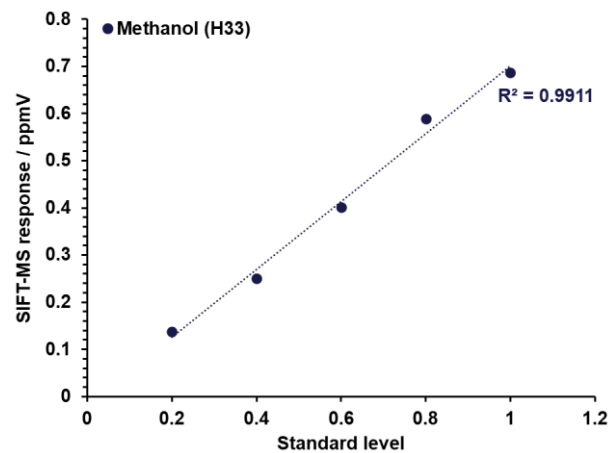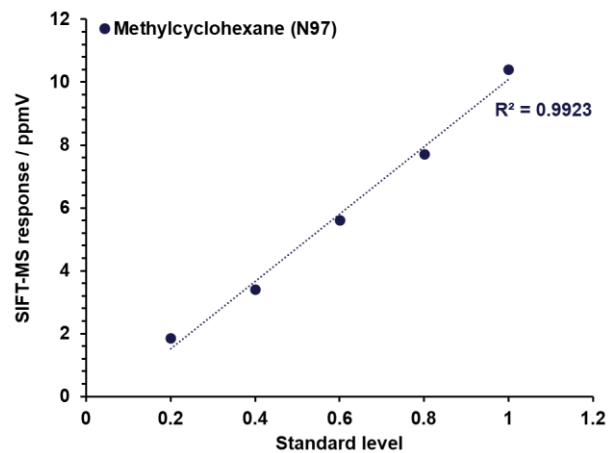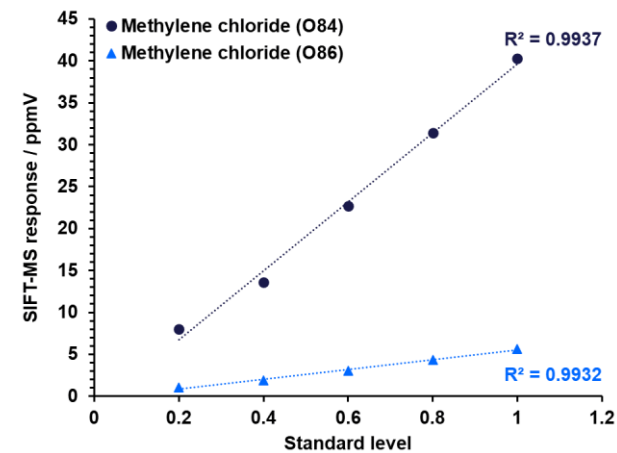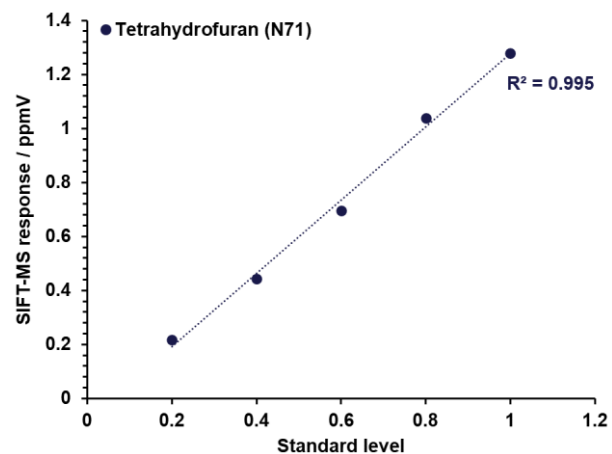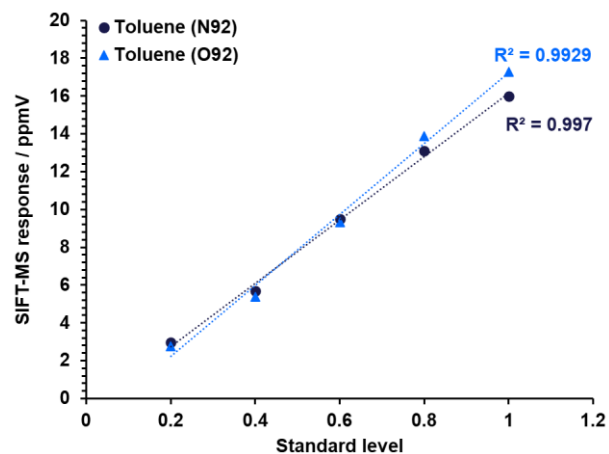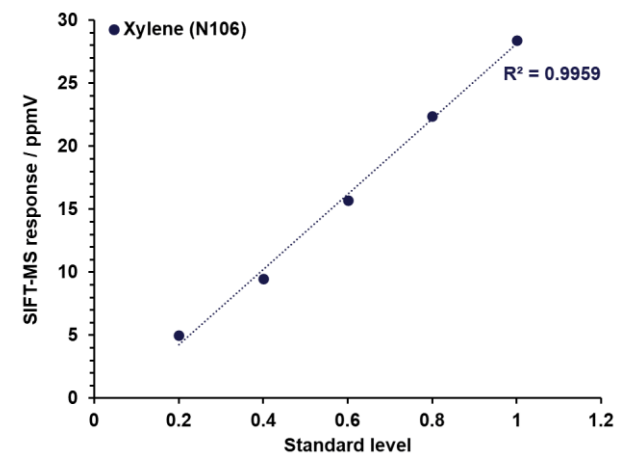

**Figure S2.** SIFT-MS linearity plots for Class 2B solvents across the concentration levels 0.2 to 1.0. SIFT-MS response is the headspace concentration in ppmV.

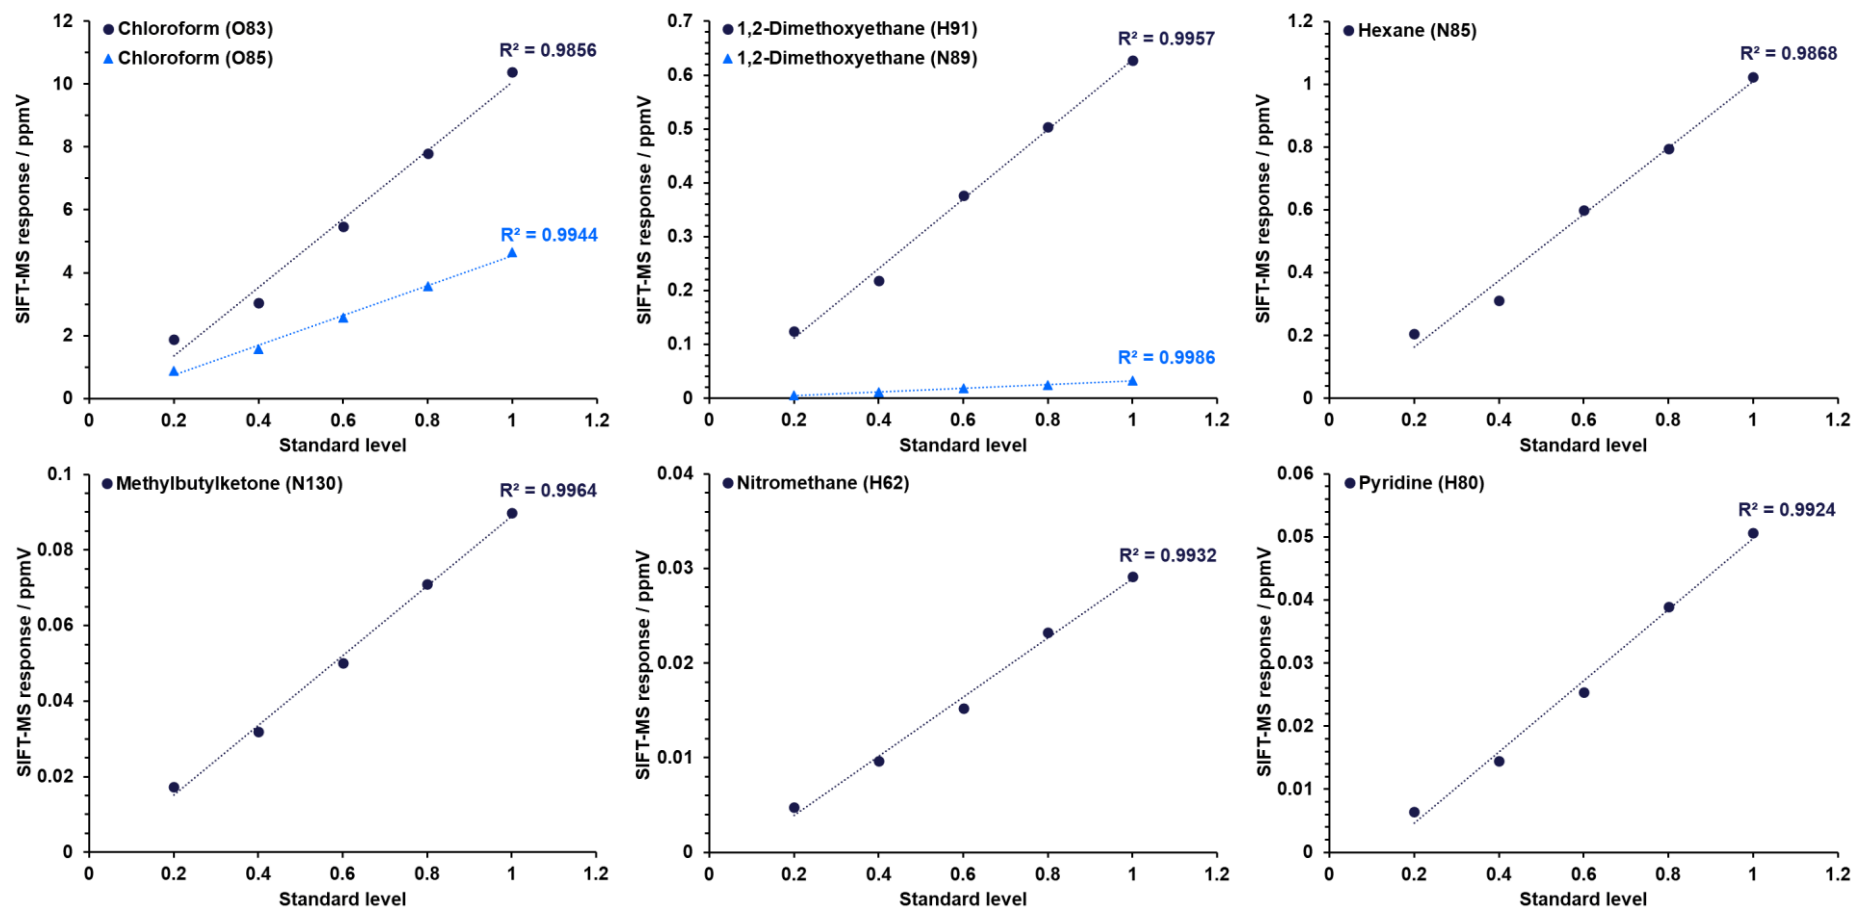

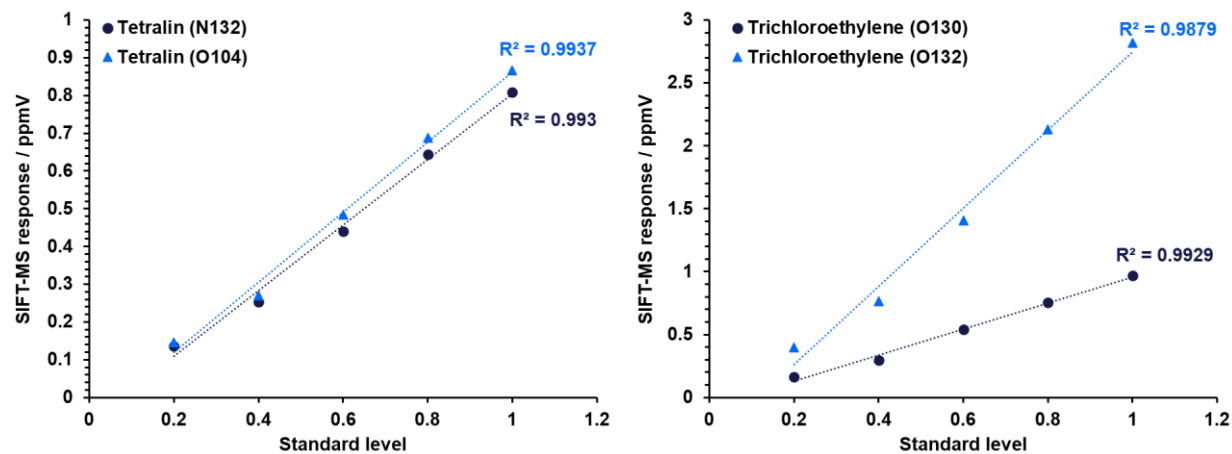

**Figure S3.** GC-FID linearity plots for Class 2A solvents across the concentration levels 0.2 to 1.0. GC-FID response is peak area. Note that for some analytes level 1.0 is not included as it significantly skewed the linear fit.

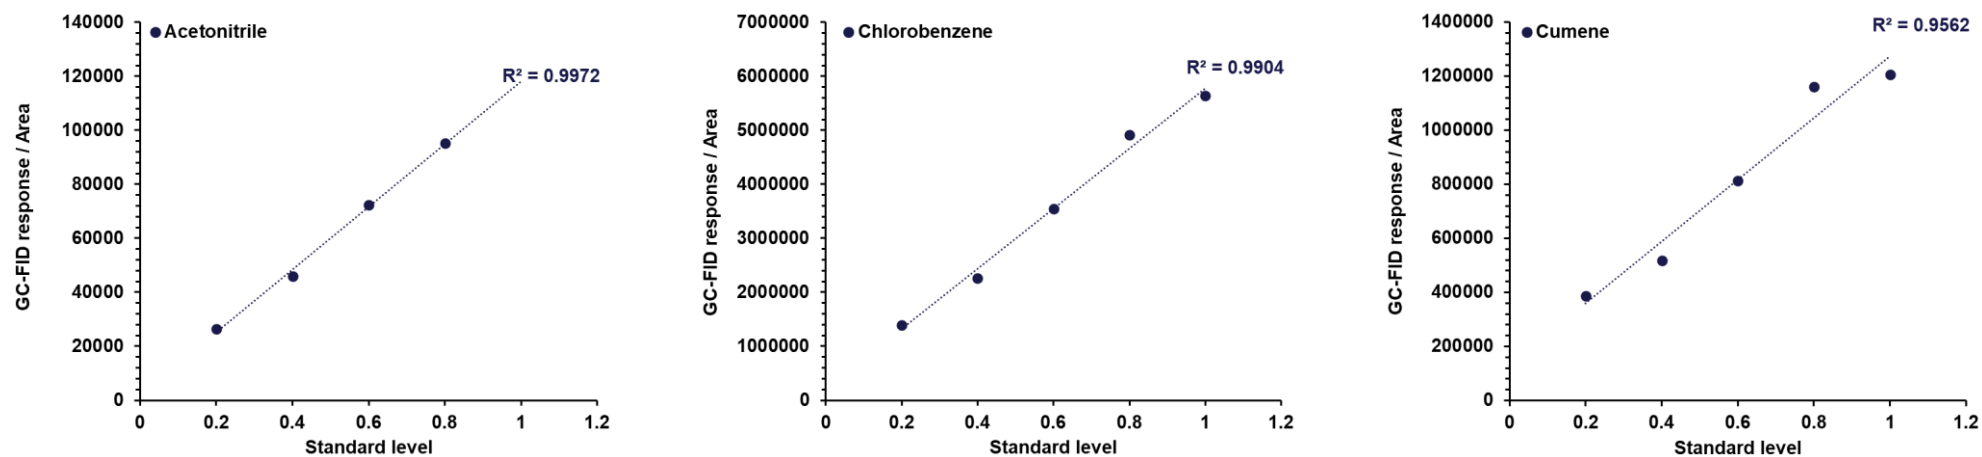

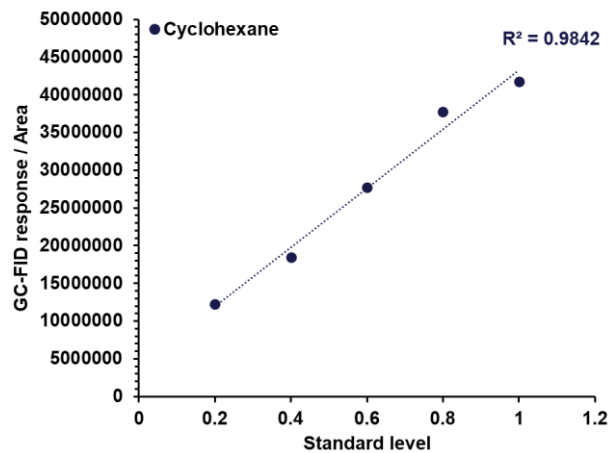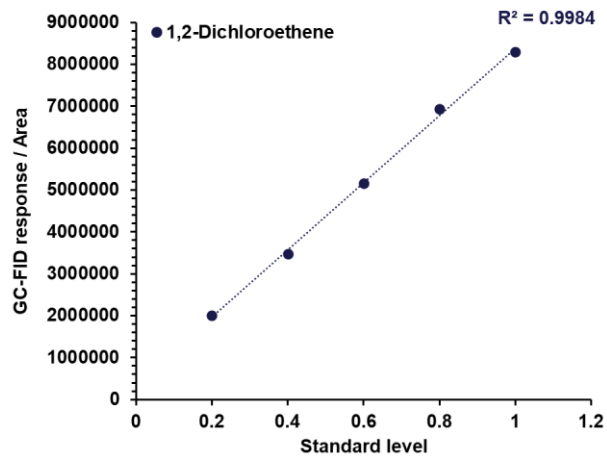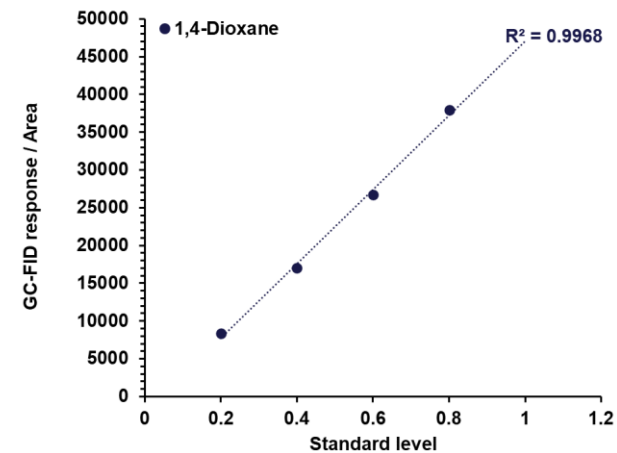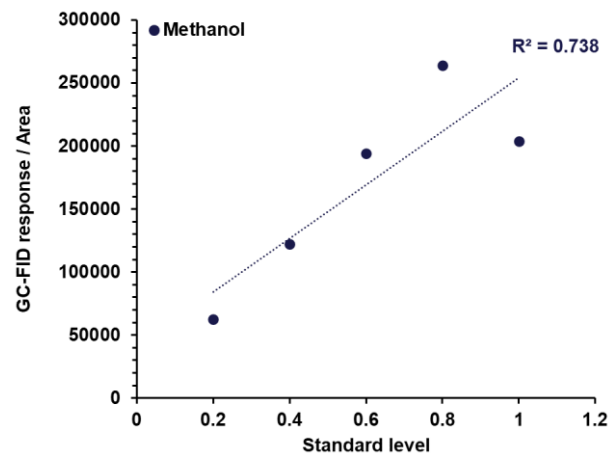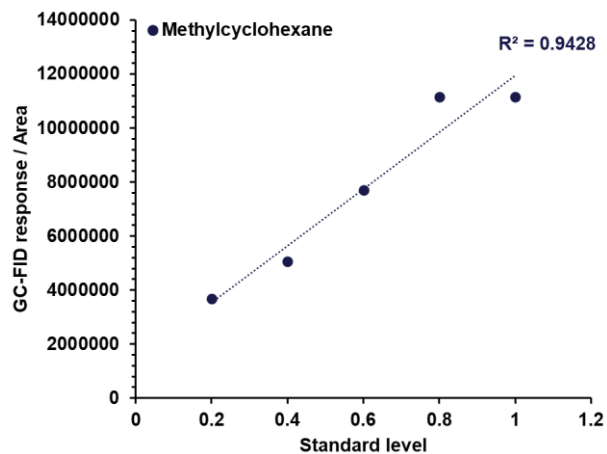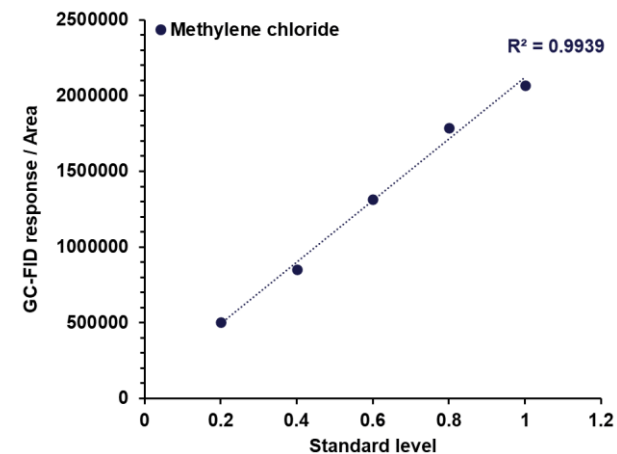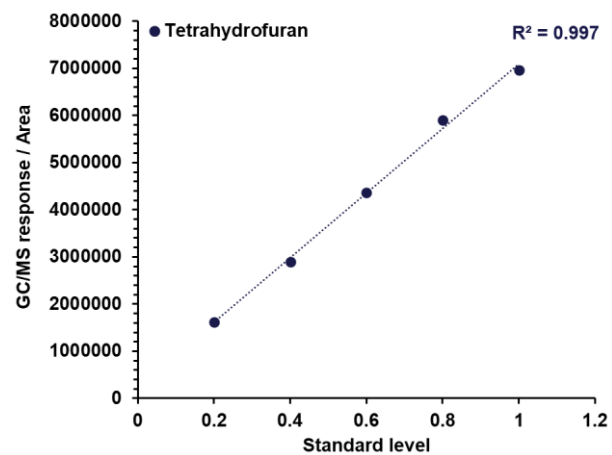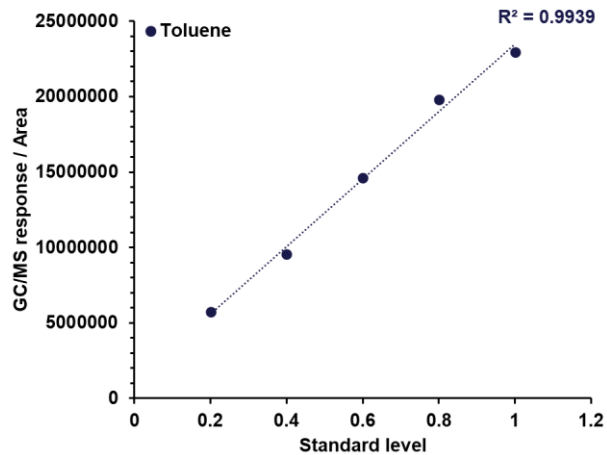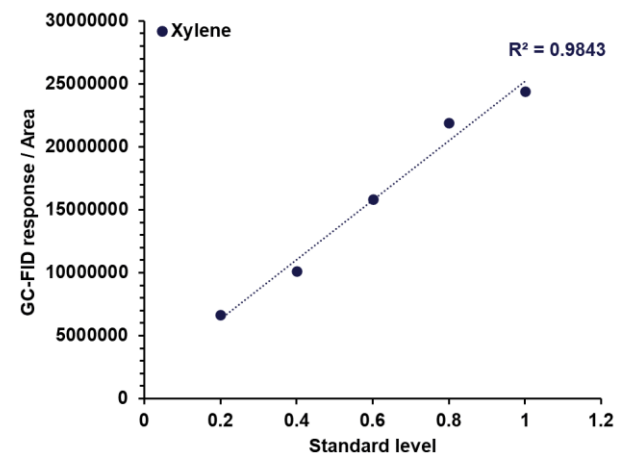

**Figure S4.** GC-FID linearity plots for Class 2B solvents across the concentration levels 0.2 to 1.0. GC-FID response is peak area. Note that for some analytes level 1.0 is not included as it significantly skewed the linear fit.

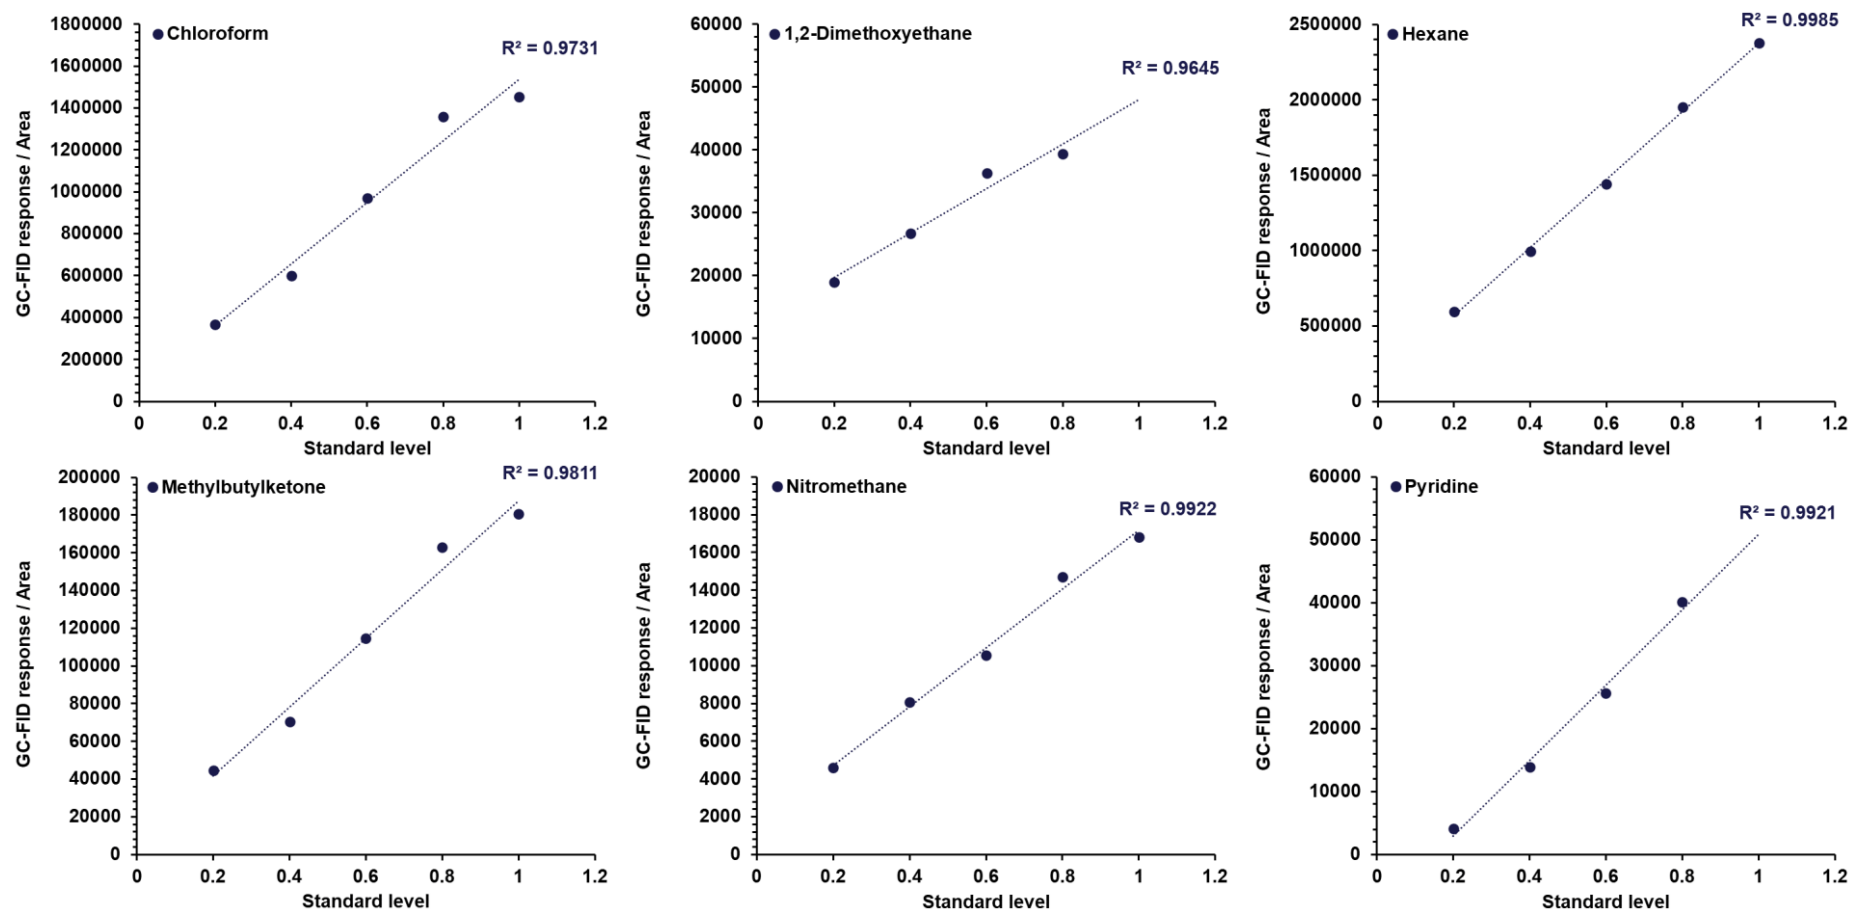

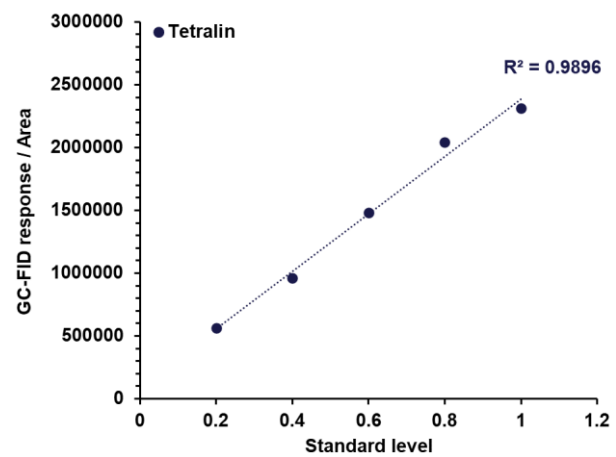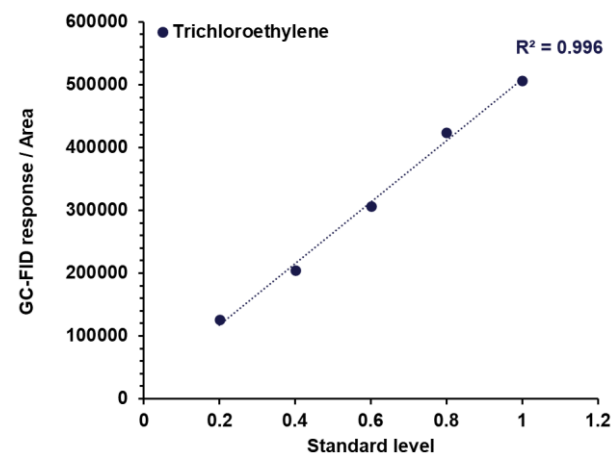

## B. Accuracy

**Figure S5.** Accuracy data from “Run 1” GC-FID and SIFT-MS measurements of 0.5 and 1.0 level solvent spikes in solutions prepared from (a) tableted and (b) oral suspension formulations of acetaminophen (paracetamol). The box-and-whisker plots summarize all replicate data in Tables S11a to S18a, except for (i) the GC-FID replicates that were identified as outliers, and (ii) SIFT-MS ions experiencing significant matrix interference (oral suspension only; 1,4-dioxane (using  $\text{H}_3\text{O}^+$  and  $m/z$  89) and hexane ( $\text{NO}^+$  85)). “Run 2” data are shown in Figure 6 of the article and in Tables S11b to S18b.

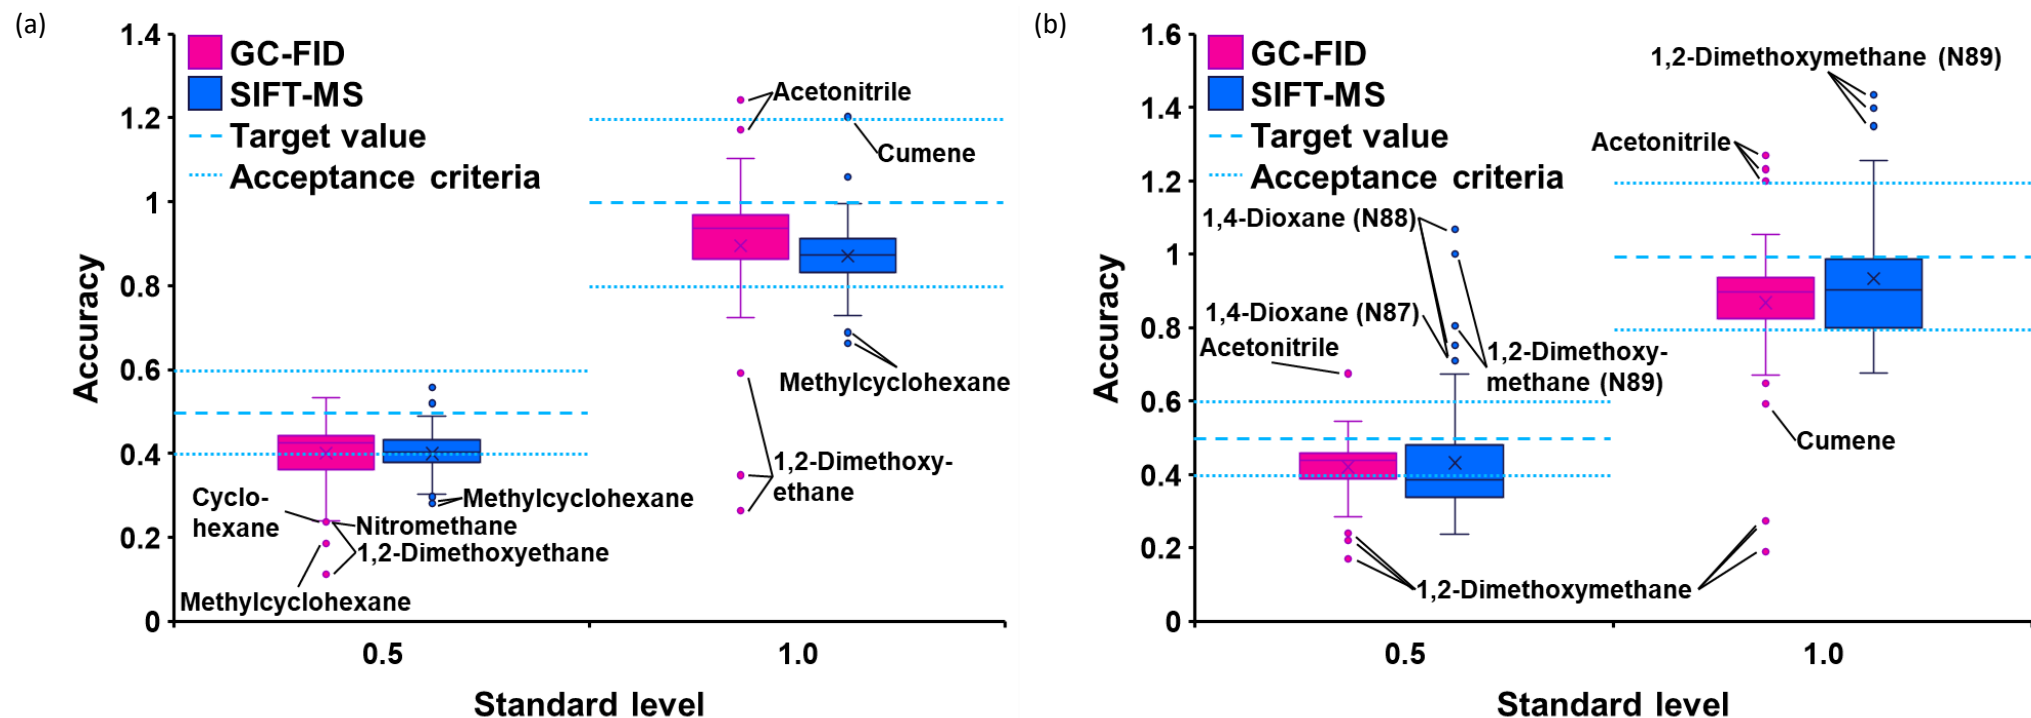



## C. Recovery

**Figure S6.** Recovery data from “Run 1” GC-FID and SIFT-MS measurements of 0.5 and 1.0 level solvent spikes in solutions prepared from (a) tableted and (b) oral suspension formulations of acetaminophen (paracetamol). The box-and-whisker plots summarize all replicate data in Tables S19a to S26a, except for (i) the GC-FID replicates that were identified as outliers, and (ii) SIFT-MS ions experiencing significant matrix interference (oral suspension only; 1,4-dioxane (using  $\text{H}_3\text{O}^+$  and  $m/z$  89) and hexane ( $\text{NO}^+$  85)). “Run 2” data are shown in Figure 7 of the article and in Tables S19b to S26b.

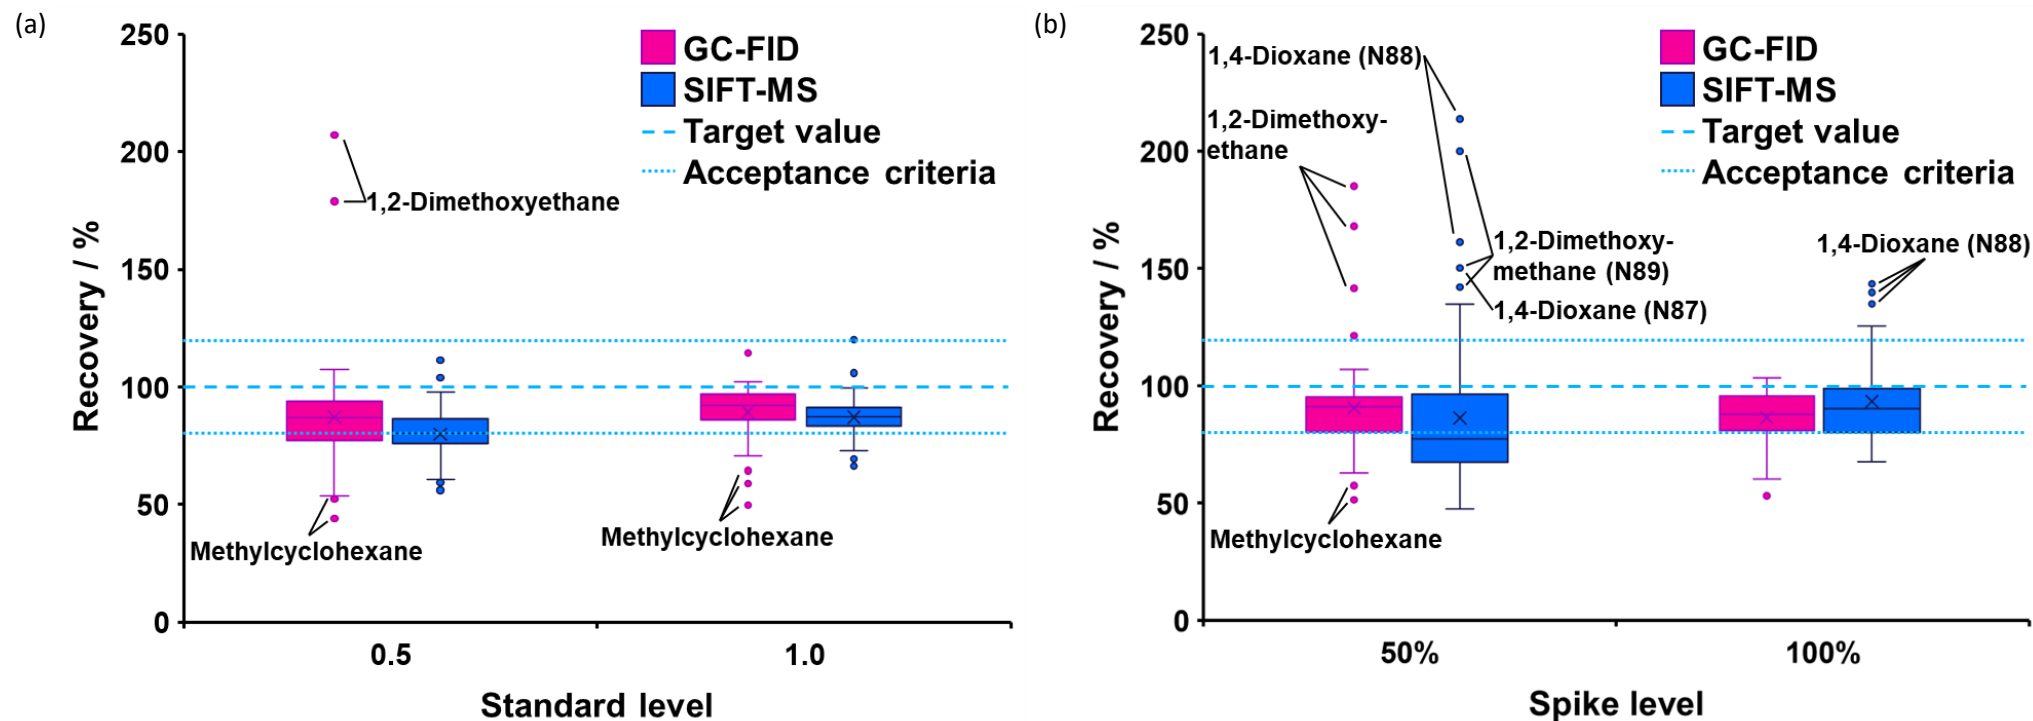

Supplement: s1 [file s1]
